# Supplementary material for: Enantioselective construction of novel chiral spirooxindoles incorporating a thiazole nucleus
Source: Royal Society of Chemistry journal article supplement (doi:10.1039/c6ra14178a), 2016-01-01

## Table of Contents

- |                                                             |                   |
|-------------------------------------------------------------|-------------------|
| 1. X-ray crystallography data of compound <b>3ad</b>        | Page 1 – Page 1   |
| 2. Copies of <sup>1</sup> H and <sup>13</sup> C NMR spectra | Page 2 – Page 18  |
| 3. Copies of HRMS spectra                                   | Page 18 – Page 27 |
| 4. Copies of HPLC spectra                                   | Page 27 – Page 45 |
| 5. Copies of IR spectra                                     | Page 46 – Page 54 |

### 1. Crystallography data of Compound **3ad**

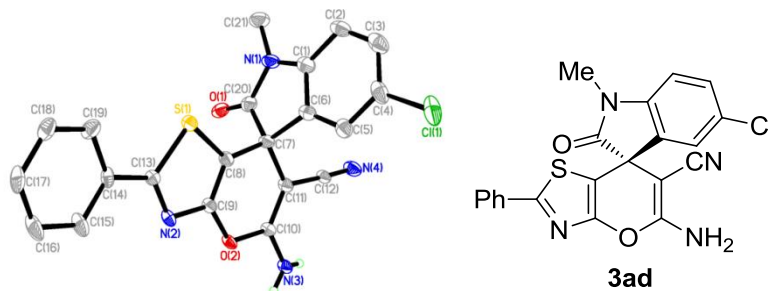

|                                   |                                                                                                                  |
|-----------------------------------|------------------------------------------------------------------------------------------------------------------|
| Identification code               | m20151228d                                                                                                       |
| Empirical formula                 | C <sub>22.25</sub> H <sub>15.50</sub> Cl <sub>3.50</sub> N <sub>4</sub> O <sub>2</sub> S                         |
| Formula weight                    | 527.02                                                                                                           |
| Temperature                       | 113(2) K                                                                                                         |
| Wavelength                        | 0.71073 Å                                                                                                        |
| Crystal system, space group       | Orthorhombic, P2(1)2(1)2(1)                                                                                      |
| Unit cell dimensions              | a = 12.4973(2) Å    alpha = 90 deg.<br>b = 24.2521(3) Å    beta = 90 deg.<br>c = 30.8995(4) Å    gamma = 90 deg. |
| Volume                            | 9365.2(2) Å <sup>3</sup>                                                                                         |
| Z, Calculated density             | 16, 1.495 Mg/m <sup>3</sup>                                                                                      |
| Absorption coefficient            | 0.566 mm <sup>-1</sup>                                                                                           |
| F(000)                            | 4296                                                                                                             |
| Crystal size                      | 0.200 x 0.180 x 0.120 mm                                                                                         |
| Theta range for data collection   | 1.563 to 25.019 deg.                                                                                             |
| Limiting indices                  | -14 ≤ h ≤ 14, -28 ≤ k ≤ 28, -36 ≤ l ≤ 36                                                                         |
| Reflections collected / unique    | 66384 / 16530 [R(int) = 0.0293]                                                                                  |
| Completeness to theta = 67.687    | 100.0 %                                                                                                          |
| Absorption correction             | Semi-empirical from equivalents                                                                                  |
| Max. and min. transmission        | 1.00000 and 0.50244                                                                                              |
| Refinement method                 | Full-matrix least-squares on F <sup>2</sup>                                                                      |
| Data / restraints / parameters    | 16530 / 160 / 1280                                                                                               |
| Goodness-of-fit on F <sup>2</sup> | 1.094                                                                                                            |
| Final R indices [I > 2σ(I)]       | R1 = 0.0587, wR2 = 0.1683                                                                                        |
| R indices (all data)              | R1 = 0.0621, wR2 = 0.1720                                                                                        |
| Absolute structure parameter      | 0.016(11)                                                                                                        |
| Extinction coefficient            | n/a                                                                                                              |

Largest diff. peak and hole

1.111 and -0.667 e.A<sup>-3</sup>

## 2. Copies of <sup>1</sup>H and <sup>13</sup>C NMR Spectra

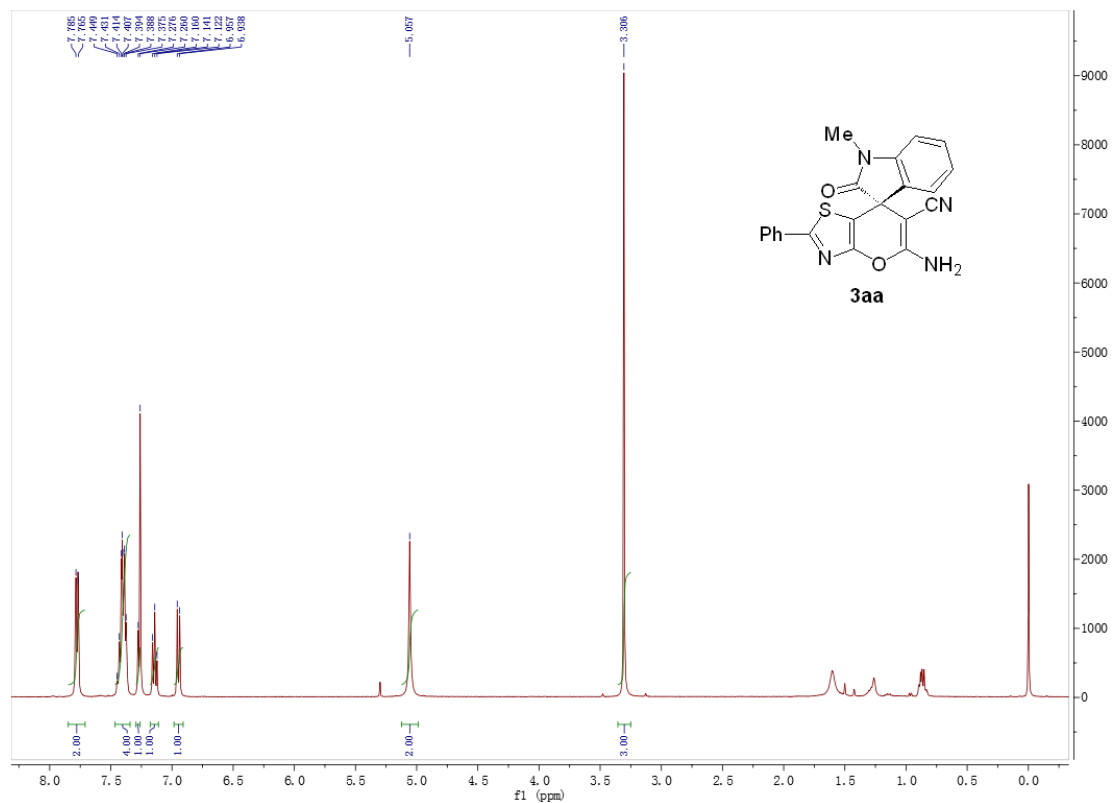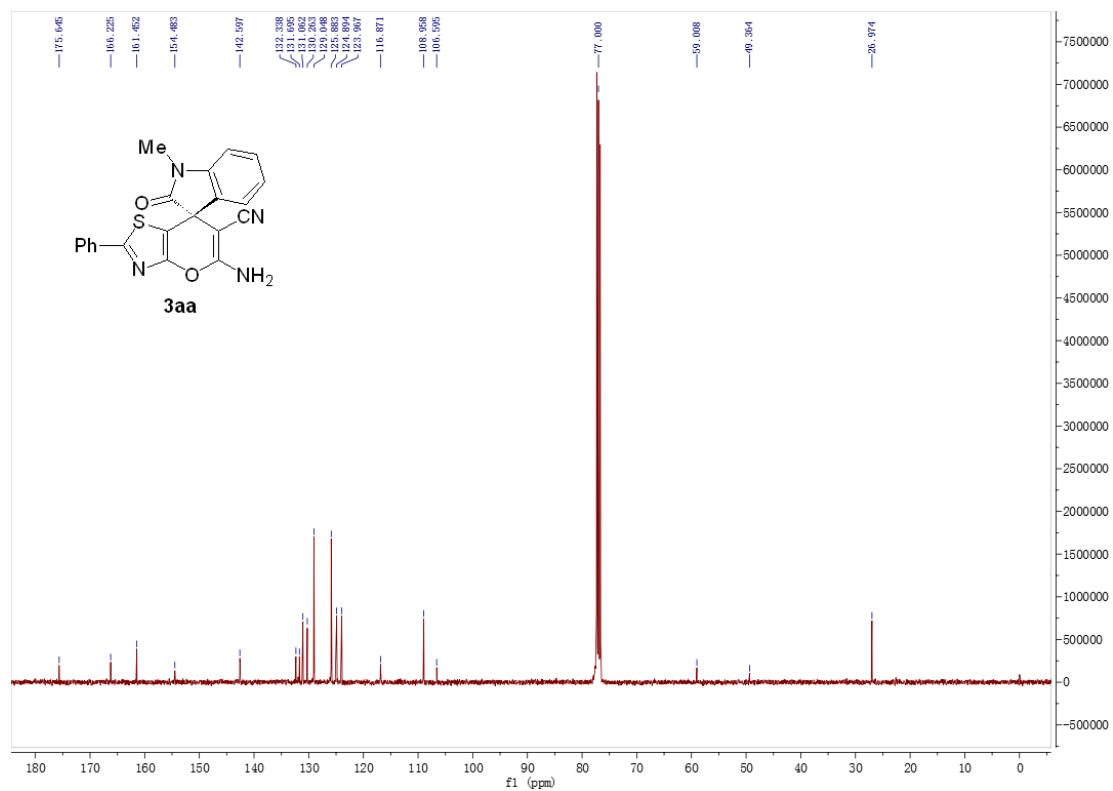

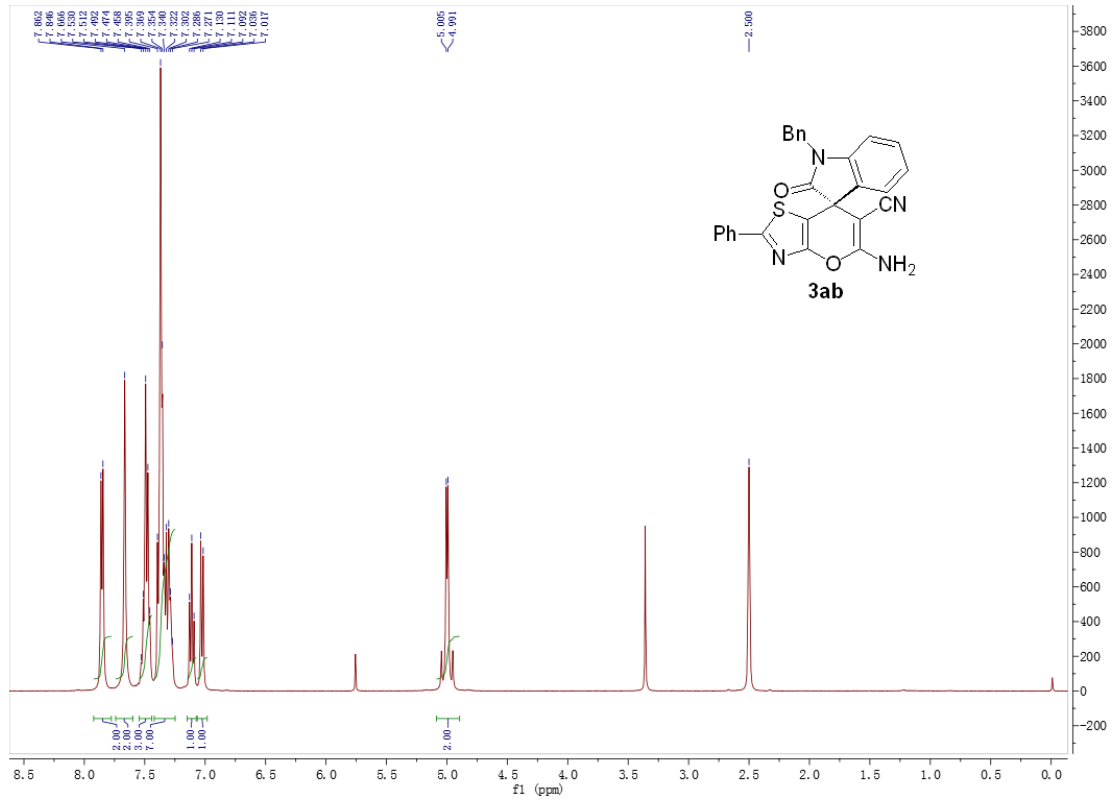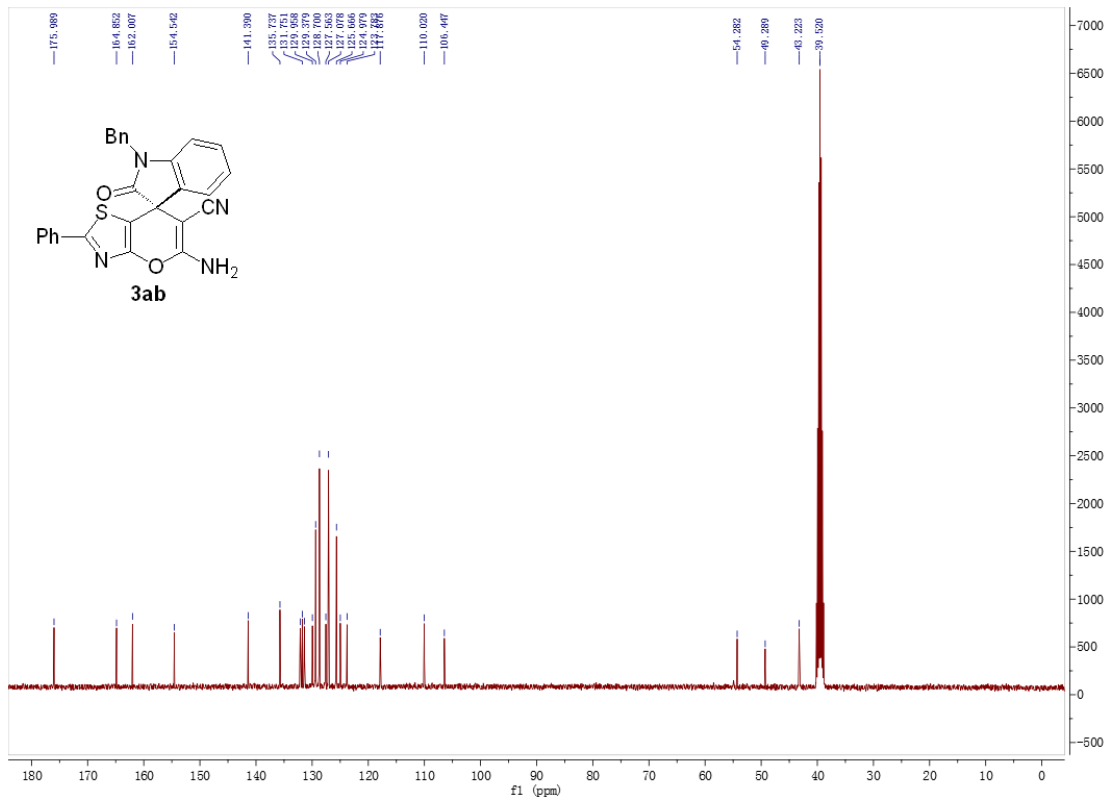

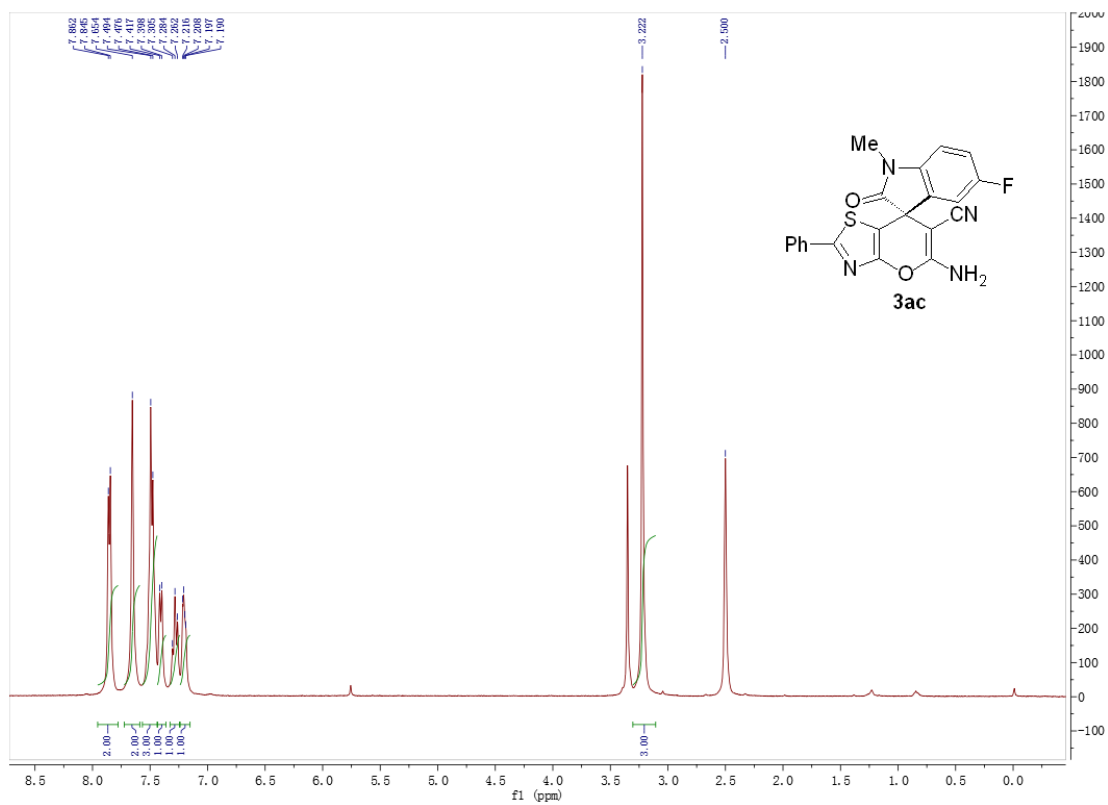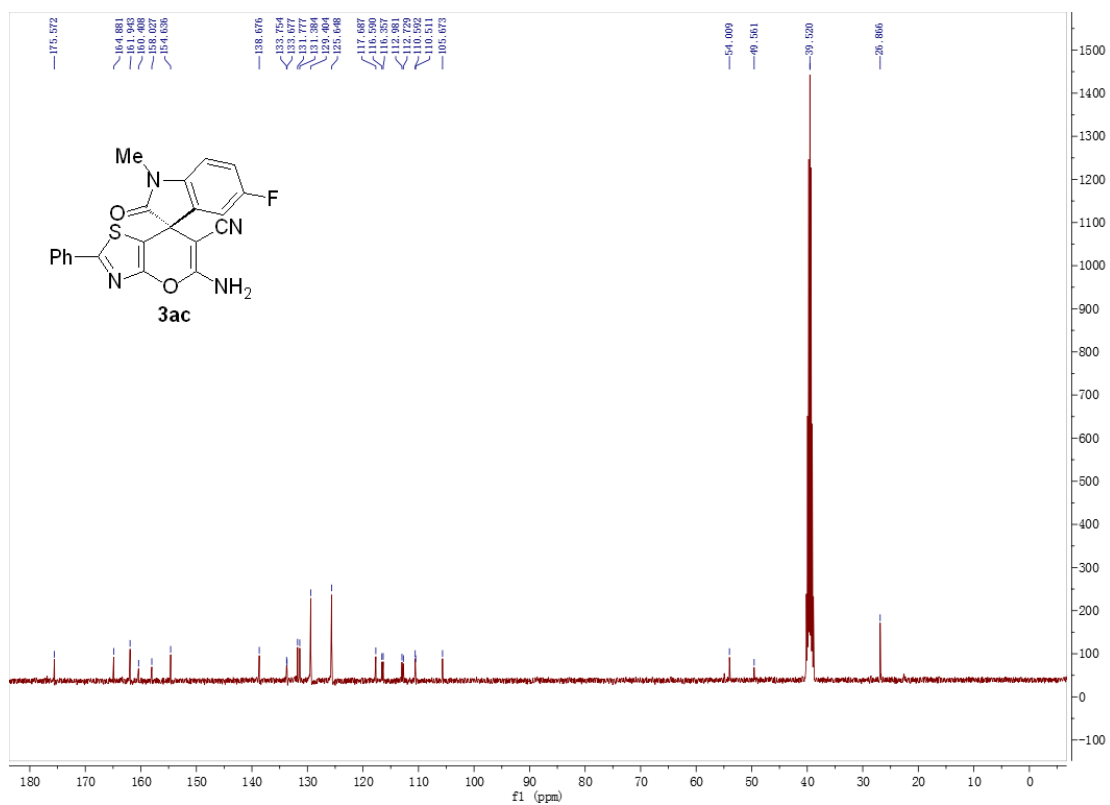

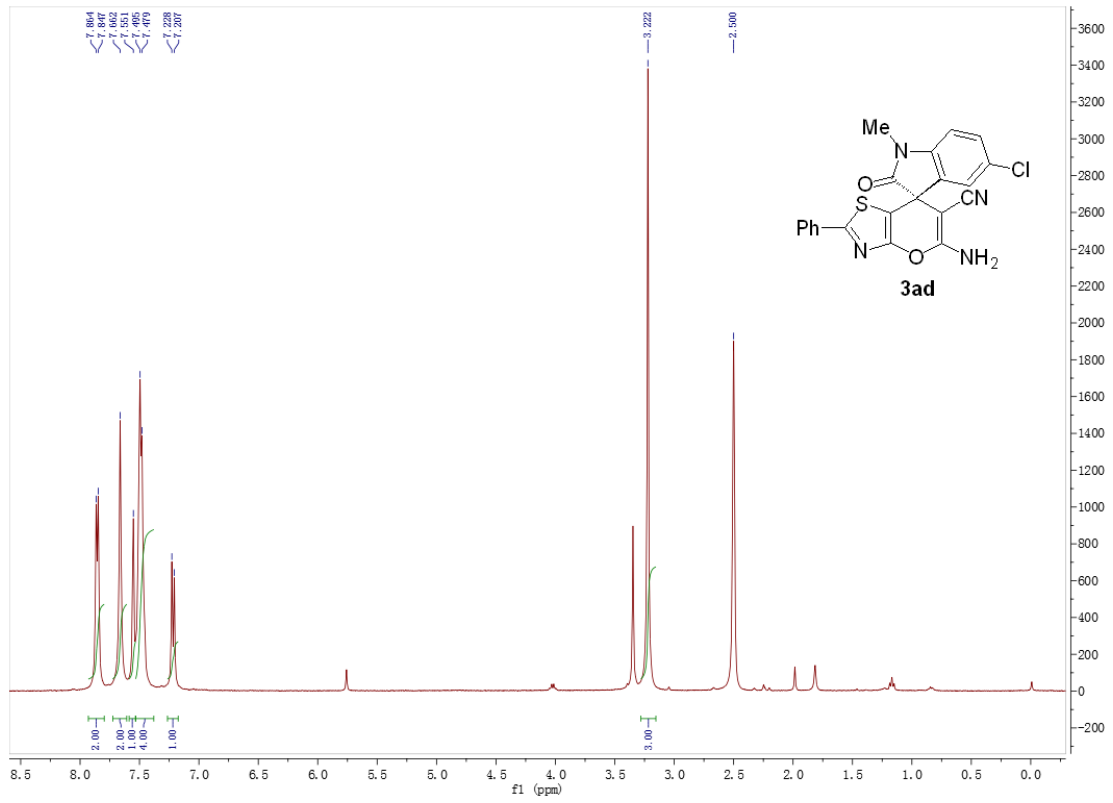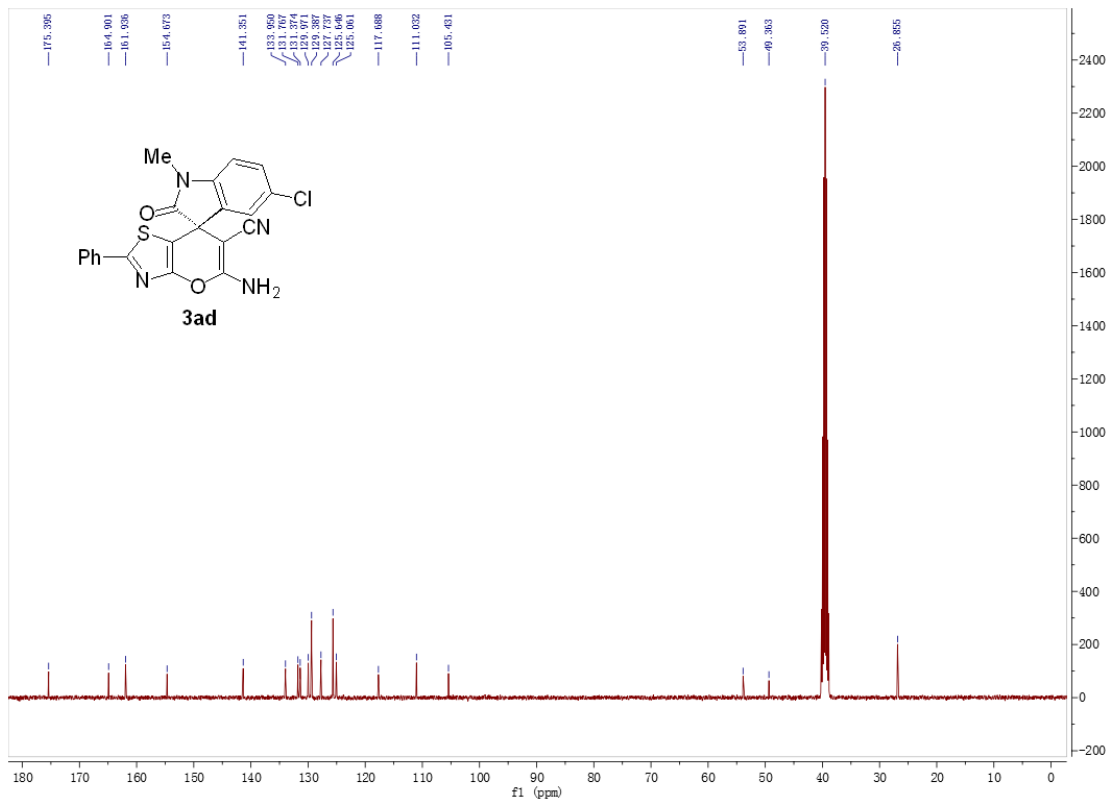

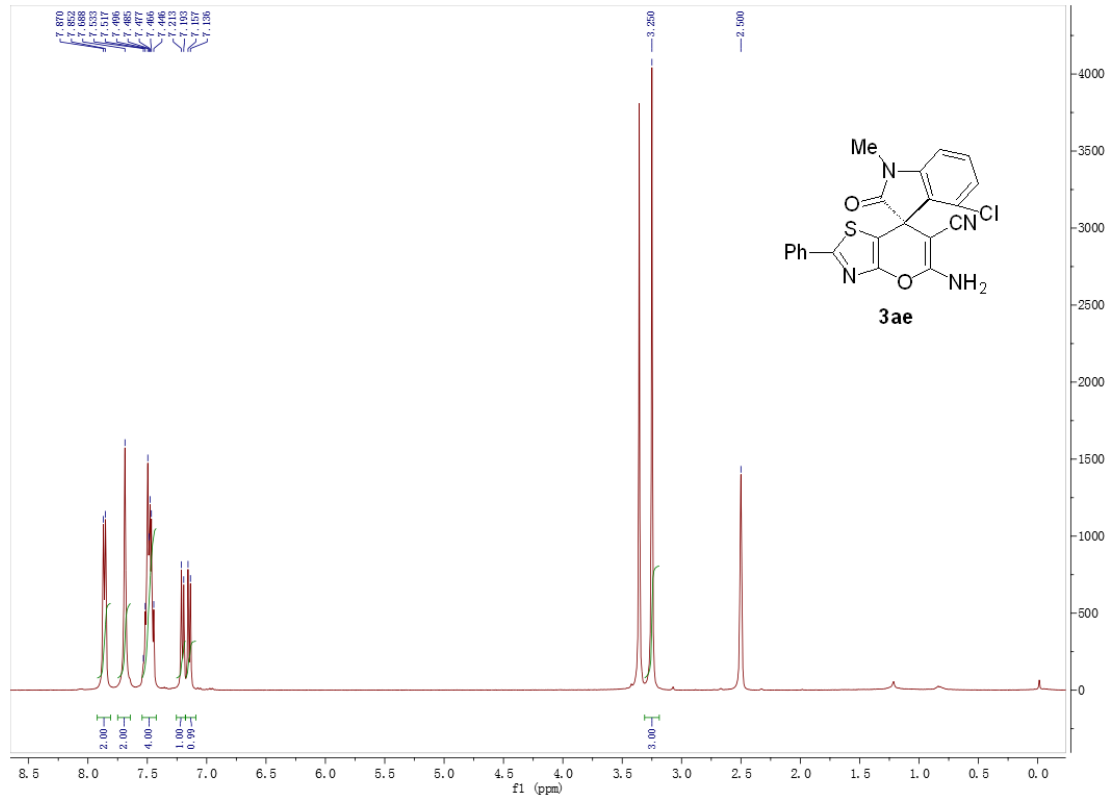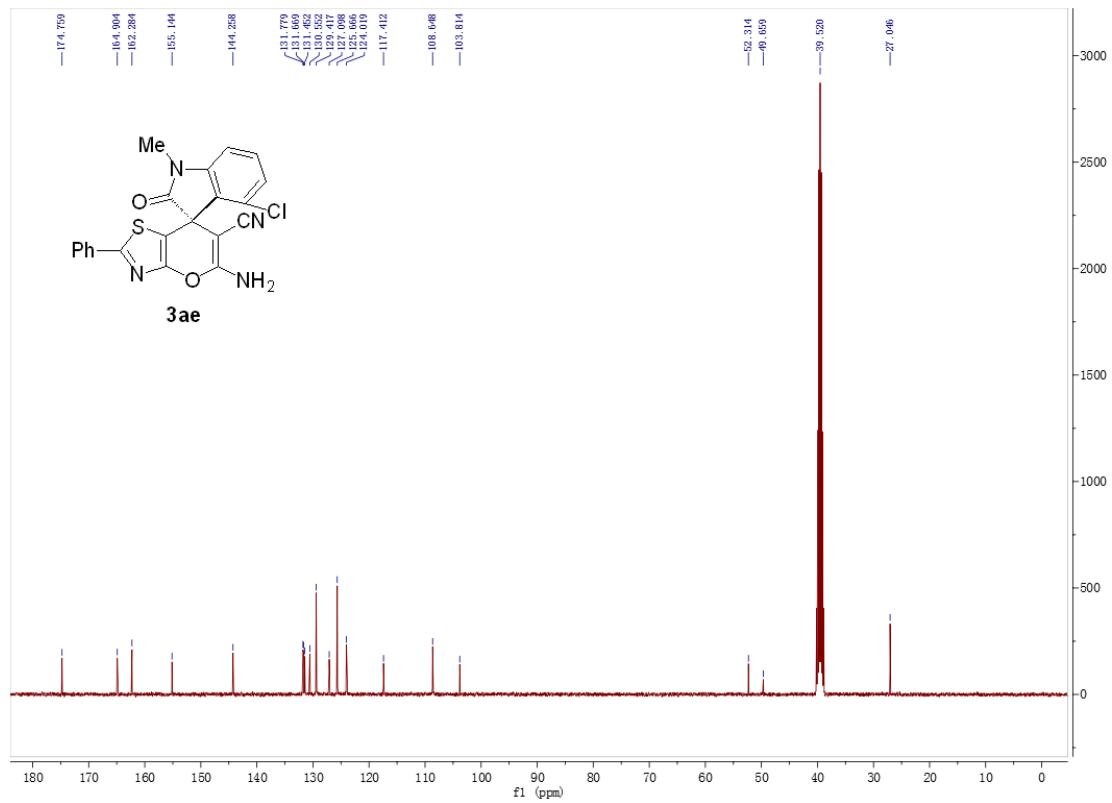

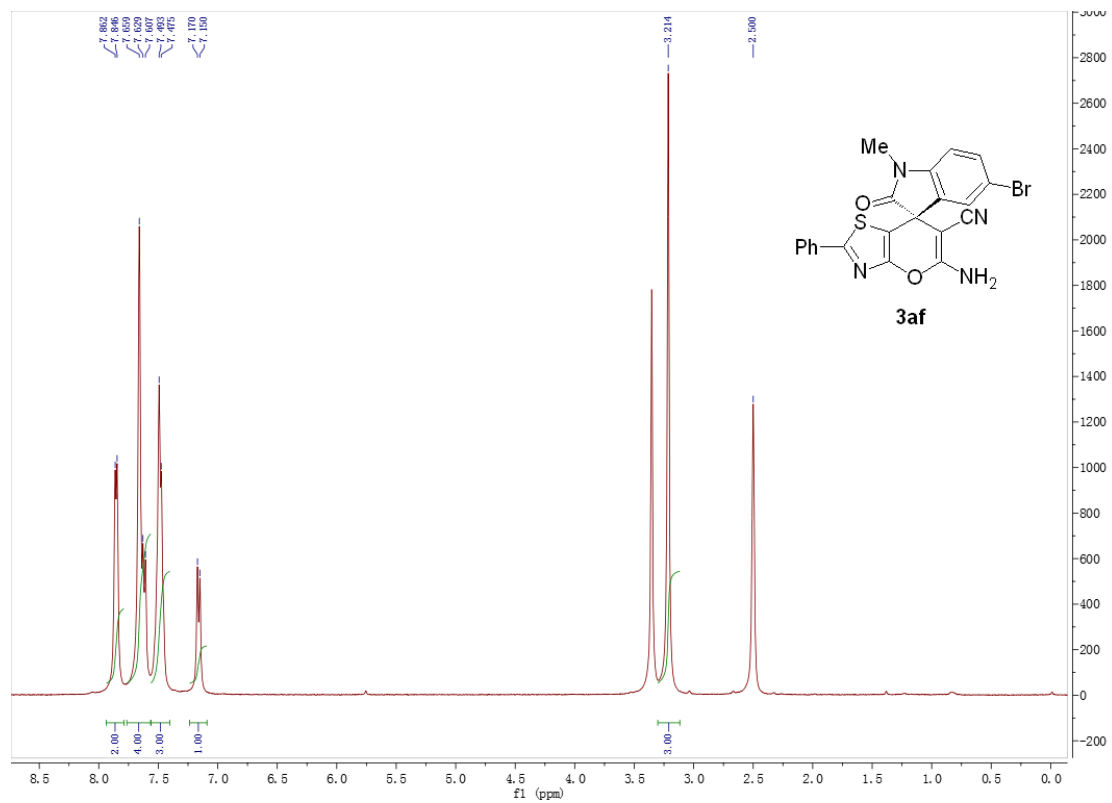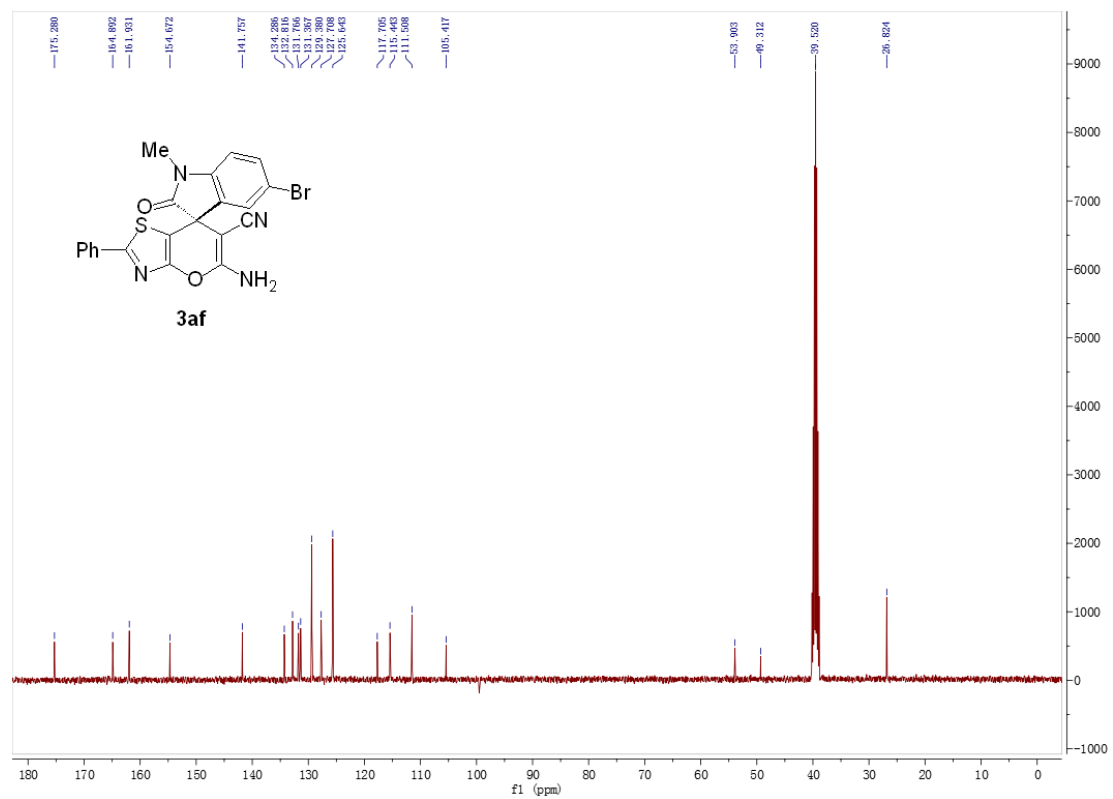

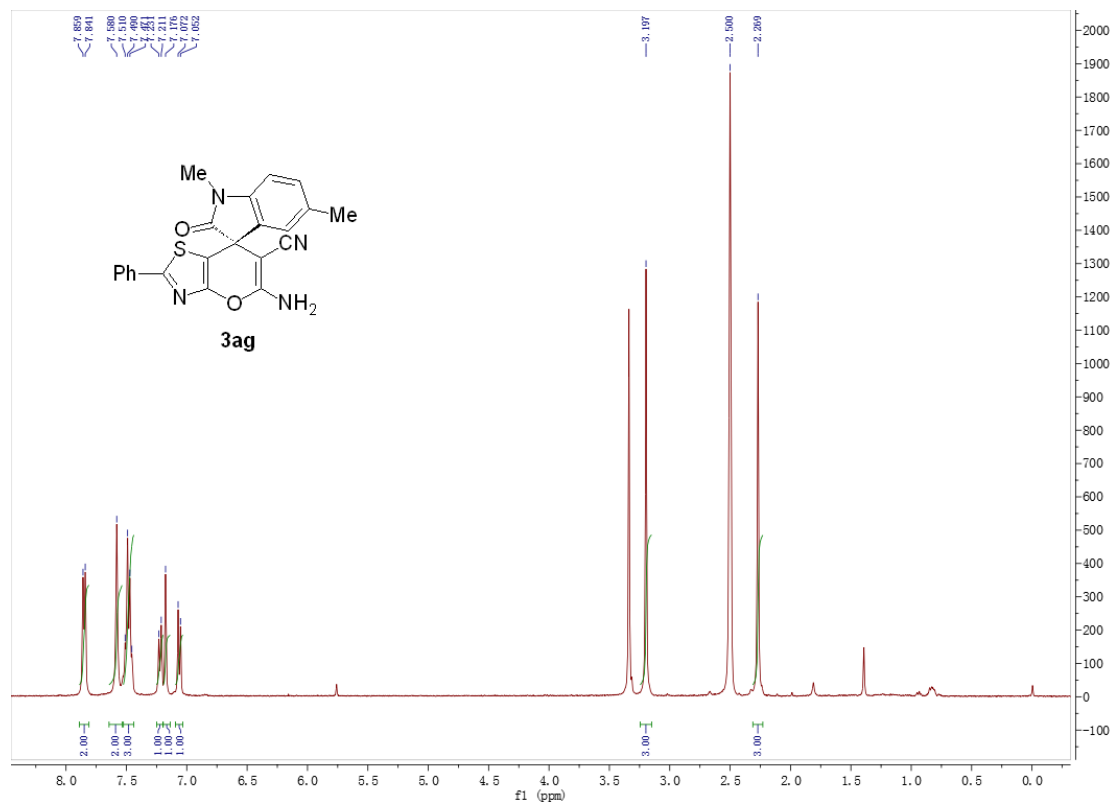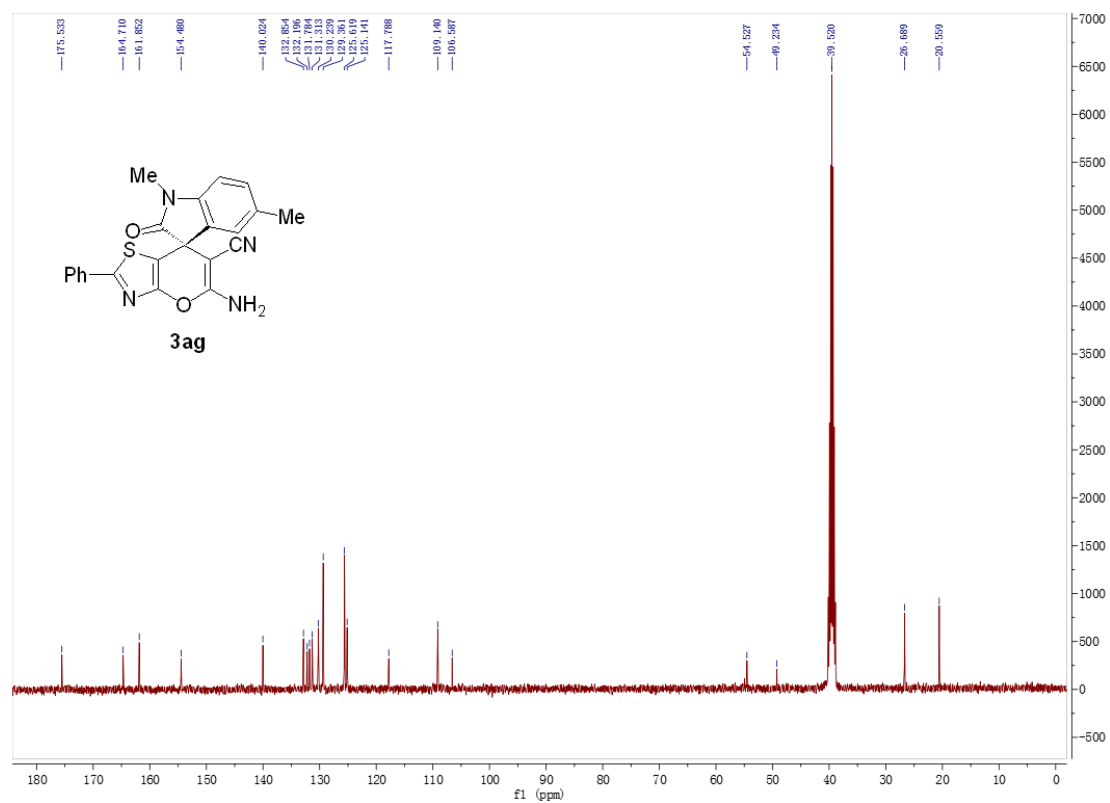



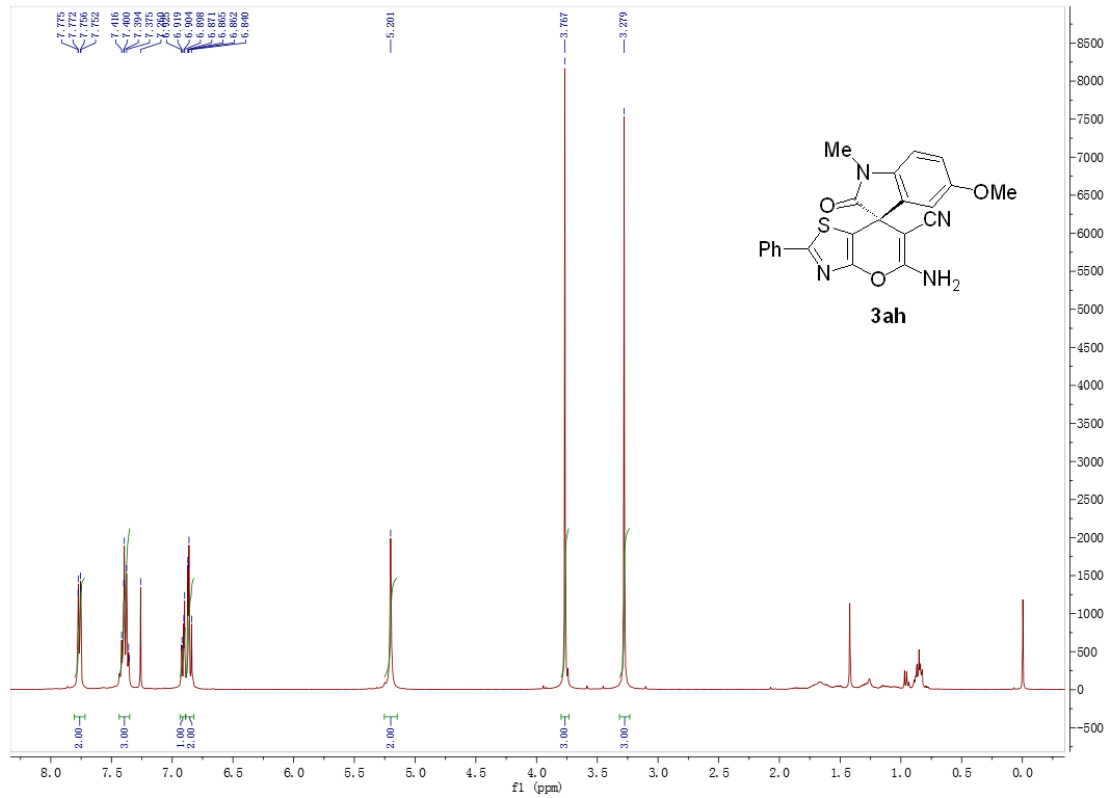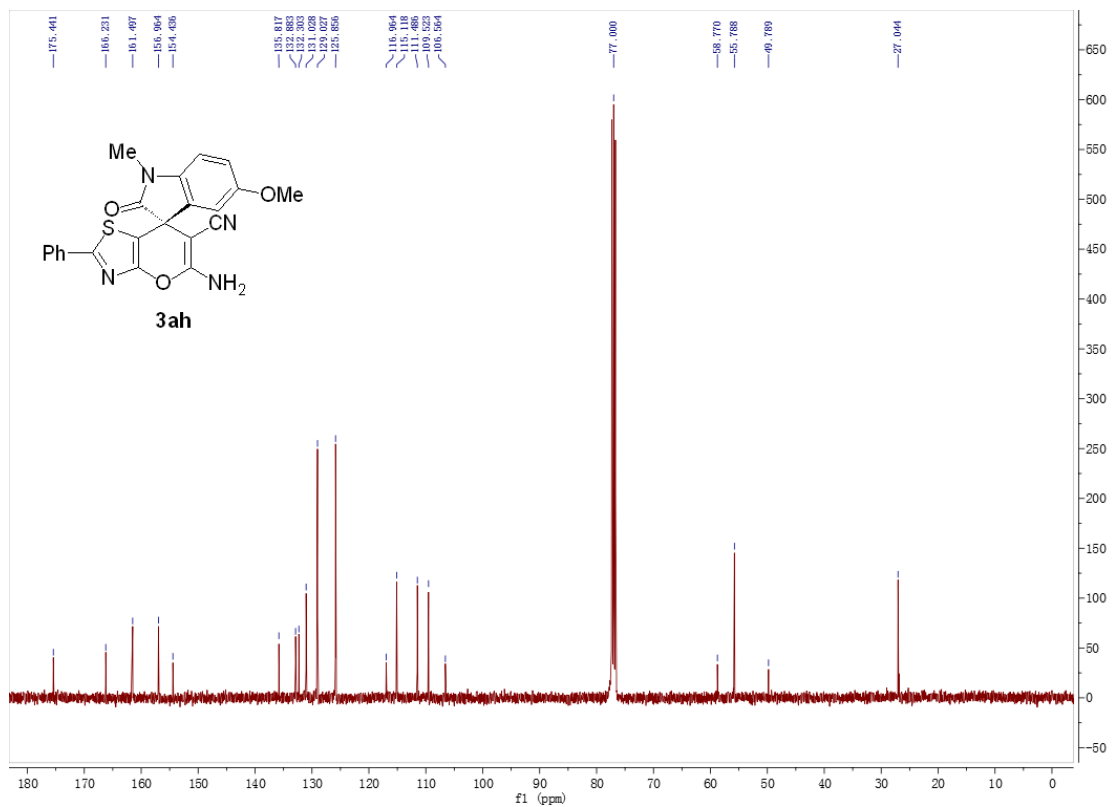

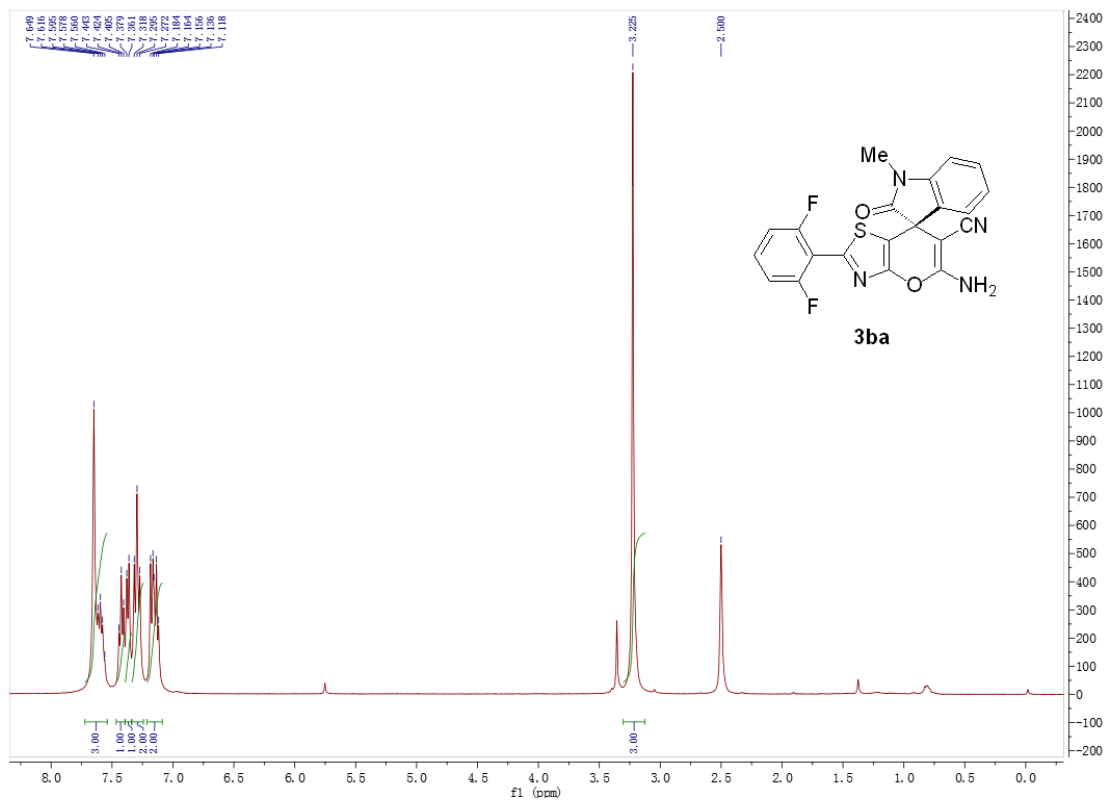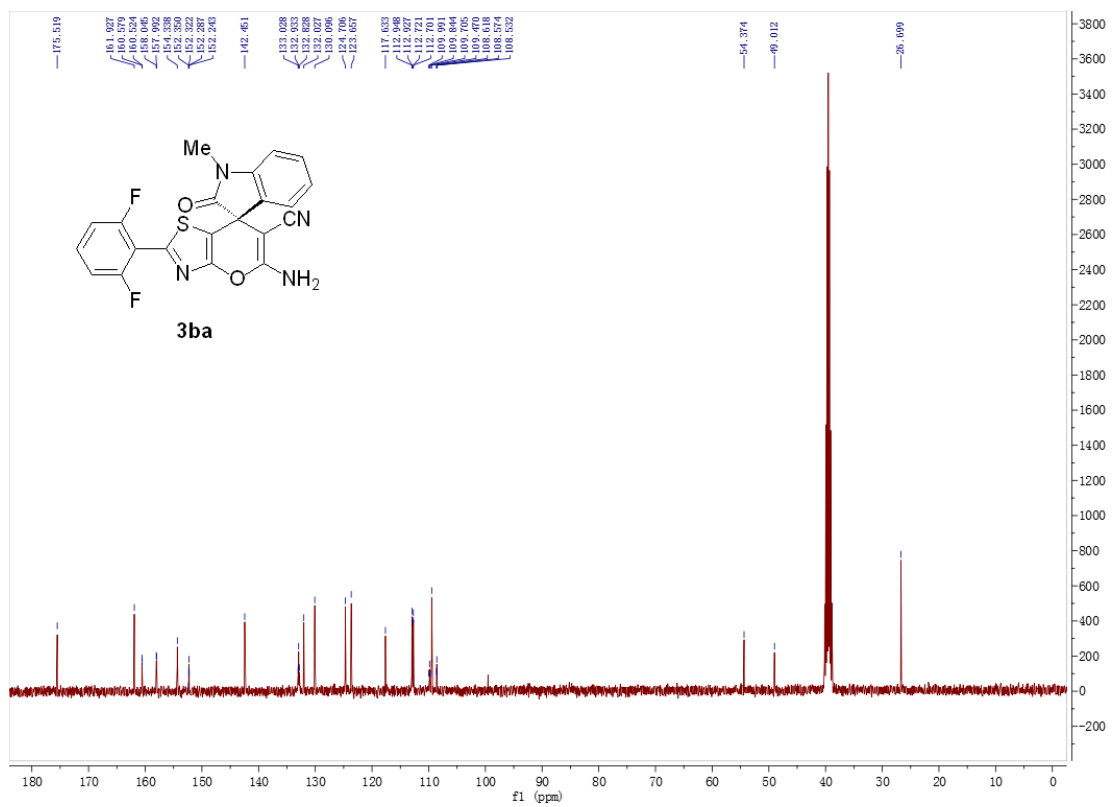

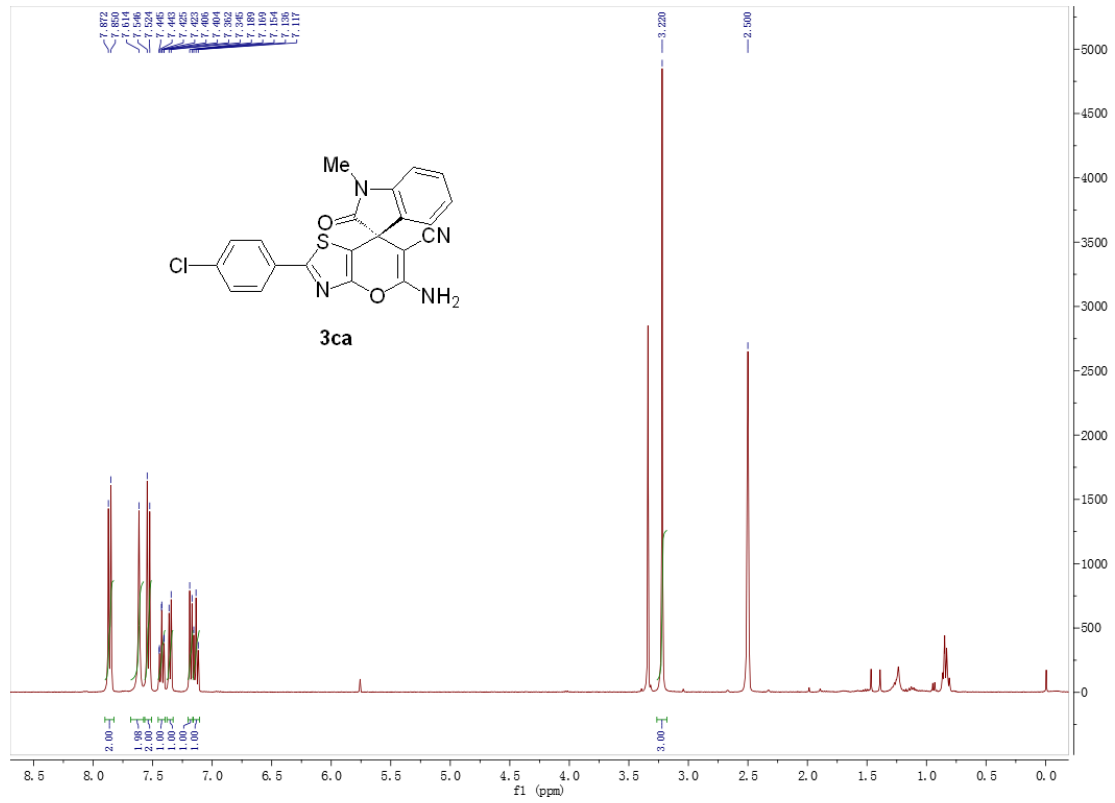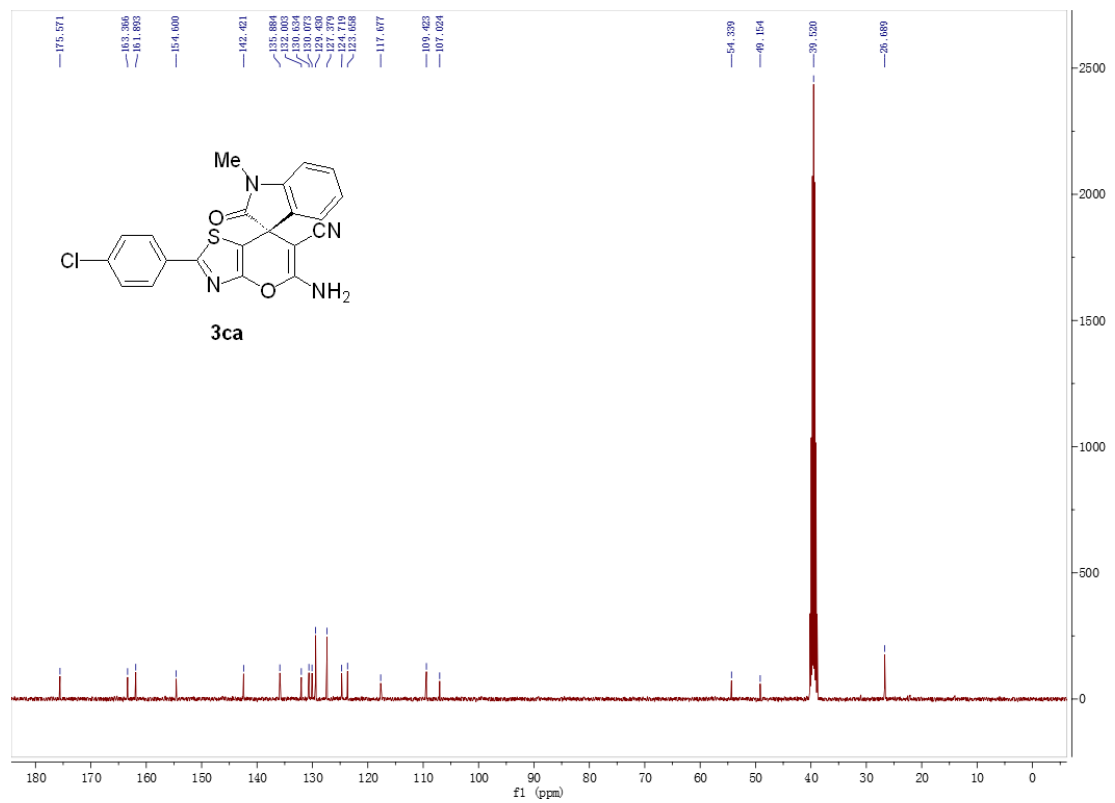

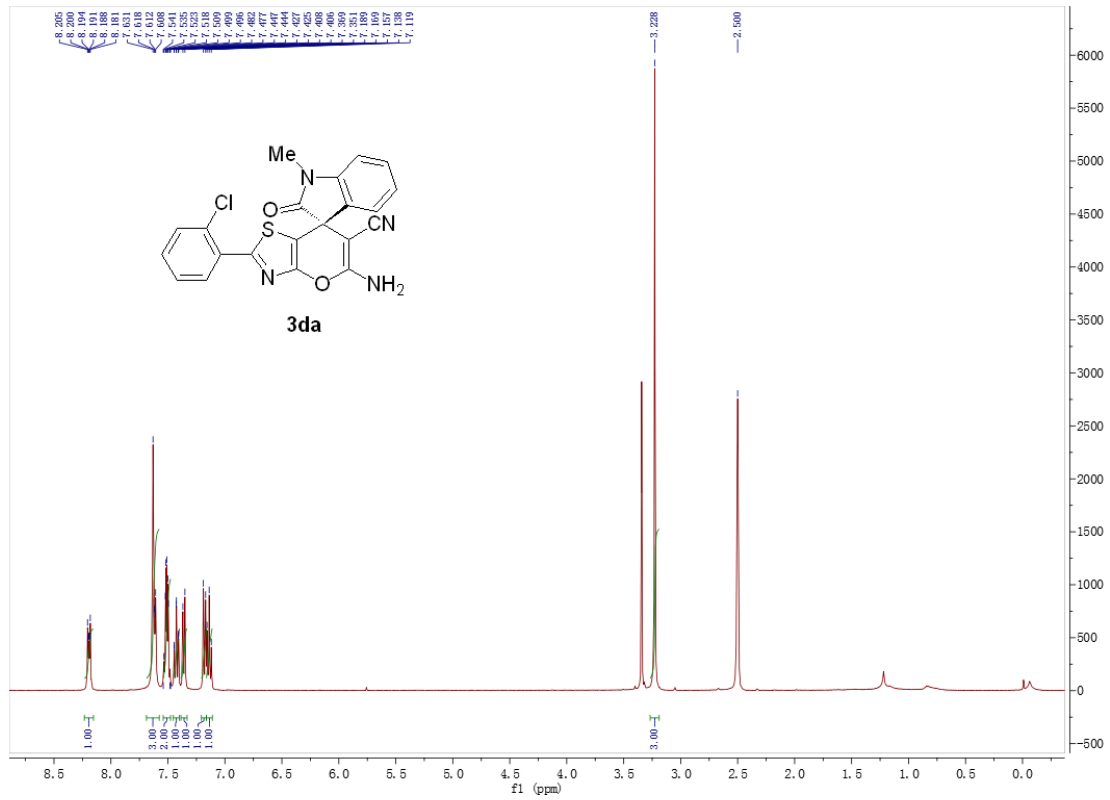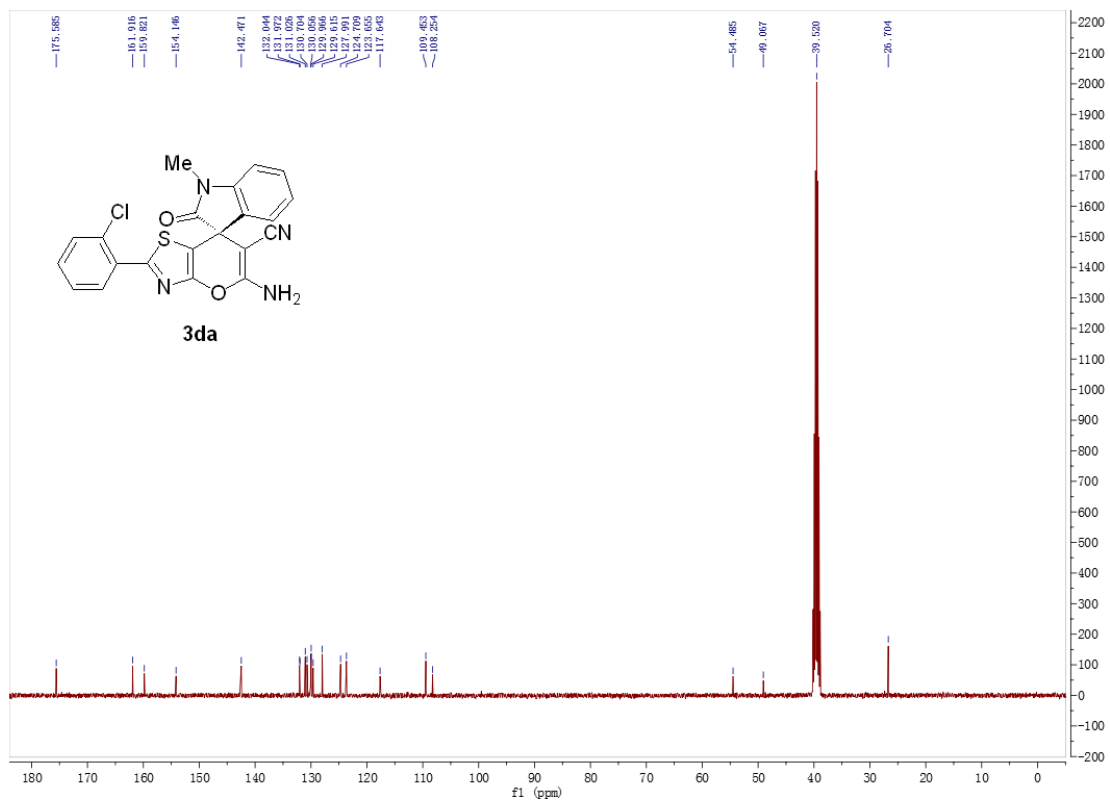

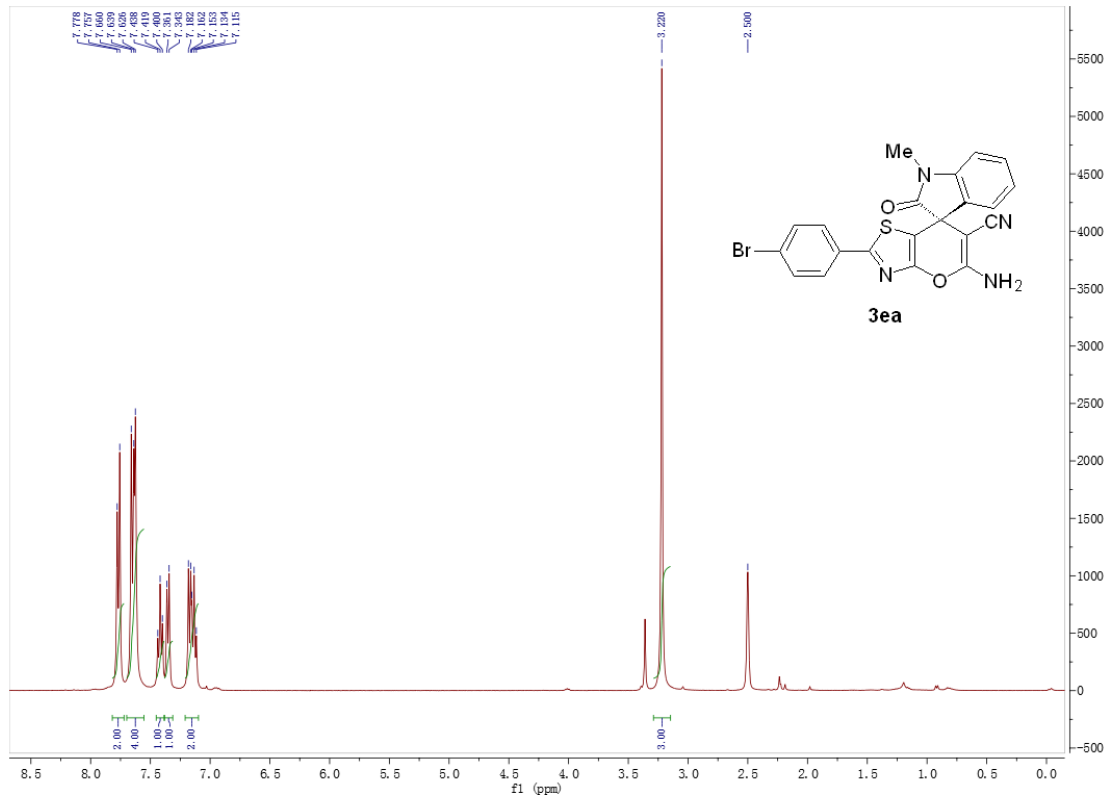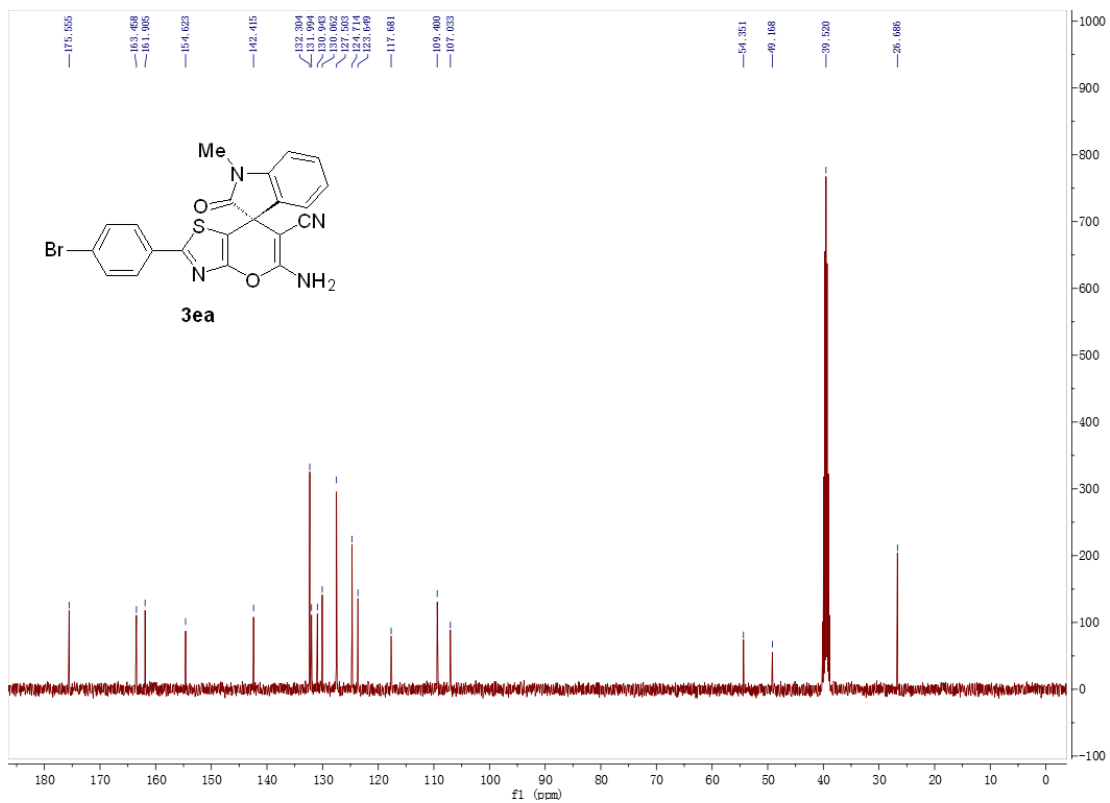

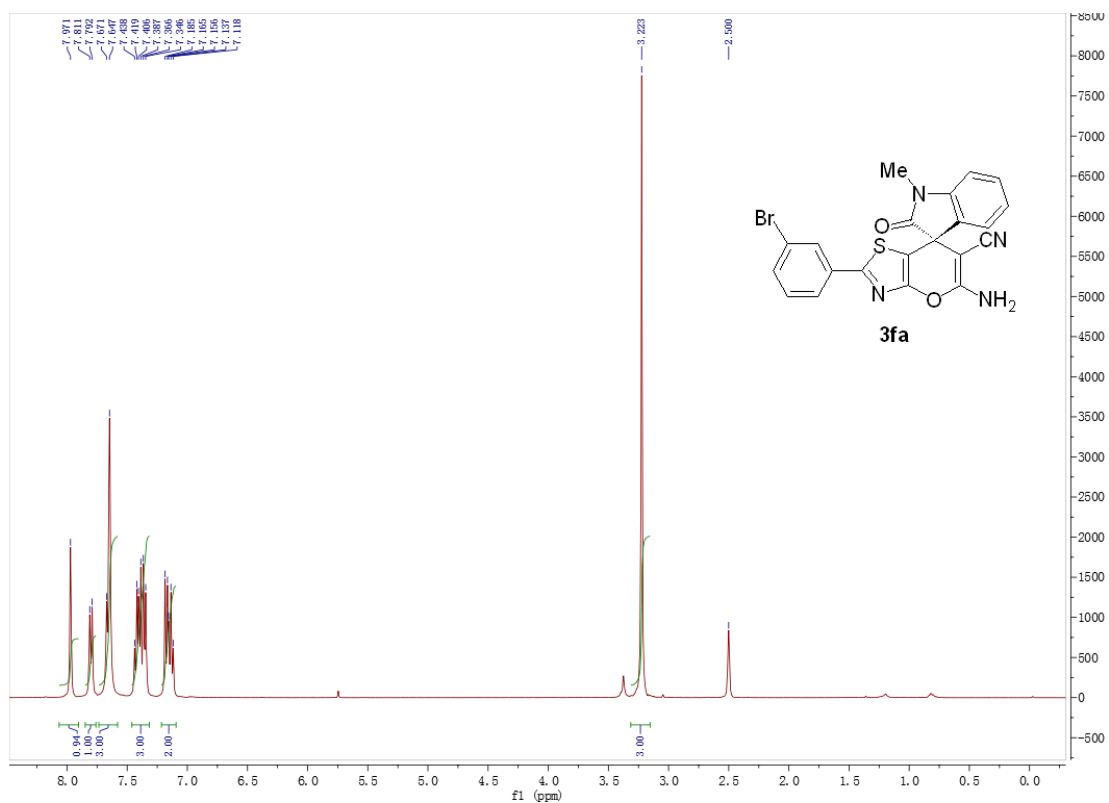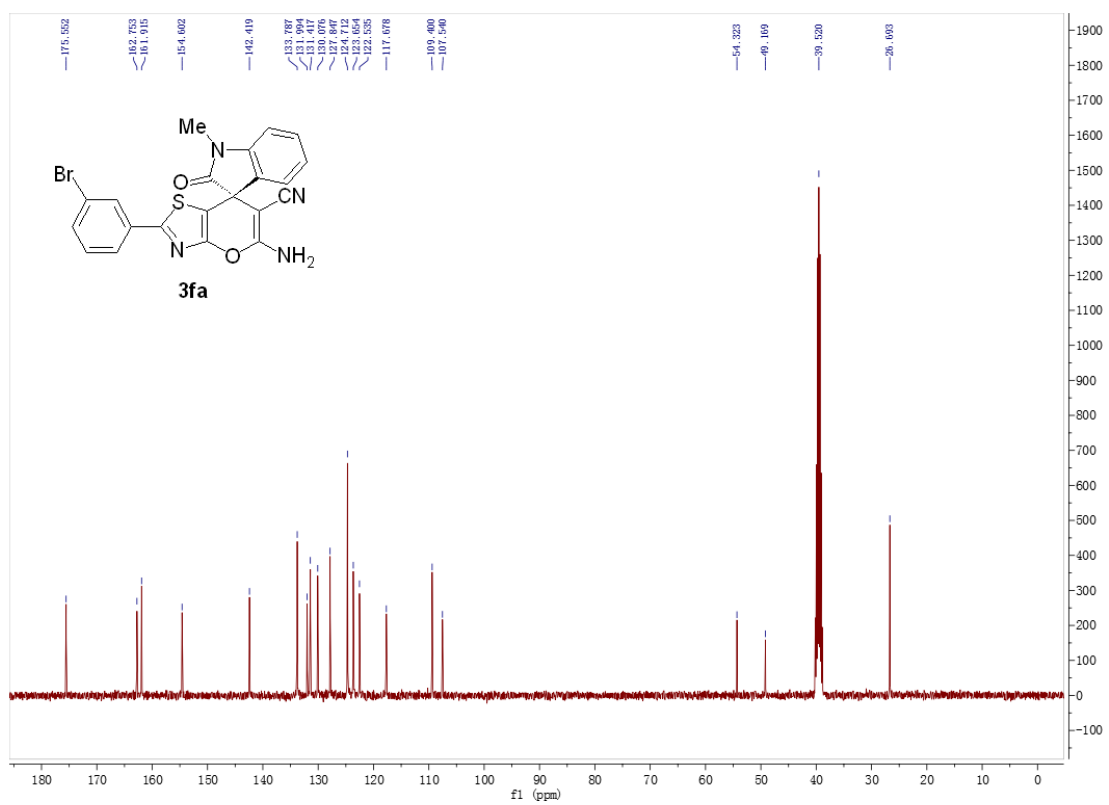

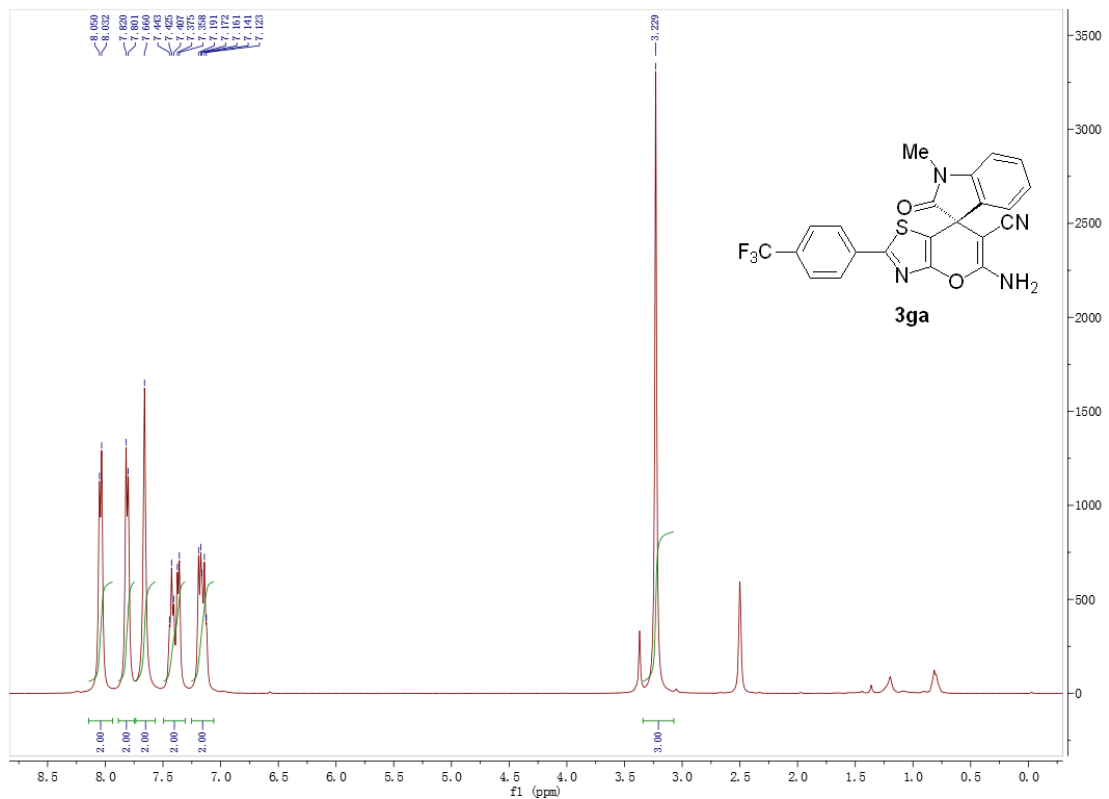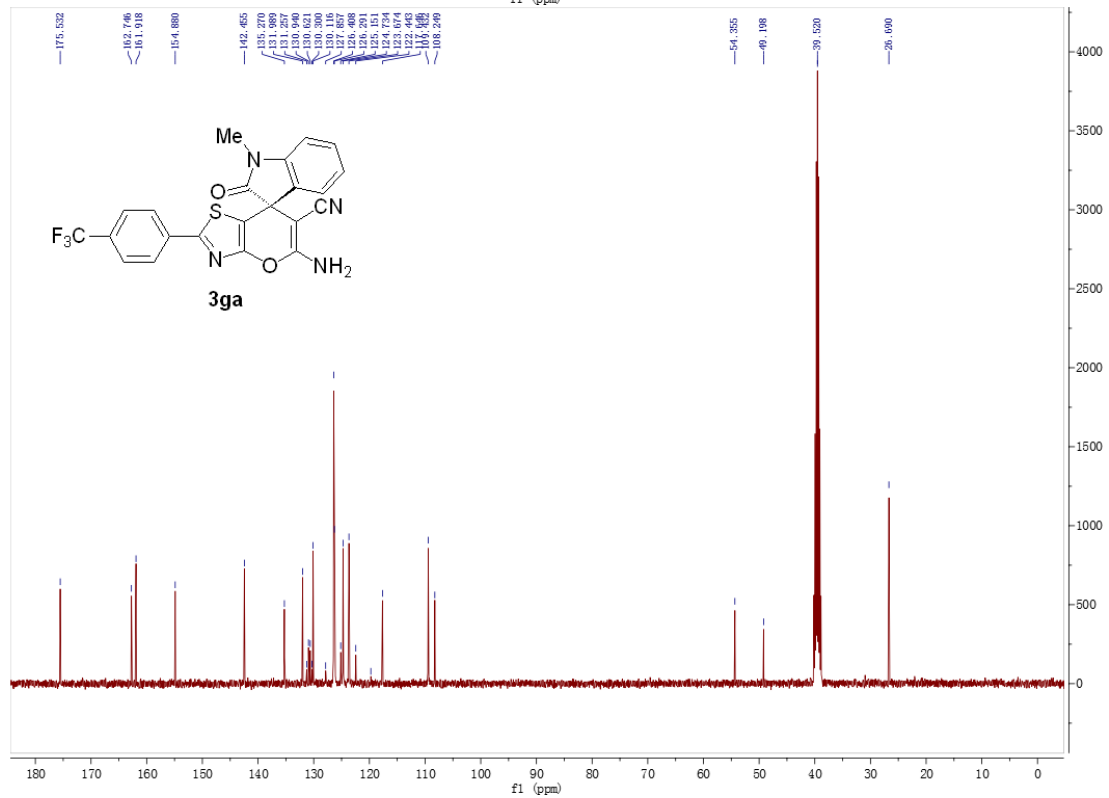

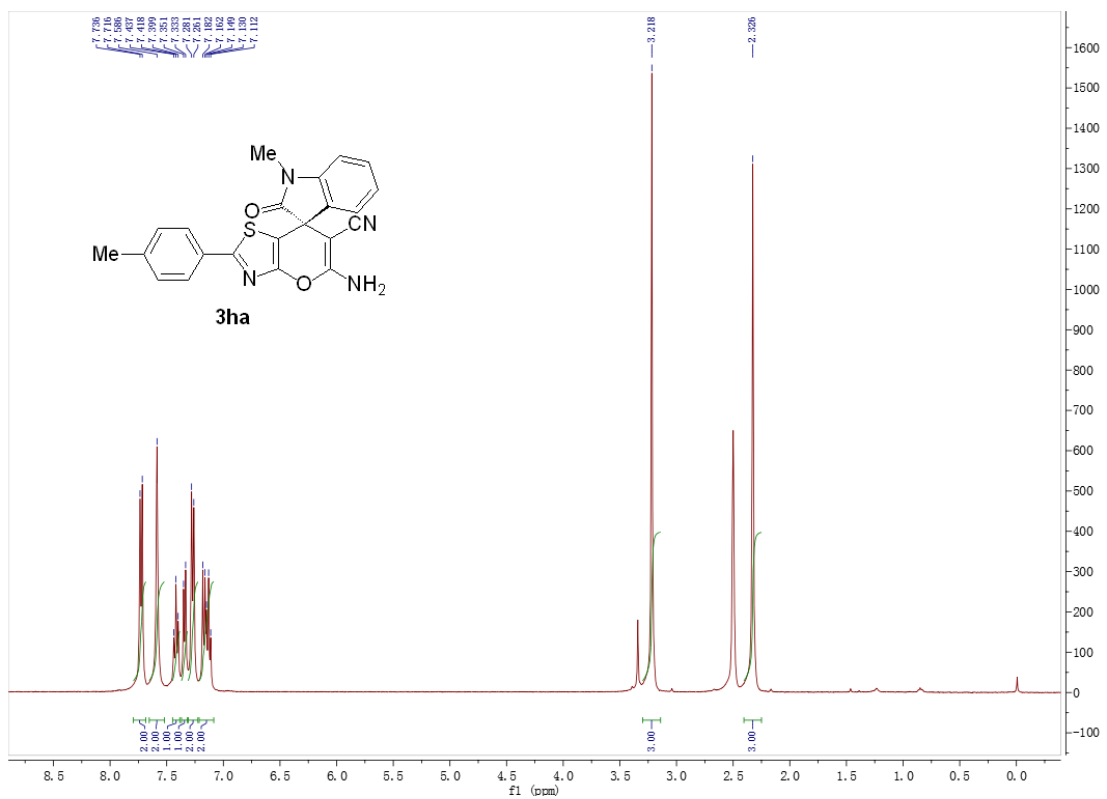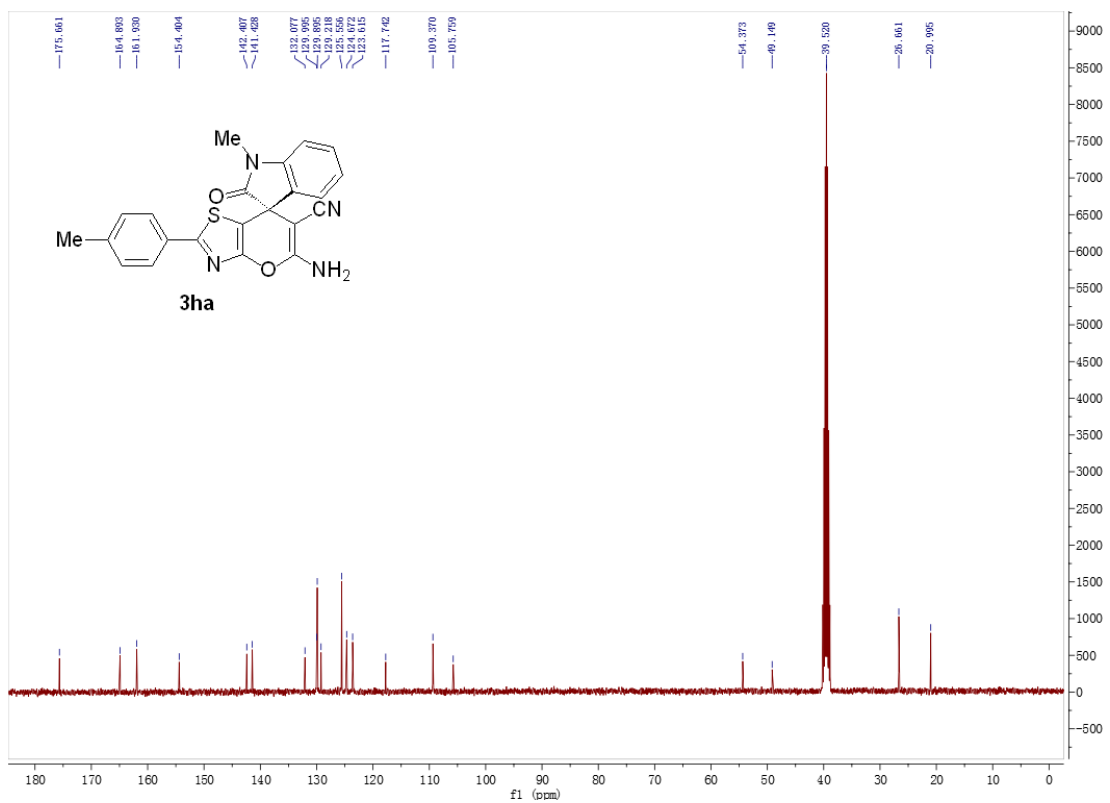



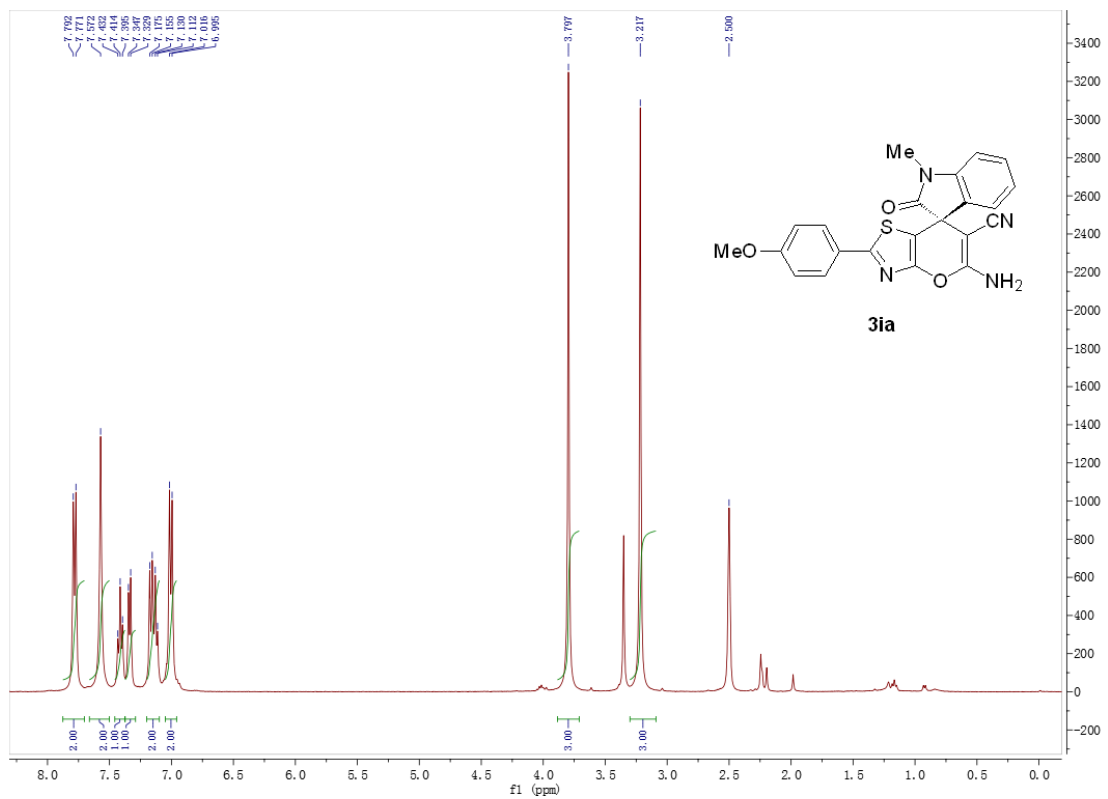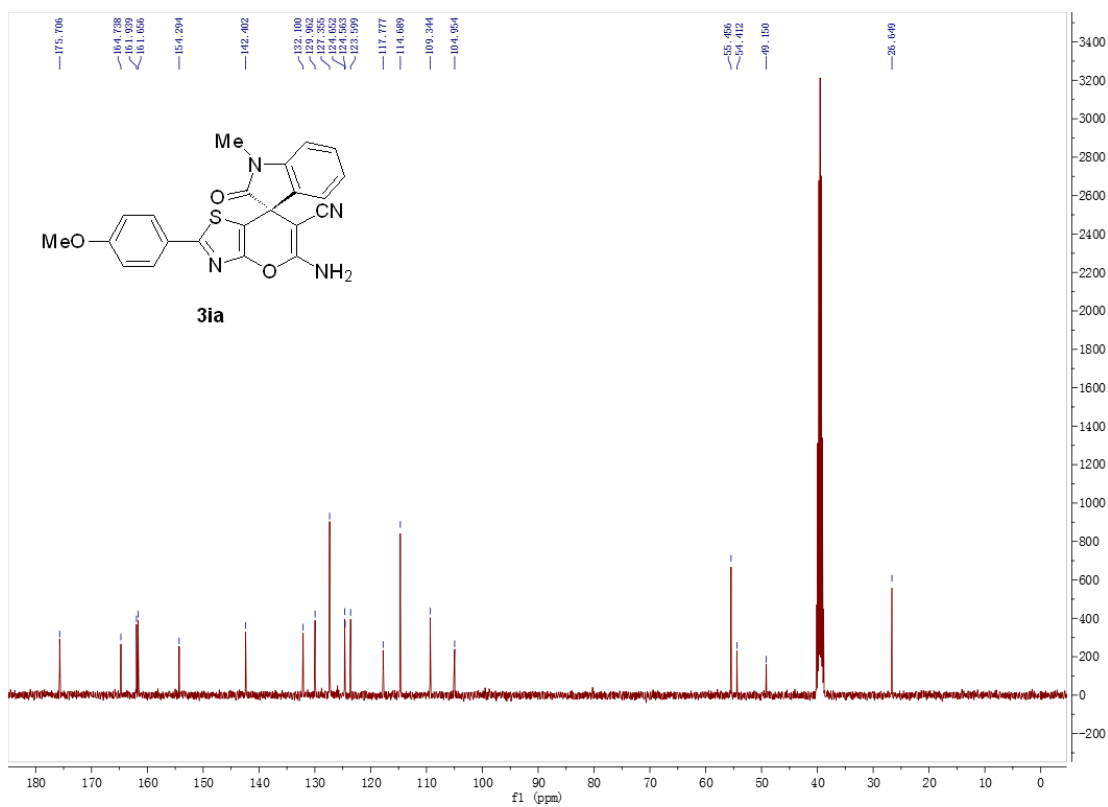

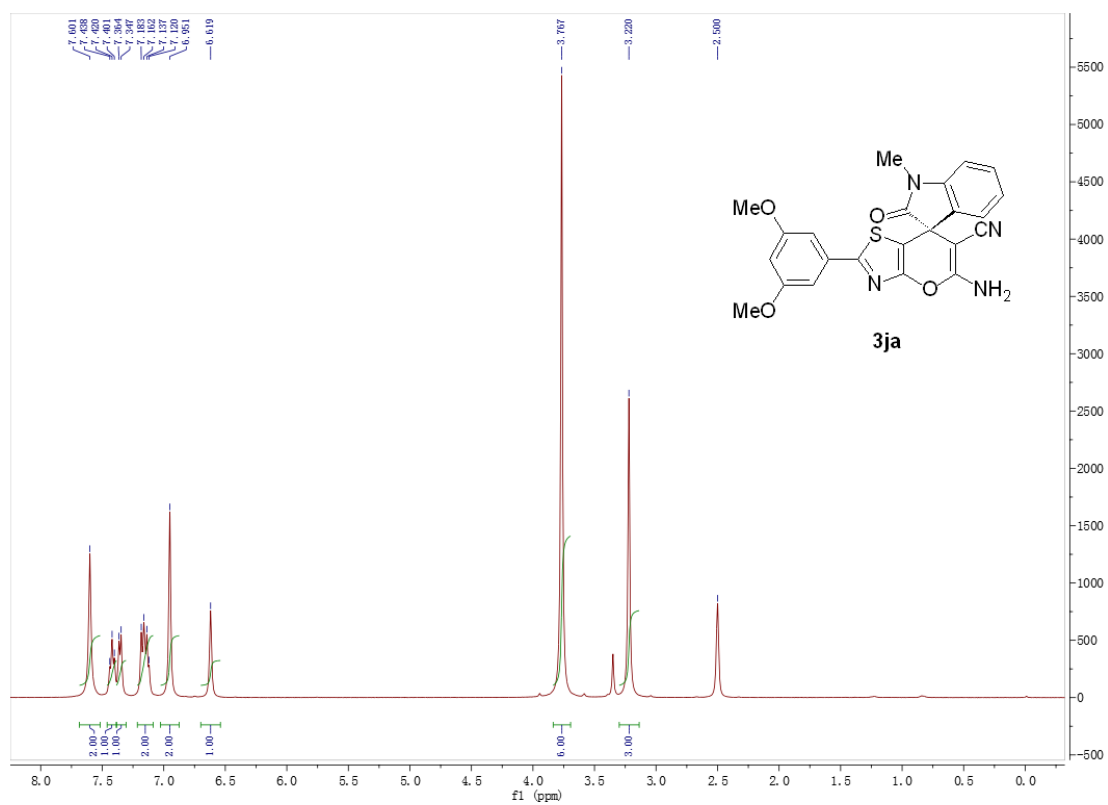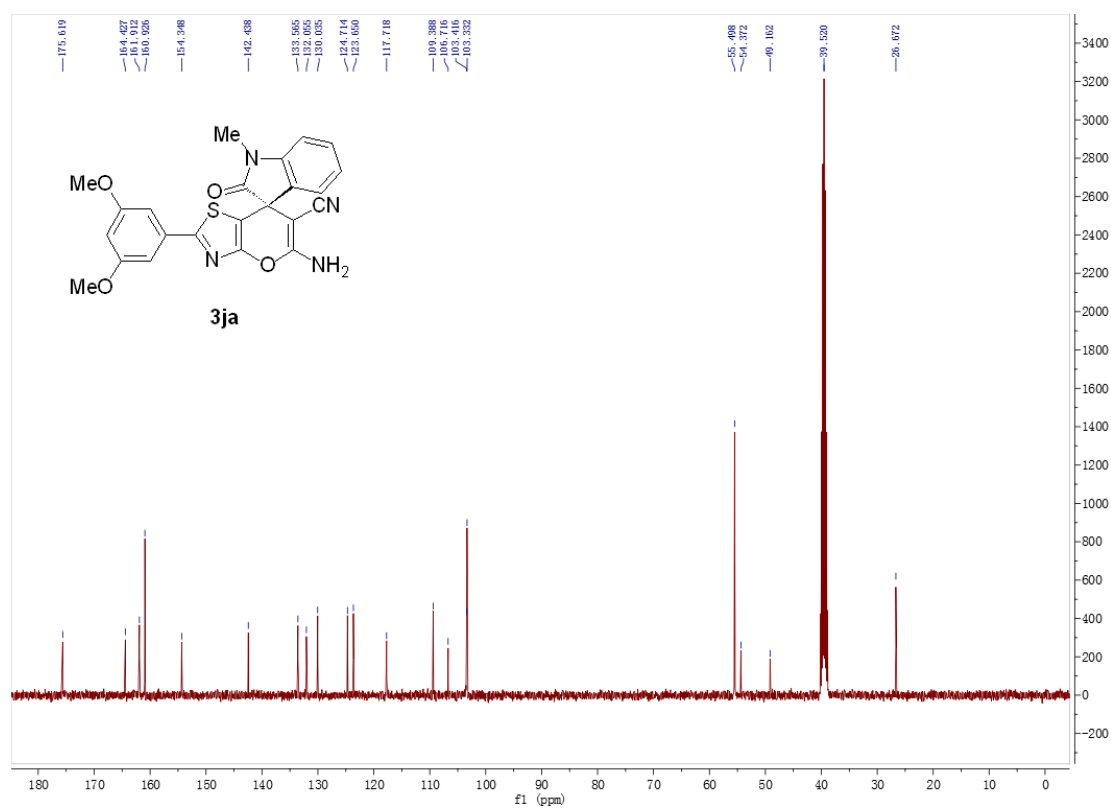

### 3. Copies of HRMS Spectra

|                      |          |                    |           |                        |              |                               |                     |
|----------------------|----------|--------------------|-----------|------------------------|--------------|-------------------------------|---------------------|
| <b>Sample Name</b>   | Sample55 | <b>Position</b>    | P2-A1     | <b>Instrument Name</b> | Instrument 1 | <b>User Name</b>              |                     |
| <b>Inj Vol</b>       | -1       | <b>InjPosition</b> |           | <b>SampleType</b>      | Sample       | <b>IRM Calibration Status</b> | Some Ions Missed    |
| <b>Data Filename</b> | CLY-S1.d | <b>ACQ Method</b>  | chen-ms.m | <b>Comment</b>         |              | <b>Acquired Time</b>          | 1/6/2016 8:37:54 PM |

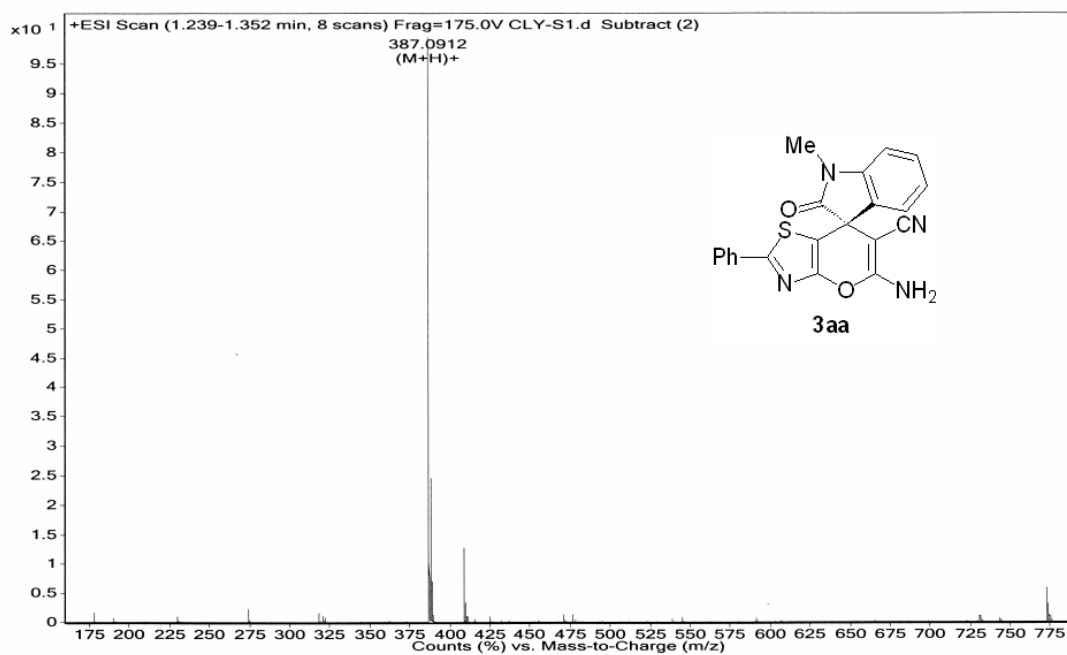

|                      |           |                    |           |                        |              |                               |                      |
|----------------------|-----------|--------------------|-----------|------------------------|--------------|-------------------------------|----------------------|
| <b>Sample Name</b>   | Sample71  | <b>Position</b>    | P2-B8     | <b>Instrument Name</b> | Instrument 1 | <b>User Name</b>              |                      |
| <b>Inj Vol</b>       | -1        | <b>InjPosition</b> |           | <b>SampleType</b>      | Sample       | <b>IRM Calibration Status</b> | Some Ions Missed     |
| <b>Data Filename</b> | CLY-S17.d | <b>ACQ Method</b>  | chen-ms.m | <b>Comment</b>         |              | <b>Acquired Time</b>          | 1/6/2016 10:01:40 PM |

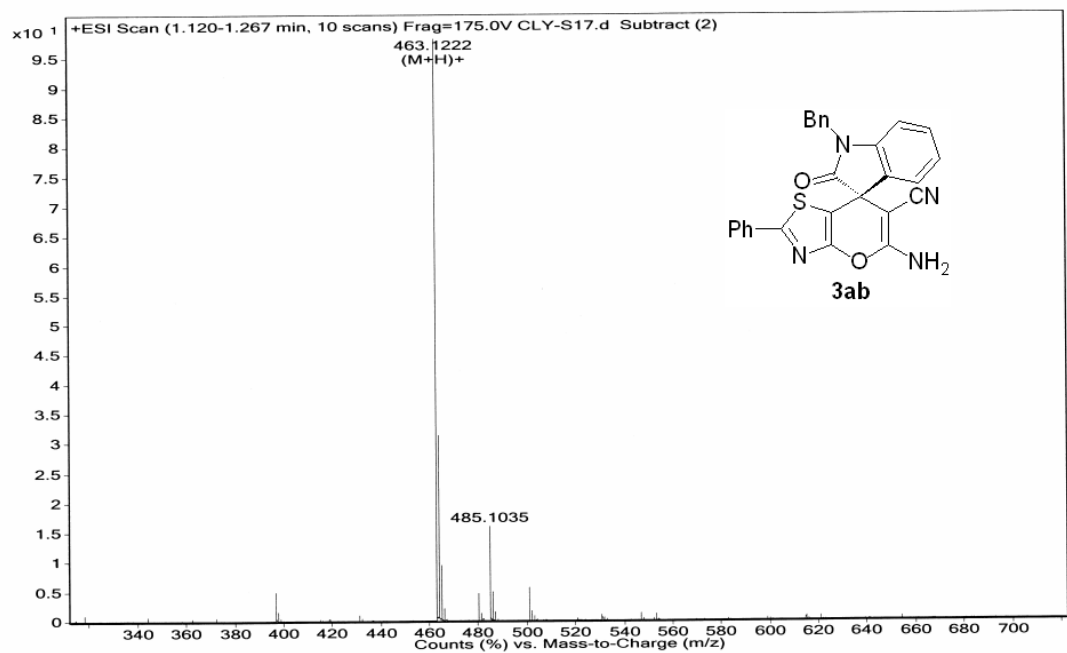

|                      |          |                    |           |                        |              |                               |                     |
|----------------------|----------|--------------------|-----------|------------------------|--------------|-------------------------------|---------------------|
| <b>Sample Name</b>   | Sample56 | <b>Position</b>    | P2-A2     | <b>Instrument Name</b> | Instrument 1 | <b>User Name</b>              |                     |
| <b>Inj Vol</b>       | -1       | <b>InjPosition</b> |           | <b>SampleType</b>      | Sample       | <b>IRM Calibration Status</b> | Some Ions Missed    |
| <b>Data Filename</b> | CLY-S2.d | <b>ACQ Method</b>  | chen-ms.m | <b>Comment</b>         |              | <b>Acquired Time</b>          | 1/6/2016 8:43:06 PM |

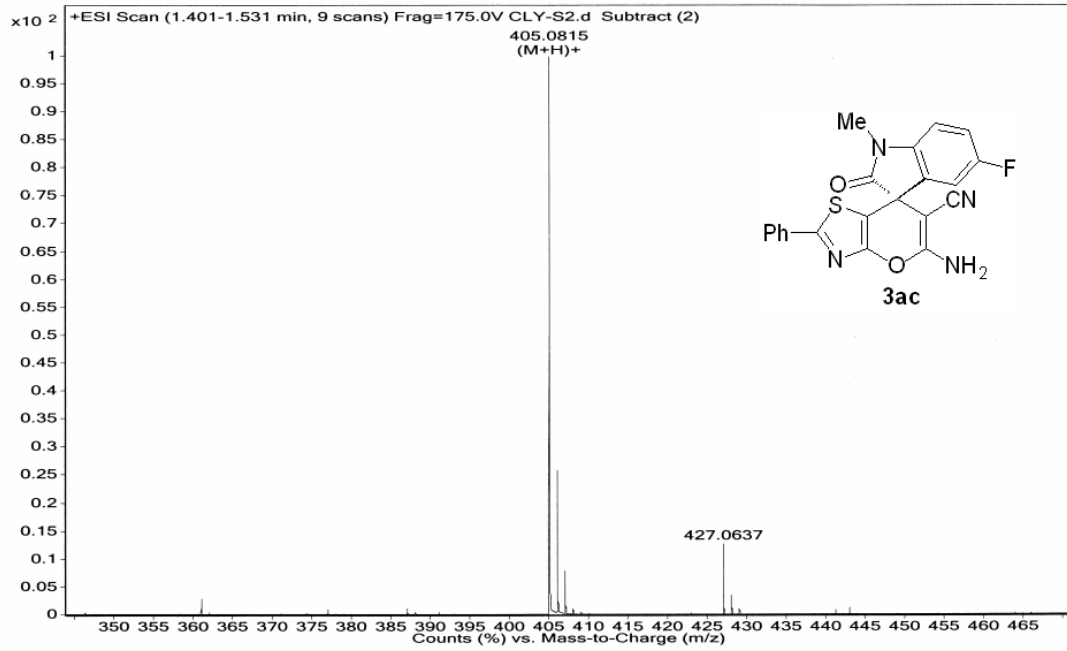

|                      |          |                    |           |                        |              |                               |                     |
|----------------------|----------|--------------------|-----------|------------------------|--------------|-------------------------------|---------------------|
| <b>Sample Name</b>   | Sample57 | <b>Position</b>    | P2-A3     | <b>Instrument Name</b> | Instrument 1 | <b>User Name</b>              |                     |
| <b>Inj Vol</b>       | -1       | <b>InjPosition</b> |           | <b>SampleType</b>      | Sample       | <b>IRM Calibration Status</b> | Some Ions Missed    |
| <b>Data Filename</b> | CLY-S3.d | <b>ACQ Method</b>  | chen-ms.m | <b>Comment</b>         |              | <b>Acquired Time</b>          | 1/6/2016 8:48:22 PM |

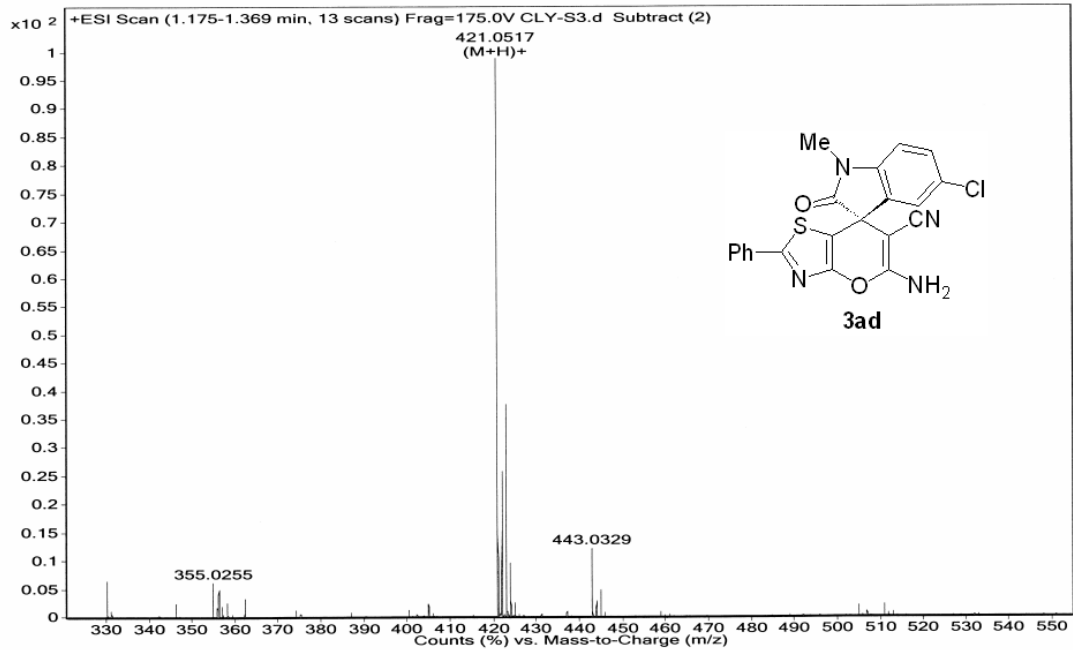

|                      |          |                    |           |                        |              |                               |                     |
|----------------------|----------|--------------------|-----------|------------------------|--------------|-------------------------------|---------------------|
| <b>Sample Name</b>   | Sample61 | <b>Position</b>    | P2-A7     | <b>Instrument Name</b> | Instrument 1 | <b>User Name</b>              |                     |
| <b>Inj Vol</b>       | -1       | <b>InjPosition</b> |           | <b>SampleType</b>      | Sample       | <b>IRM Calibration Status</b> | Some Ions Missed    |
| <b>Data Filename</b> | CLY-S7.d | <b>ACQ Method</b>  | chen-ms.m | <b>Comment</b>         |              | <b>Acquired Time</b>          | 1/6/2016 9:09:14 PM |

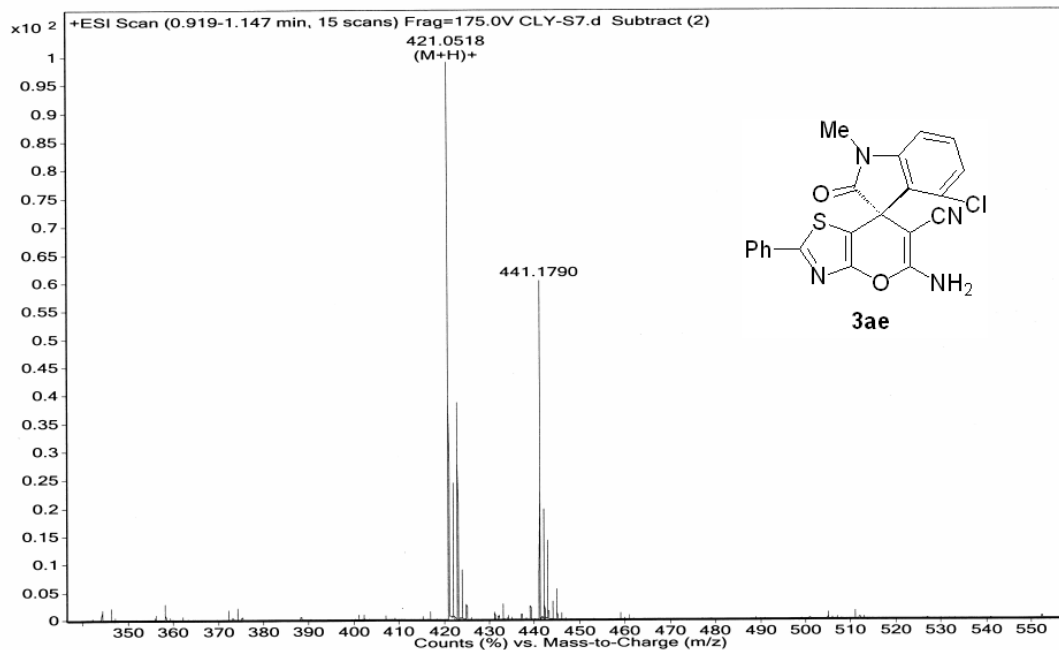

|                      |          |                    |           |                        |              |                               |                     |
|----------------------|----------|--------------------|-----------|------------------------|--------------|-------------------------------|---------------------|
| <b>Sample Name</b>   | Sample58 | <b>Position</b>    | P2-A4     | <b>Instrument Name</b> | Instrument 1 | <b>User Name</b>              |                     |
| <b>Inj Vol</b>       | -1       | <b>InjPosition</b> |           | <b>SampleType</b>      | Sample       | <b>IRM Calibration Status</b> | Some Ions Missed    |
| <b>Data Filename</b> | CLY-S4.d | <b>ACQ Method</b>  | chen-ms.m | <b>Comment</b>         |              | <b>Acquired Time</b>          | 1/6/2016 8:53:38 PM |

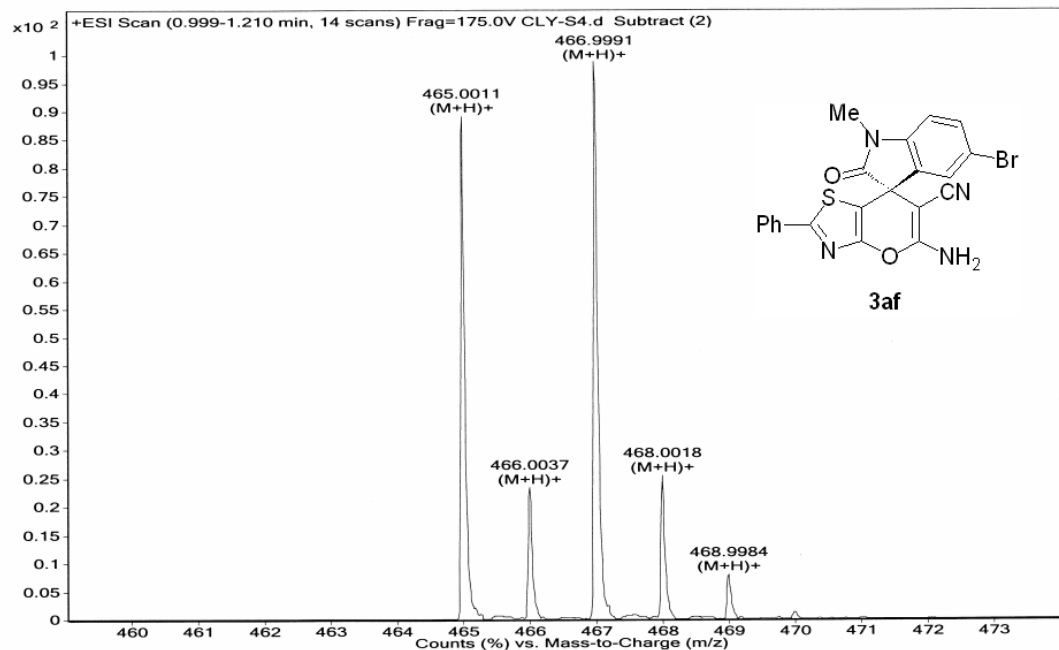

|               |          |             |           |                 |              |                        |                     |
|---------------|----------|-------------|-----------|-----------------|--------------|------------------------|---------------------|
| Sample Name   | Sample59 | Position    | P2-A5     | Instrument Name | Instrument 1 | User Name              |                     |
| Inj Vol       | -1       | InjPosition |           | SampleType      | Sample       | IRM Calibration Status | Some Ions Missed    |
| Data Filename | CLY-S5.d | ACQ Method  | chen-ms.m | Comment         |              | Acquired Time          | 1/6/2016 8:58:48 PM |

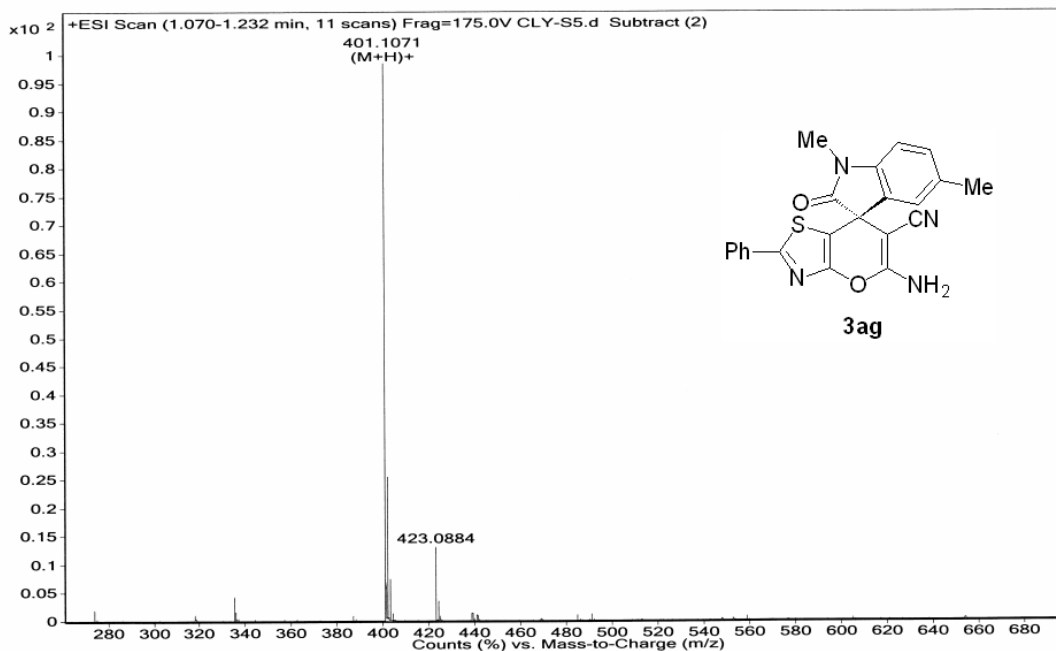

|               |          |             |           |                 |              |                        |                     |
|---------------|----------|-------------|-----------|-----------------|--------------|------------------------|---------------------|
| Sample Name   | Sample60 | Position    | P2-A6     | Instrument Name | Instrument 1 | User Name              |                     |
| Inj Vol       | -1       | InjPosition |           | SampleType      | Sample       | IRM Calibration Status | Some Ions Missed    |
| Data Filename | CLY-S6.d | ACQ Method  | chen-ms.m | Comment         |              | Acquired Time          | 1/6/2016 9:04:03 PM |

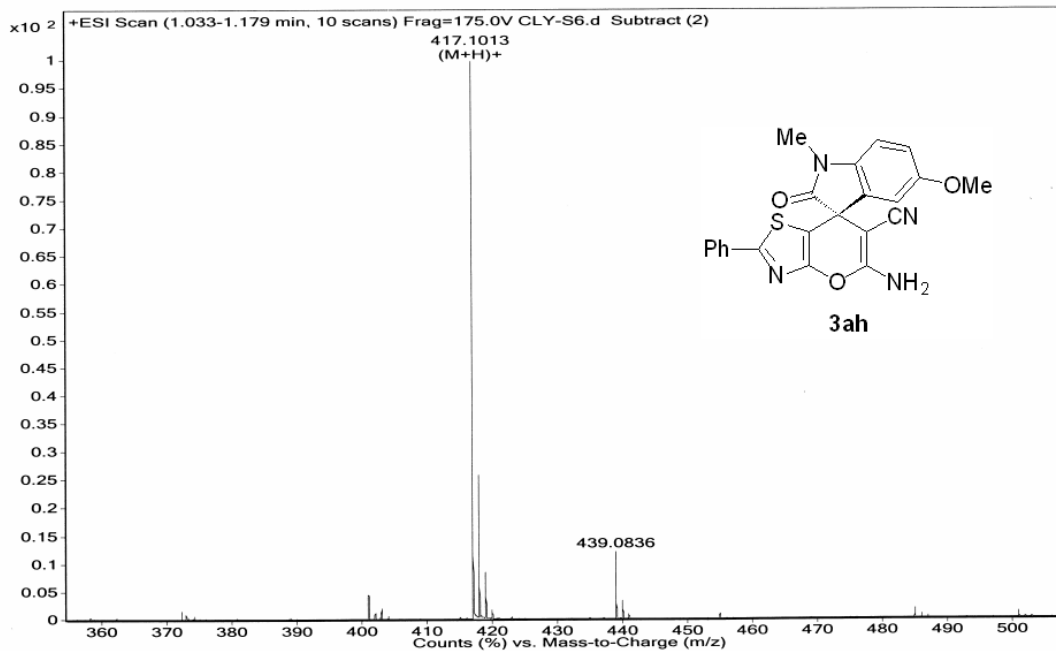

|               |           |             |           |                 |              |                        |                     |
|---------------|-----------|-------------|-----------|-----------------|--------------|------------------------|---------------------|
| Sample Name   | Sample66  | Position    | P2-B3     | Instrument Name | Instrument 1 | User Name              |                     |
| Inj Vol       | -1        | InjPosition |           | SampleType      | Sample       | IRM Calibration Status | Some Ions Missed    |
| Data Filename | CLY-S12.d | ACQ Method  | chen-ms.m | Comment         |              | Acquired Time          | 1/6/2016 9:35:29 PM |

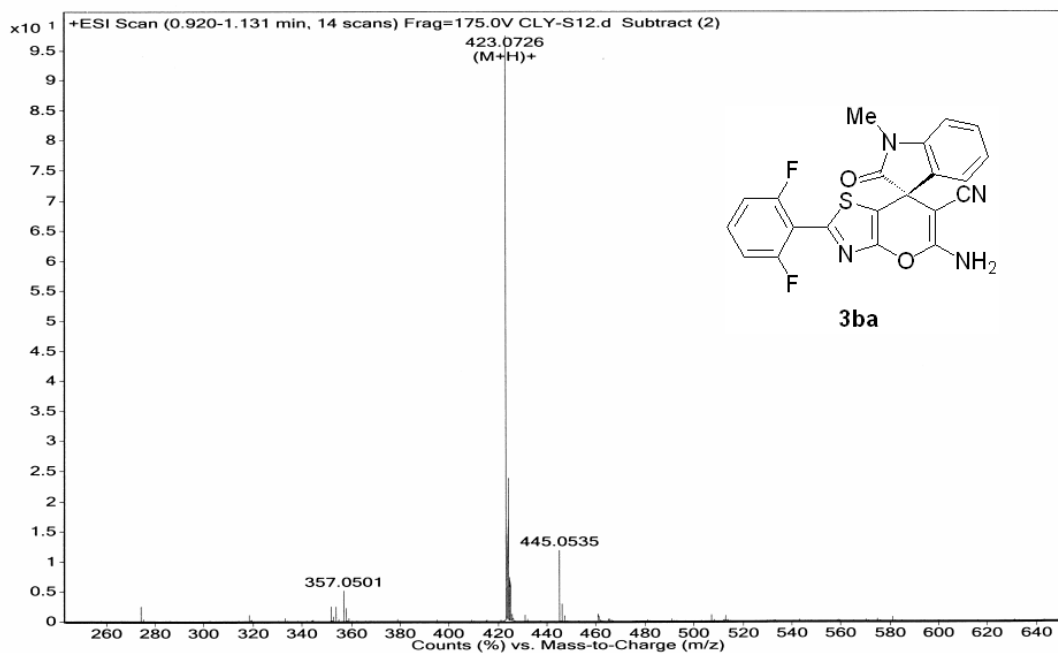

|               |          |             |           |                 |              |                        |                     |
|---------------|----------|-------------|-----------|-----------------|--------------|------------------------|---------------------|
| Sample Name   | Sample62 | Position    | P2-A8     | Instrument Name | Instrument 1 | User Name              |                     |
| Inj Vol       | -1       | InjPosition |           | SampleType      | Sample       | IRM Calibration Status | Some Ions Missed    |
| Data Filename | CLY-S8.d | ACQ Method  | chen-ms.m | Comment         |              | Acquired Time          | 1/6/2016 9:14:25 PM |

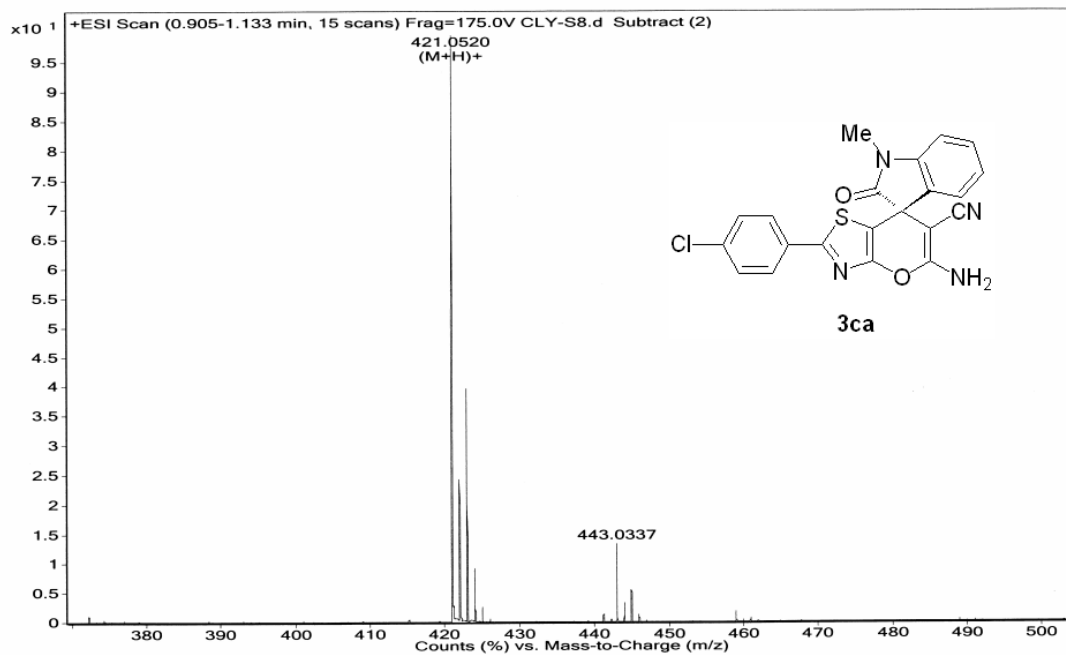

|                      |           |                    |           |                        |              |                               |                     |
|----------------------|-----------|--------------------|-----------|------------------------|--------------|-------------------------------|---------------------|
| <b>Sample Name</b>   | Sample65  | <b>Position</b>    | P2-B2     | <b>Instrument Name</b> | Instrument 1 | <b>User Name</b>              |                     |
| <b>Inj Vol</b>       | -1        | <b>InjPosition</b> |           | <b>SampleType</b>      | Sample       | <b>IRM Calibration Status</b> | Some Ions Missed    |
| <b>Data Filename</b> | CLY-S11.d | <b>ACQ Method</b>  | chen-ms.m | <b>Comment</b>         |              | <b>Acquired Time</b>          | 1/6/2016 9:30:12 PM |

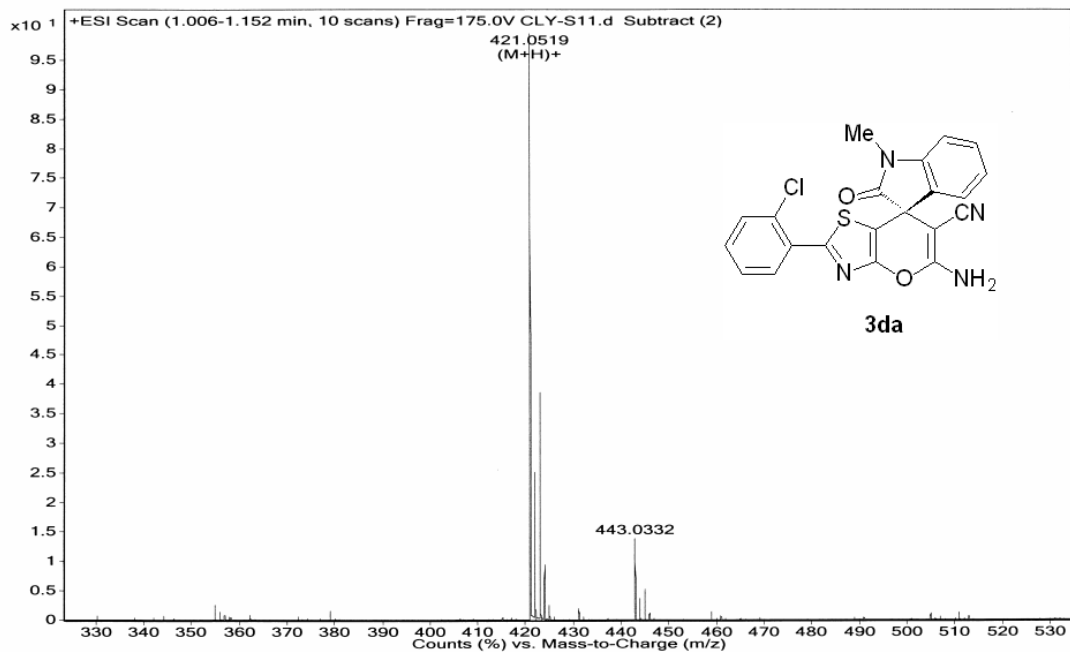

|                      |           |                    |           |                        |              |                               |                     |
|----------------------|-----------|--------------------|-----------|------------------------|--------------|-------------------------------|---------------------|
| <b>Sample Name</b>   | Sample70  | <b>Position</b>    | P2-B7     | <b>Instrument Name</b> | Instrument 1 | <b>User Name</b>              |                     |
| <b>Inj Vol</b>       | -1        | <b>InjPosition</b> |           | <b>SampleType</b>      | Sample       | <b>IRM Calibration Status</b> | Some Ions Missed    |
| <b>Data Filename</b> | CLY-S16.d | <b>ACQ Method</b>  | chen-ms.m | <b>Comment</b>         |              | <b>Acquired Time</b>          | 1/6/2016 9:56:21 PM |

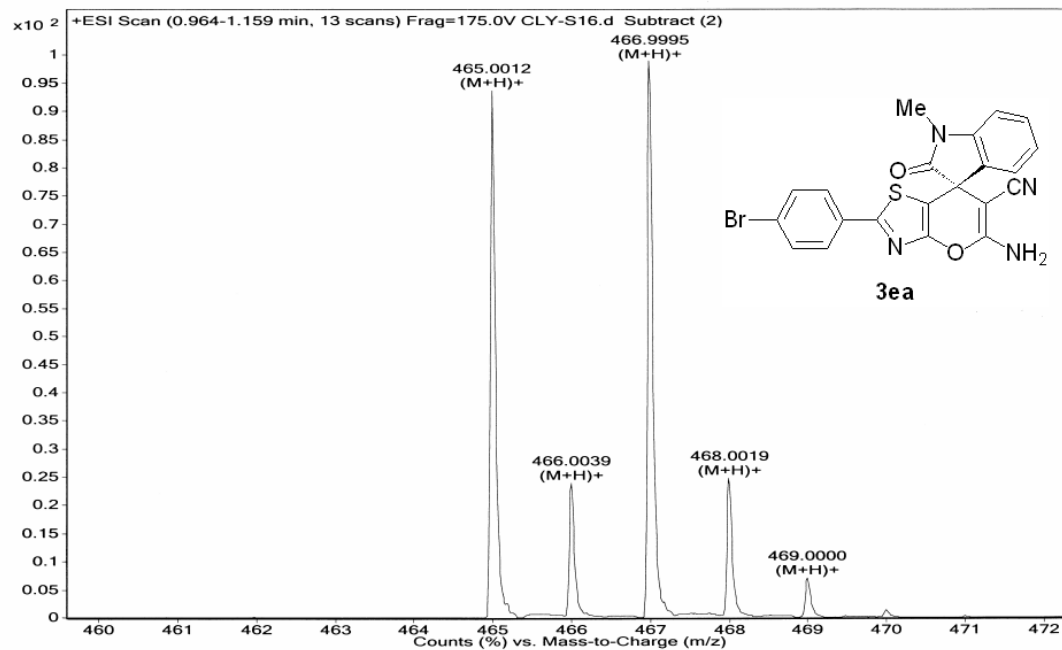



|               |           |             |           |                 |              |                        |                     |
|---------------|-----------|-------------|-----------|-----------------|--------------|------------------------|---------------------|
| Sample Name   | Sample69  | Position    | P2-B6     | Instrument Name | Instrument 1 | User Name              |                     |
| Inj Vol       | -1        | InjPosition |           | SampleType      | Sample       | IRM Calibration Status | Some Ions Missed    |
| Data Filename | CLY-S15.d | ACQ Method  | chen-ms.m | Comment         |              | Acquired Time          | 1/6/2016 9:51:09 PM |

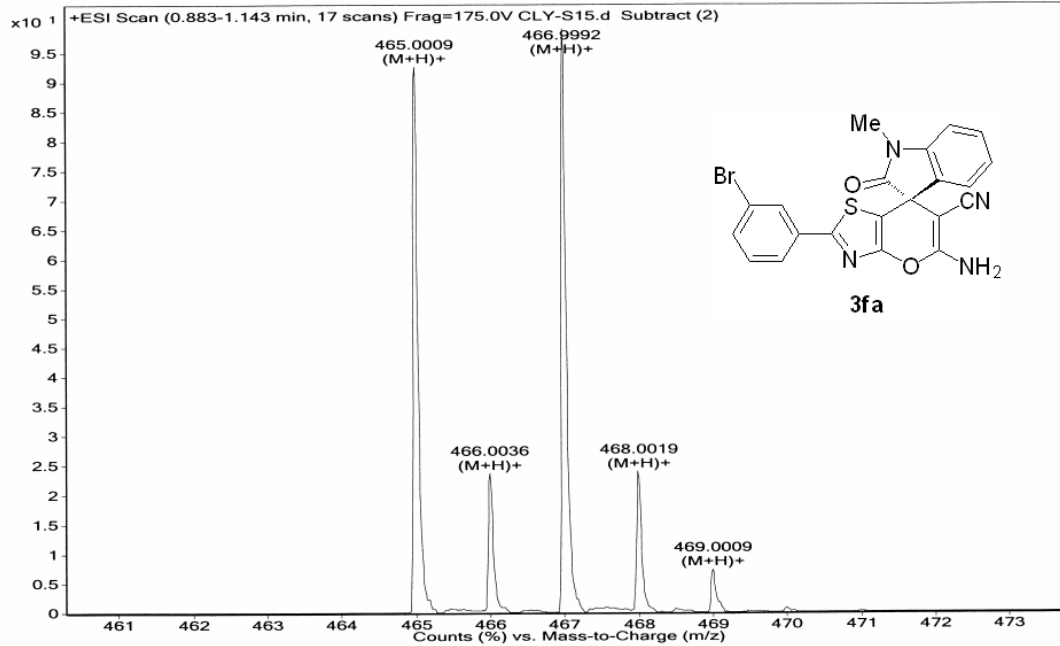

|               |          |             |           |                 |              |                        |                     |
|---------------|----------|-------------|-----------|-----------------|--------------|------------------------|---------------------|
| Sample Name   | Sample63 | Position    | P2-A9     | Instrument Name | Instrument 1 | User Name              |                     |
| Inj Vol       | -1       | InjPosition |           | SampleType      | Sample       | IRM Calibration Status | Some Ions Missed    |
| Data Filename | CLY-S9.d | ACQ Method  | chen-ms.m | Comment         |              | Acquired Time          | 1/6/2016 9:19:41 PM |

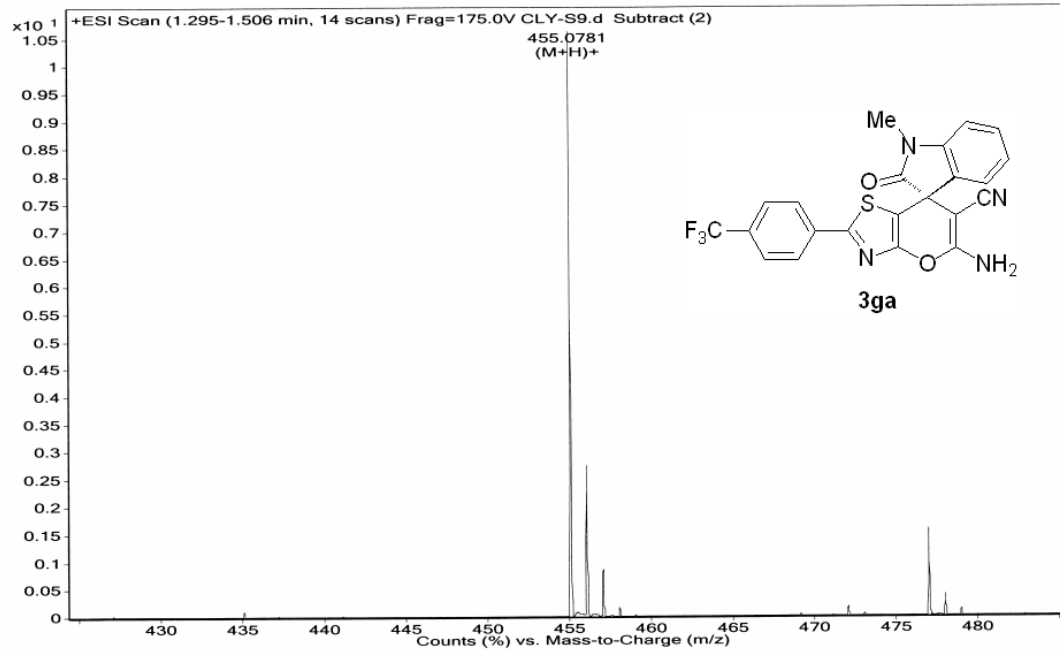

|               |           |             |           |                 |              |                        |                     |
|---------------|-----------|-------------|-----------|-----------------|--------------|------------------------|---------------------|
| Sample Name   | Sample67  | Position    | P2-B4     | Instrument Name | Instrument 1 | User Name              |                     |
| Inj Vol       | -1        | InjPosition |           | SampleType      | Sample       | IRM Calibration Status | Some Ions Missed    |
| Data Filename | CLY-S13.d | ACQ Method  | chen-ms.m | Comment         |              | Acquired Time          | 1/6/2016 9:40:42 PM |

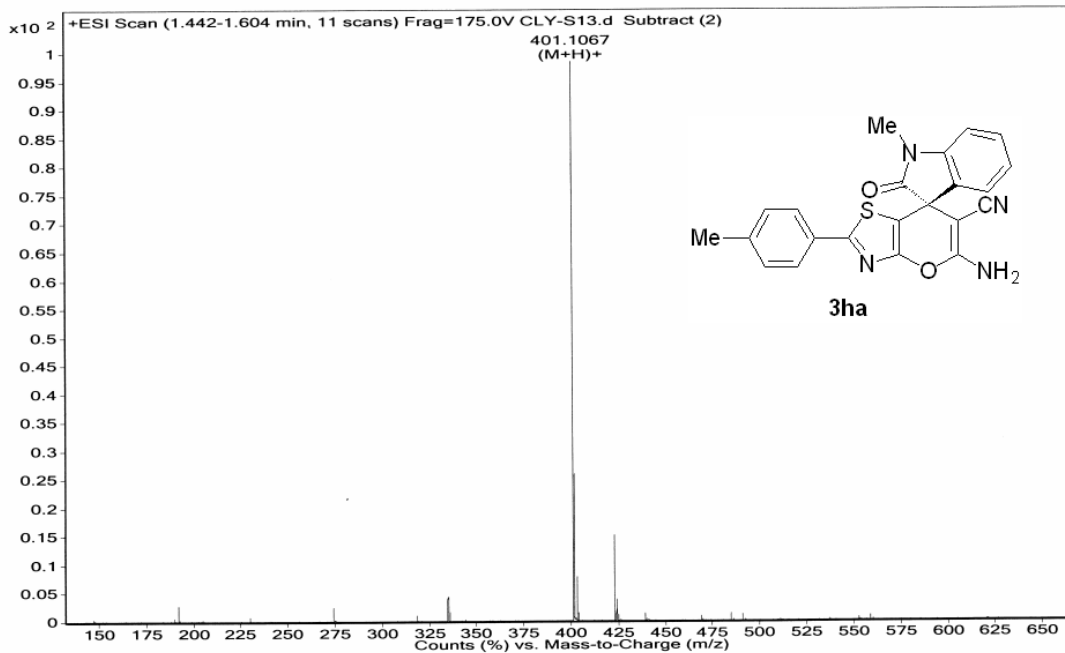

|               |           |             |           |                 |              |                        |                     |
|---------------|-----------|-------------|-----------|-----------------|--------------|------------------------|---------------------|
| Sample Name   | Sample64  | Position    | P2-B1     | Instrument Name | Instrument 1 | User Name              |                     |
| Inj Vol       | -1        | InjPosition |           | SampleType      | Sample       | IRM Calibration Status | Some Ions Missed    |
| Data Filename | CLY-S10.d | ACQ Method  | chen-ms.m | Comment         |              | Acquired Time          | 1/6/2016 9:24:58 PM |

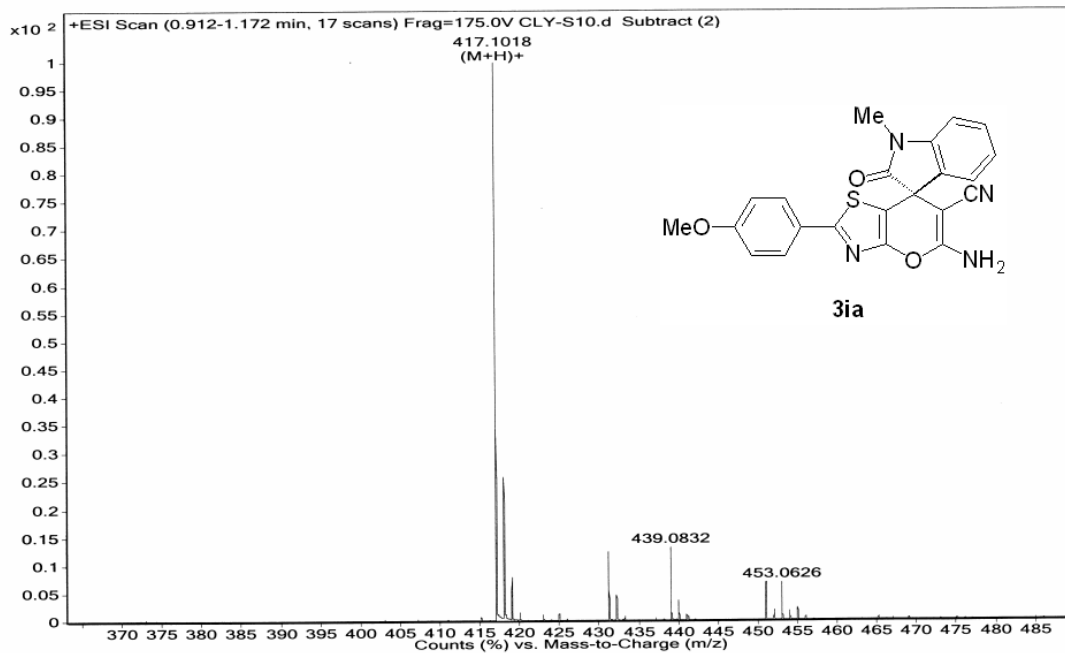

**Sample Name** Sample68      **Position** P2-B5      **Instrument Name** Instrument 1      **User Name**  
**Inj Vol** -1      **InjPosition**      **SampleType** Sample      **IRM Calibration Status**  
**Data Filename** CLY-S14.d      **ACQ Method** chen-ms.m      **Comment**      **Acquired Time** 1/6/2016 9:45:54 PM

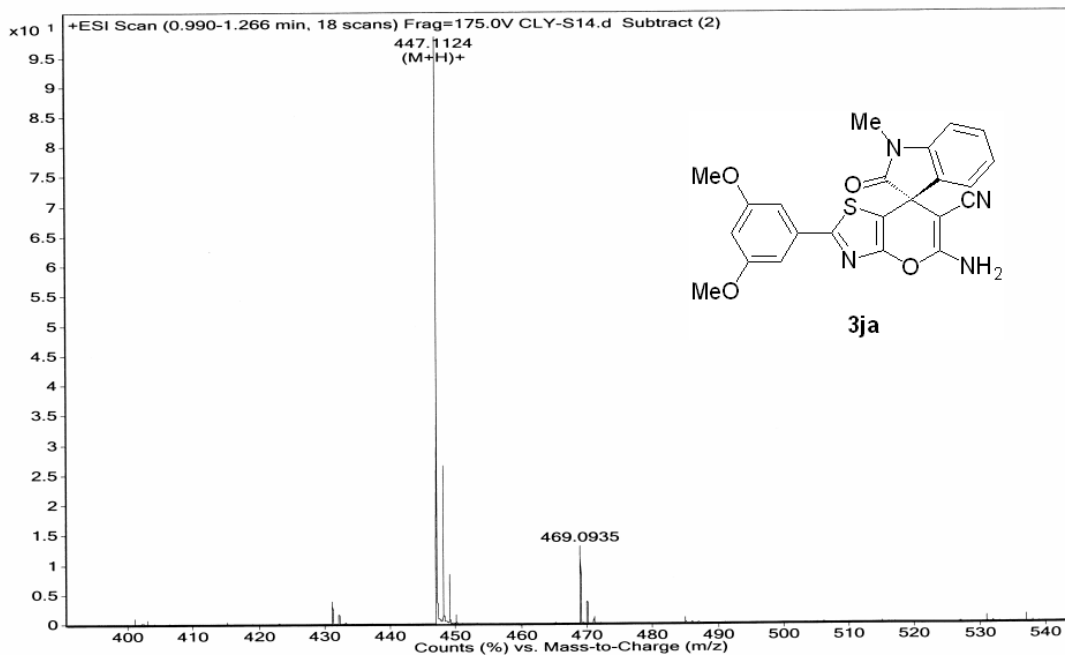

#### 4. Copies of HPLC Spectra

##### <Chromatogram>

mV

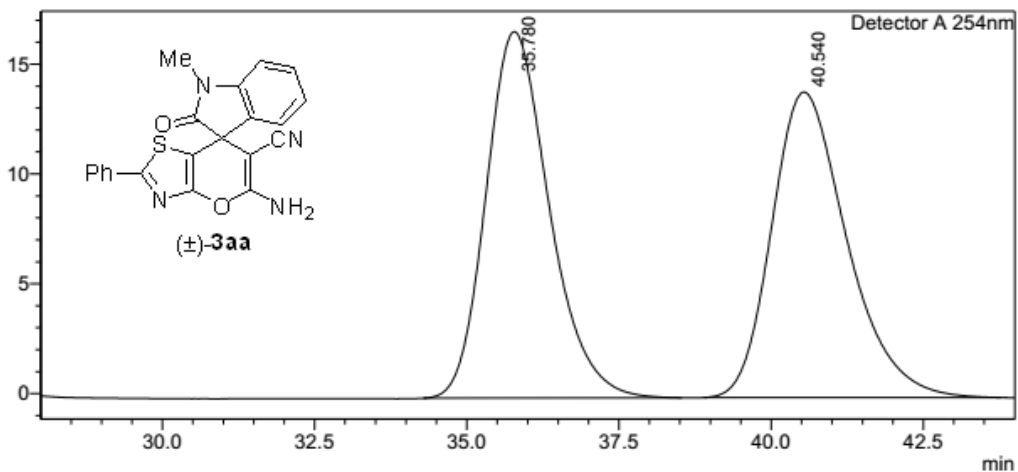

##### <Peak Table>

Detector A 254nm

| Peak# | Ret. Time | Area    | Height | Conc.  | Unit | Mark | Name |
|-------|-----------|---------|--------|--------|------|------|------|
| 1     | 35.780    | 1206943 | 16681  | 50.268 |      |      |      |
| 2     | 40.540    | 1194083 | 13907  | 49.732 |      |      |      |
| Total |           | 2401026 | 30588  |        |      |      |      |

### <Chromatogram>

mV

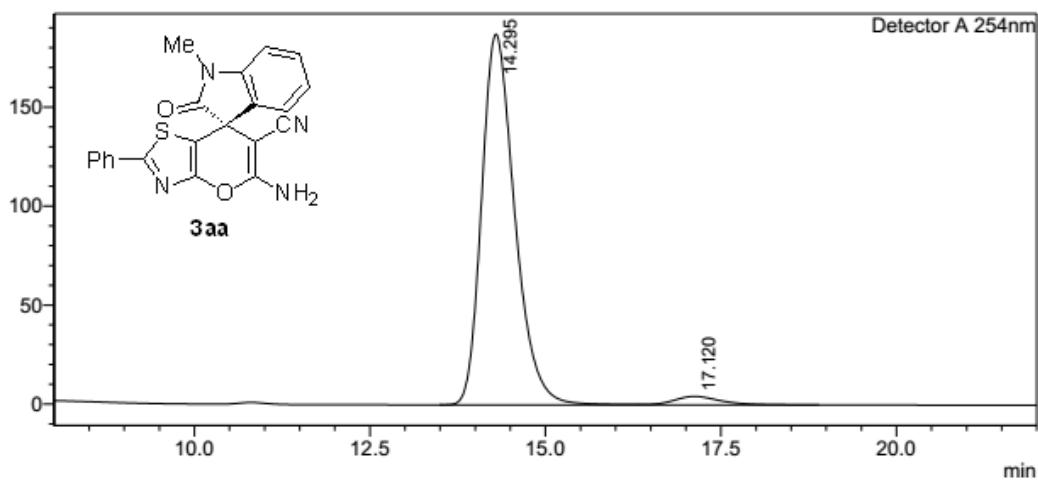

### <Peak Table>

Detector A 254nm

| Peak# | Ret. Time | Area    | Height | Conc.  | Unit | Mark | Name |
|-------|-----------|---------|--------|--------|------|------|------|
| 1     | 14.295    | 6151300 | 187120 | 96.896 |      |      |      |
| 2     | 17.120    | 197037  | 4280   | 3.104  |      | V    |      |
| Total |           | 6348337 | 191401 |        |      |      |      |

### <Chromatogram>

mV

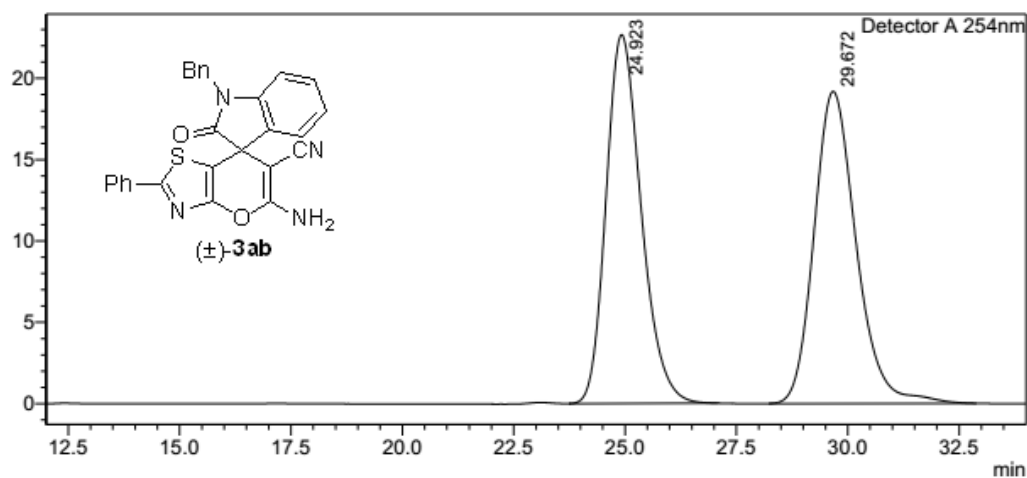

### <Peak Table>

Detector A 254nm

| Peak# | Ret. Time | Area    | Height | Conc.  | Unit | Mark | Name |
|-------|-----------|---------|--------|--------|------|------|------|
| 1     | 24.923    | 1243876 | 22672  | 49.628 |      |      |      |
| 2     | 29.672    | 1262546 | 19187  | 50.372 |      |      |      |
| Total |           | 2506422 | 41858  |        |      |      |      |

### <Chromatogram>

mV

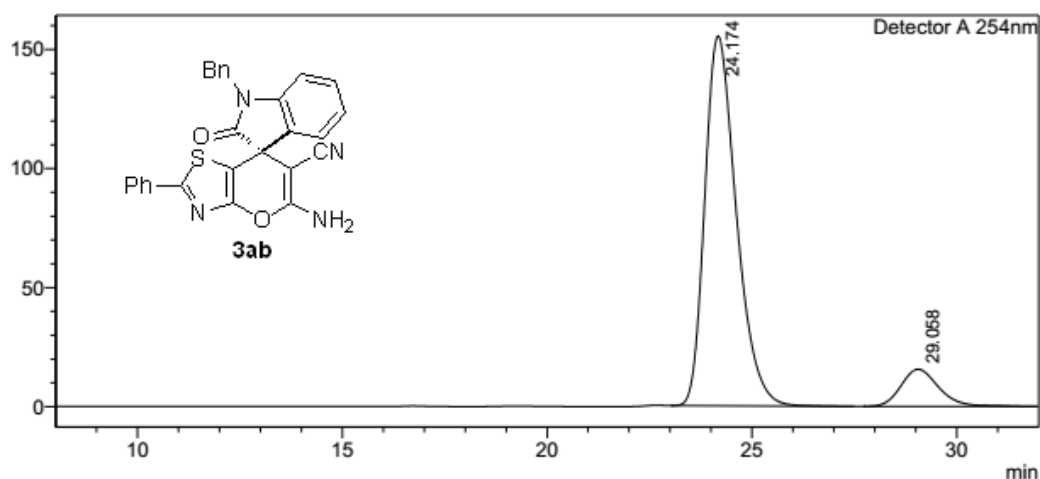

### <Peak Table>

Detector A 254nm

| Peak# | Ret. Time | Area    | Height | Conc.  | Unit | Mark | Name |
|-------|-----------|---------|--------|--------|------|------|------|
| 1     | 24.174    | 8322625 | 155365 | 89.225 |      |      |      |
| 2     | 29.058    | 1005053 | 15603  | 10.775 |      |      |      |
| Total |           | 9327678 | 170968 |        |      |      |      |

### <Chromatogram>

mV

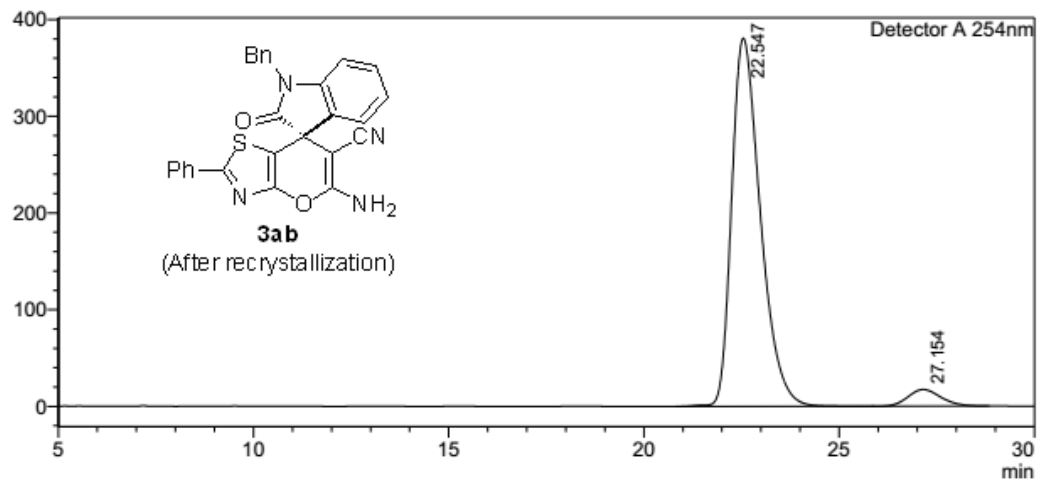

### <Peak Table>

Detector A 254nm

| Peak# | Ret. Time | Area     | Height | Conc.  | Unit | Mark | Name |
|-------|-----------|----------|--------|--------|------|------|------|
| 1     | 22.547    | 19500152 | 380594 | 95.077 |      |      |      |
| 2     | 27.154    | 1009725  | 17202  | 4.923  |      |      |      |
| Total |           | 20509876 | 397796 |        |      |      |      |

### <Chromatogram>

mV

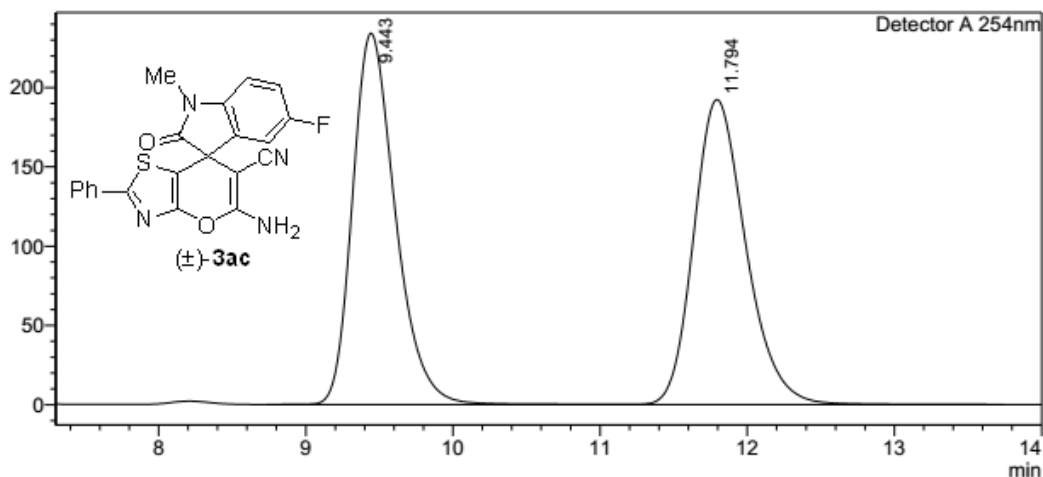

### <Peak Table>

Detector A 254nm

| Peak# | Ret. Time | Area    | Height | Conc.  | Unit | Mark | Name |
|-------|-----------|---------|--------|--------|------|------|------|
| 1     | 9.443     | 4748893 | 234130 | 50.032 |      |      |      |
| 2     | 11.794    | 4742887 | 192286 | 49.968 |      | V    |      |
| Total |           | 9491779 | 426416 |        |      |      |      |

### <Chromatogram>

mV

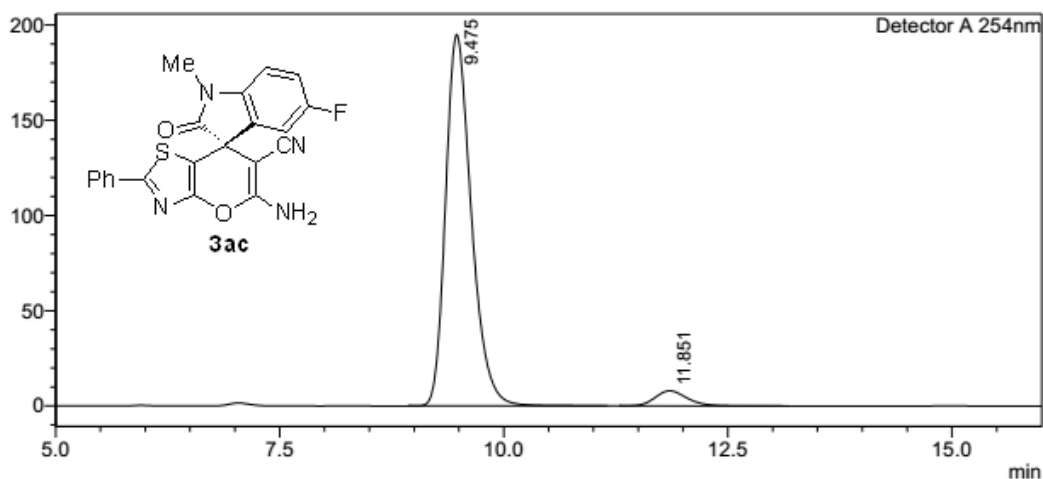

### <Peak Table>

Detector A 254nm

| Peak# | Ret. Time | Area    | Height | Conc.  | Unit | Mark | Name |
|-------|-----------|---------|--------|--------|------|------|------|
| 1     | 9.475     | 3899520 | 194980 | 95.201 |      |      |      |
| 2     | 11.851    | 196587  | 7909   | 4.799  |      |      |      |
| Total |           | 4096107 | 202890 |        |      |      |      |

### <Chromatogram>

mV

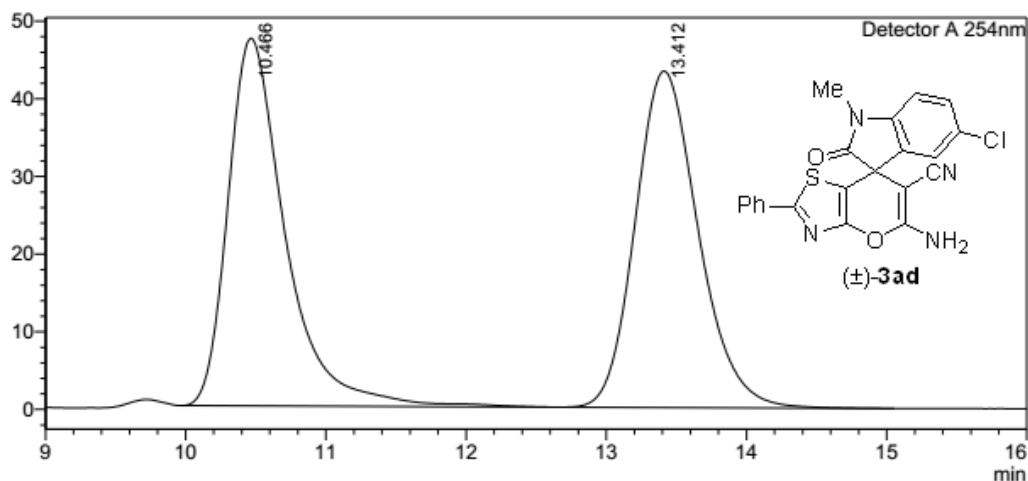

### <Peak Table>

Detector A 254nm

| Peak# | Ret. Time | Area    | Height | Conc.  | Unit | Mark | Name |
|-------|-----------|---------|--------|--------|------|------|------|
| 1     | 10.466    | 1345431 | 47340  | 49.801 |      |      |      |
| 2     | 13.412    | 1356204 | 43329  | 50.199 |      |      |      |
| Total |           | 2701636 | 90669  |        |      |      |      |

### <Chromatogram>

mV

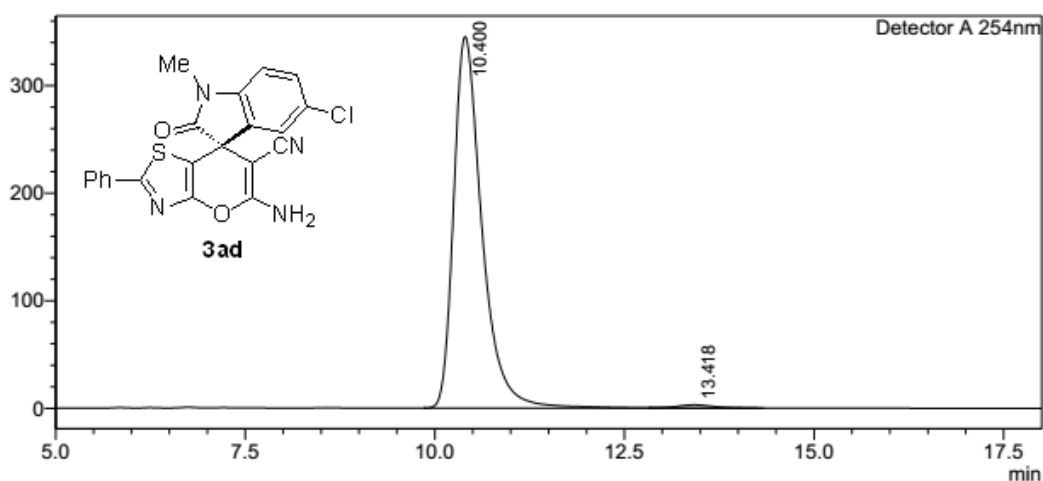

### <Peak Table>

Detector A 254nm

| Peak# | Ret. Time | Area    | Height | Conc.  | Unit | Mark | Name |
|-------|-----------|---------|--------|--------|------|------|------|
| 1     | 10.400    | 8969659 | 345268 | 99.060 |      | S    |      |
| 2     | 13.418    | 85099   | 2802   | 0.940  |      | T    |      |
| Total |           | 9054758 | 348071 |        |      |      |      |

### <Chromatogram>

mV

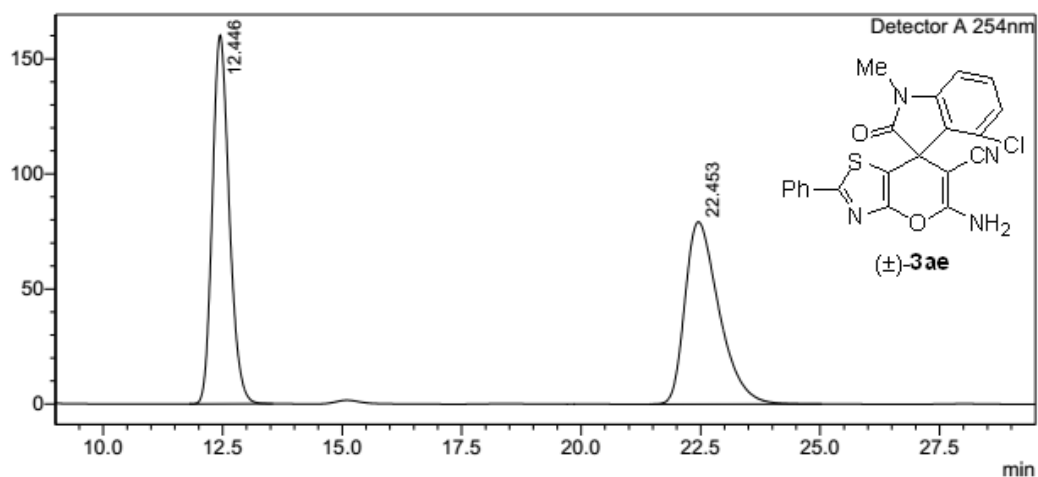

### <Peak Table>

Detector A 254nm

| Peak# | Ret. Time | Area    | Height | Conc.  | Unit | Mark | Name |
|-------|-----------|---------|--------|--------|------|------|------|
| 1     | 12.446    | 3935276 | 160166 | 50.056 |      |      |      |
| 2     | 22.453    | 3926474 | 79148  | 49.944 |      |      |      |
| Total |           | 7861750 | 239314 |        |      |      |      |

### <Chromatogram>

mV

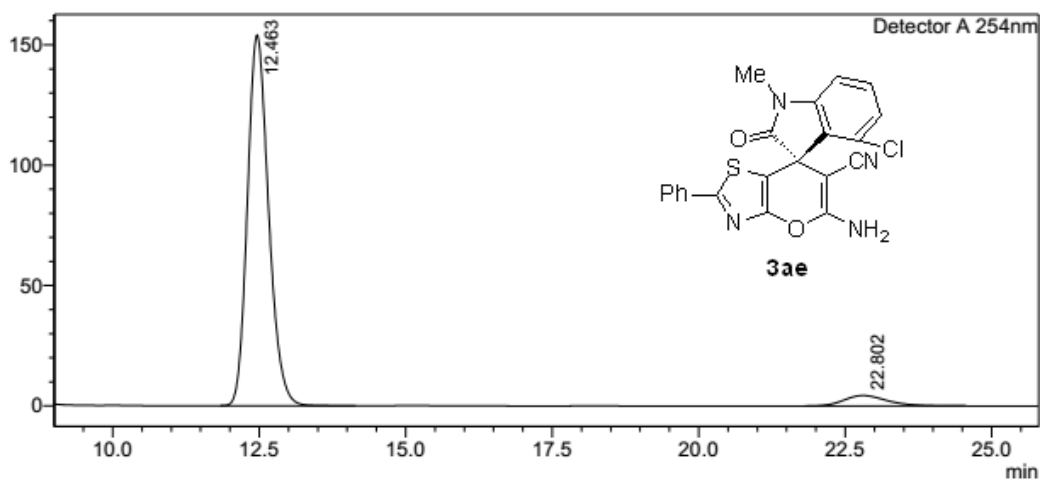

### <Peak Table>

Detector A 254nm

| Peak# | Ret. Time | Area    | Height | Conc.  | Unit | Mark | Name |
|-------|-----------|---------|--------|--------|------|------|------|
| 1     | 12.463    | 3871293 | 153965 | 94.604 |      |      |      |
| 2     | 22.802    | 220792  | 4332   | 5.396  |      |      |      |
| Total |           | 4092085 | 158297 |        |      |      |      |



### <Chromatogram>

mV

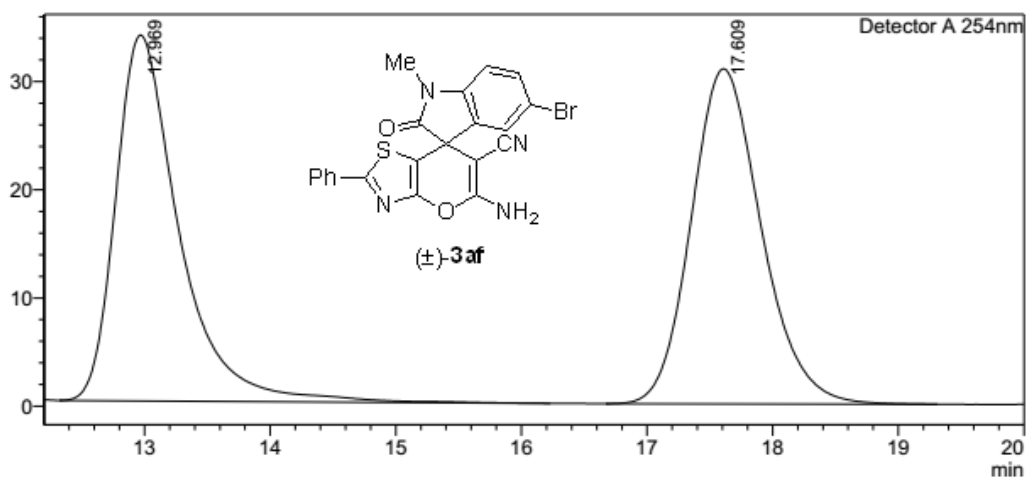

### <Peak Table>

Detector A 254nm

| Peak# | Ret. Time | Area    | Height | Conc.  | Unit | Mark | Name |
|-------|-----------|---------|--------|--------|------|------|------|
| 1     | 12.969    | 1187343 | 33815  | 49.692 |      |      |      |
| 2     | 17.609    | 1202083 | 30967  | 50.308 |      |      |      |
| Total |           | 2389426 | 64782  |        |      |      |      |

### <Chromatogram>

mV

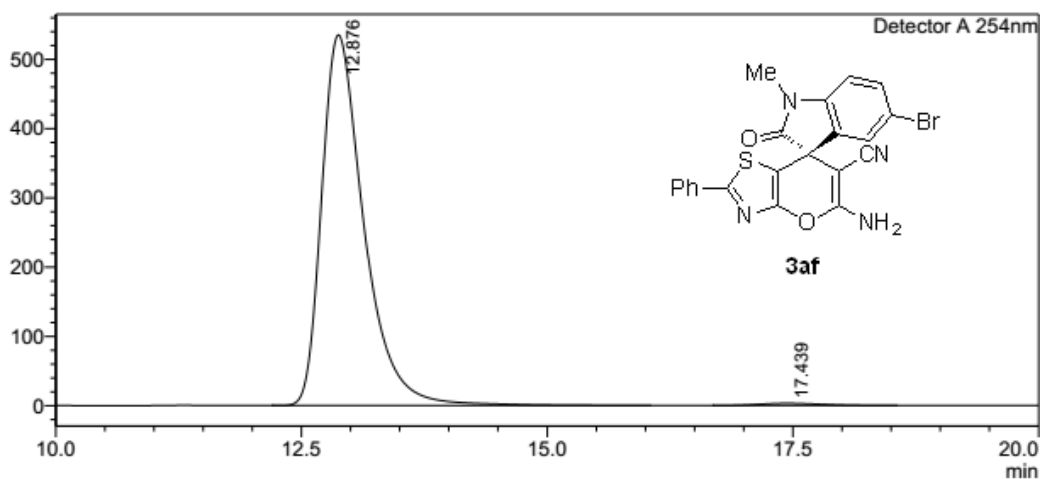

### <Peak Table>

Detector A 254nm

| Peak# | Ret. Time | Area     | Height | Conc.  | Unit | Mark | Name |
|-------|-----------|----------|--------|--------|------|------|------|
| 1     | 12.876    | 16011935 | 535053 | 99.188 |      |      |      |
| 2     | 17.439    | 131081   | 3044   | 0.812  |      |      |      |
| Total |           | 16143016 | 538097 |        |      |      |      |

### <Chromatogram>

mV

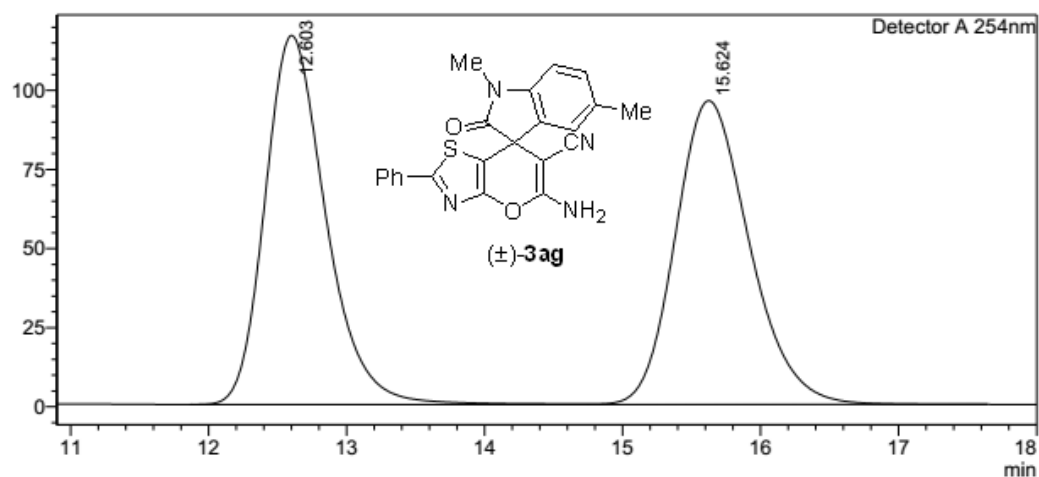

### <Peak Table>

Detector A 254nm

| Peak# | Ret. Time | Area    | Height | Conc.  | Unit | Mark | Name |
|-------|-----------|---------|--------|--------|------|------|------|
| 1     | 12.603    | 3583441 | 116653 | 49.968 |      |      |      |
| 2     | 15.624    | 3588090 | 96043  | 50.032 |      | V    |      |
| Total |           | 7171531 | 212696 |        |      |      |      |

### <Chromatogram>

mV

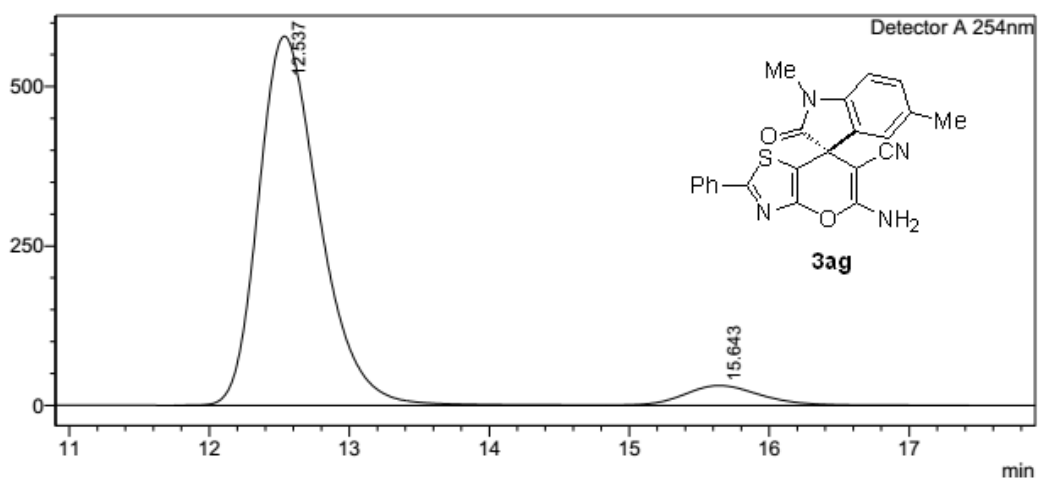

### <Peak Table>

Detector A 254nm

| Peak# | Ret. Time | Area     | Height | Conc.  | Unit | Mark | Name |
|-------|-----------|----------|--------|--------|------|------|------|
| 1     | 12.537    | 17503679 | 578745 | 93.717 |      |      |      |
| 2     | 15.643    | 1173551  | 30949  | 6.283  |      | V    |      |
| Total |           | 18677231 | 609694 |        |      |      |      |

### <Chromatogram>

mV

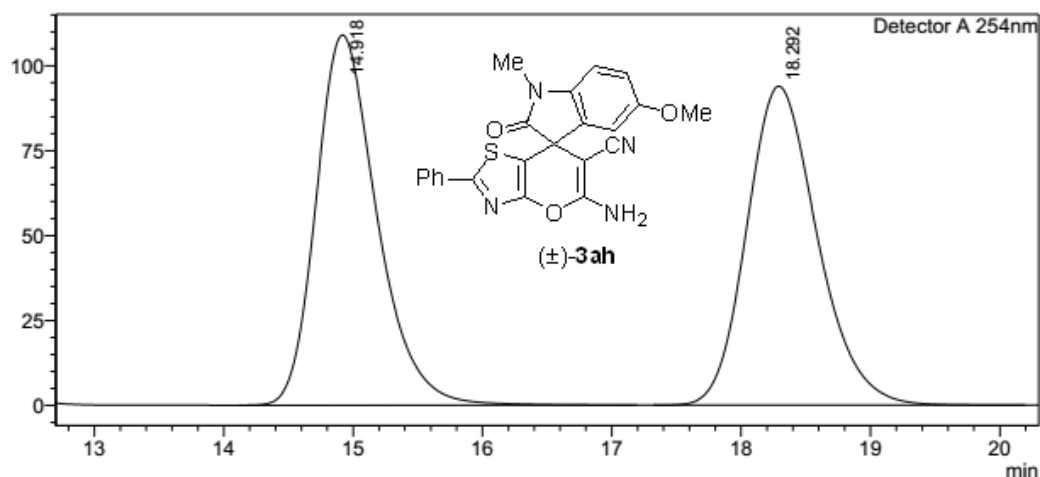

### <Peak Table>

Detector A 254nm

| Peak# | Ret. Time | Area    | Height | Conc.  | Unit | Mark | Name |
|-------|-----------|---------|--------|--------|------|------|------|
| 1     | 14.918    | 3568179 | 109003 | 49.998 |      |      |      |
| 2     | 18.292    | 3568476 | 93889  | 50.002 |      |      |      |
| Total |           | 7136655 | 202892 |        |      |      |      |

### <Chromatogram>

mV

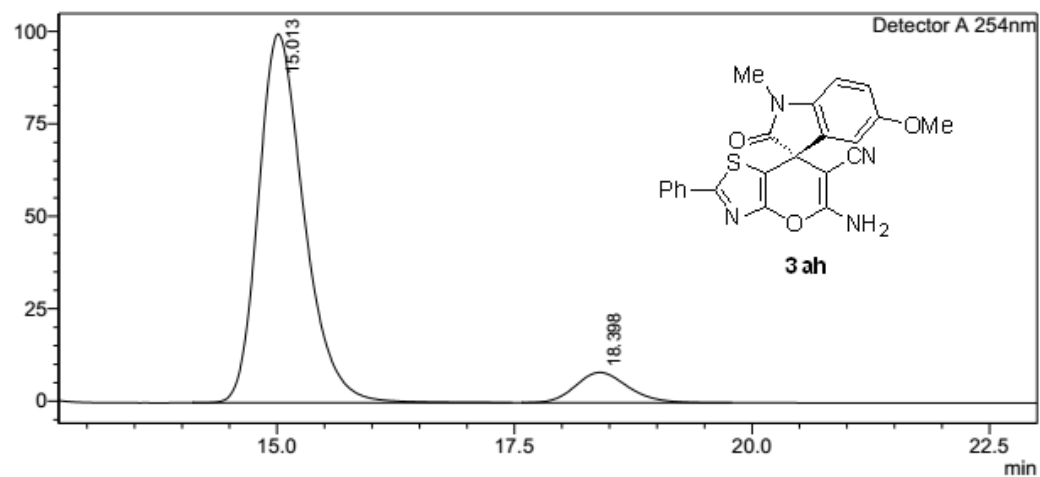

### <Peak Table>

Detector A 254nm

| Peak# | Ret. Time | Area    | Height | Conc.  | Unit | Mark | Name |
|-------|-----------|---------|--------|--------|------|------|------|
| 1     | 15.013    | 3329499 | 99678  | 91.365 |      |      |      |
| 2     | 18.398    | 314655  | 8172   | 8.635  |      |      |      |
| Total |           | 3644154 | 107850 |        |      |      |      |

### <Chromatogram>

mV

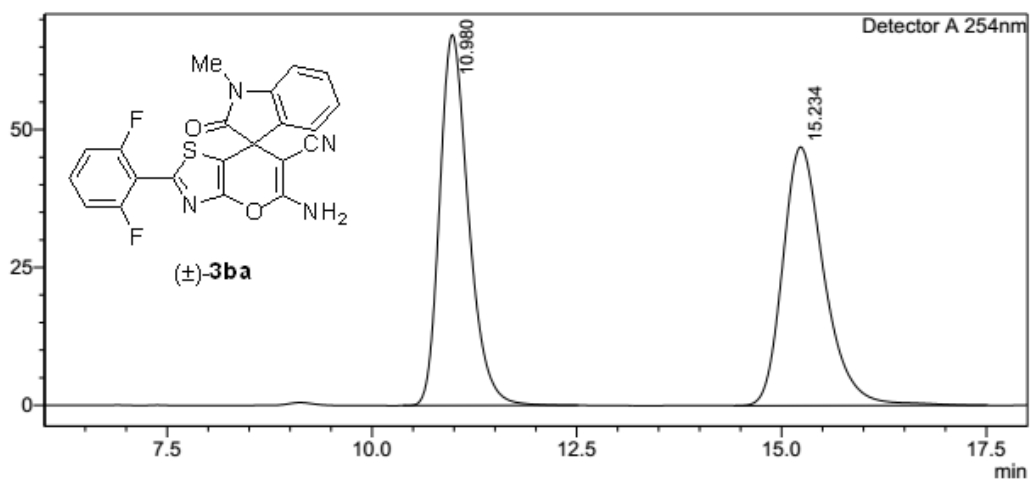

### <Peak Table>

Detector A 254nm

| Peak# | Ret. Time | Area    | Height | Conc.  | Unit | Mark | Name |
|-------|-----------|---------|--------|--------|------|------|------|
| 1     | 10.980    | 1654867 | 67278  | 50.016 |      |      |      |
| 2     | 15.234    | 1653817 | 46904  | 49.984 |      |      |      |
| Total |           | 3308684 | 114182 |        |      |      |      |

### <Chromatogram>

mV

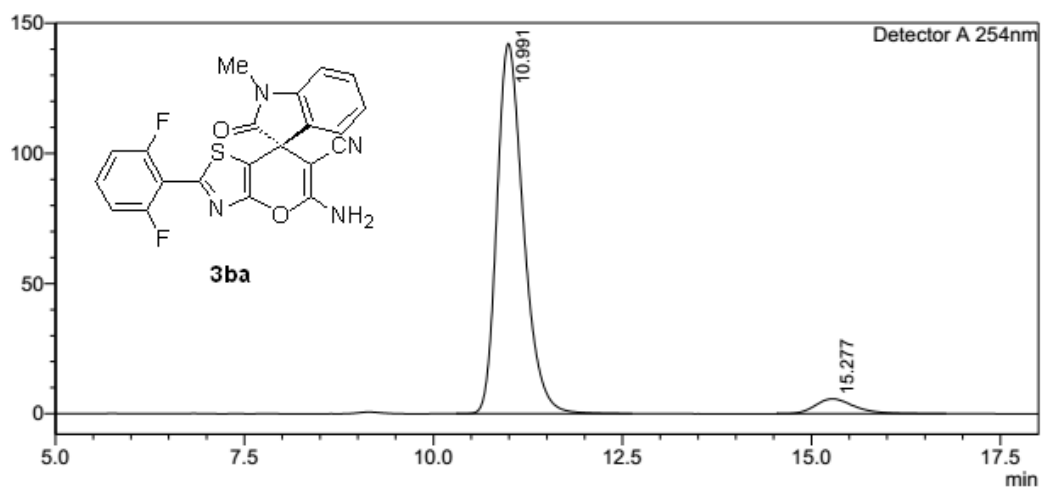

### <Peak Table>

Detector A 254nm

| Peak# | Ret. Time | Area    | Height | Conc.  | Unit | Mark | Name |
|-------|-----------|---------|--------|--------|------|------|------|
| 1     | 10.991    | 3464669 | 142165 | 94.396 |      |      |      |
| 2     | 15.277    | 205676  | 5712   | 5.604  |      |      |      |
| Total |           | 3670345 | 147878 |        |      |      |      |

### <Chromatogram>

mV

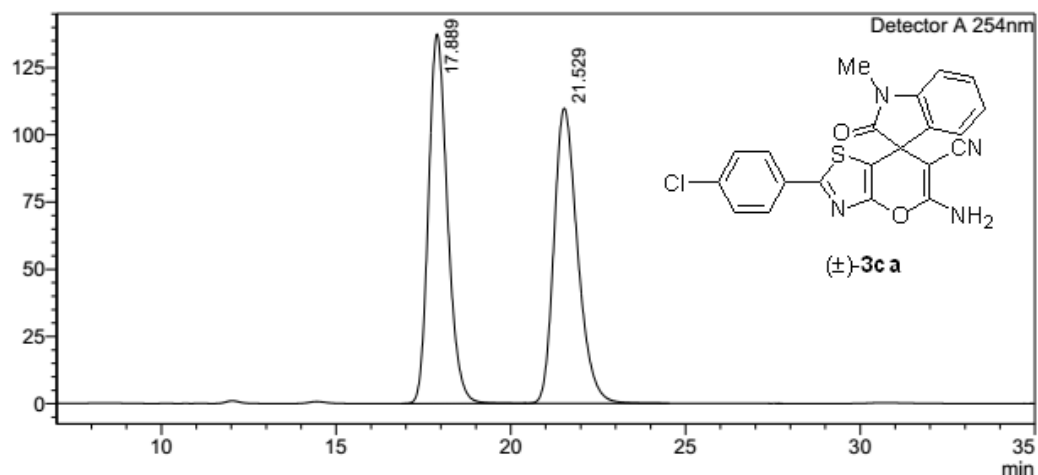

### <Peak Table>

Detector A 254nm

| Peak# | Ret. Time | Area     | Height | Conc.  | Unit | Mark | Name |
|-------|-----------|----------|--------|--------|------|------|------|
| 1     | 17.889    | 5186565  | 137329 | 50.099 |      |      |      |
| 2     | 21.529    | 5166164  | 109750 | 49.901 |      | V    |      |
| Total |           | 10352729 | 247079 |        |      |      |      |

### <Chromatogram>

mV

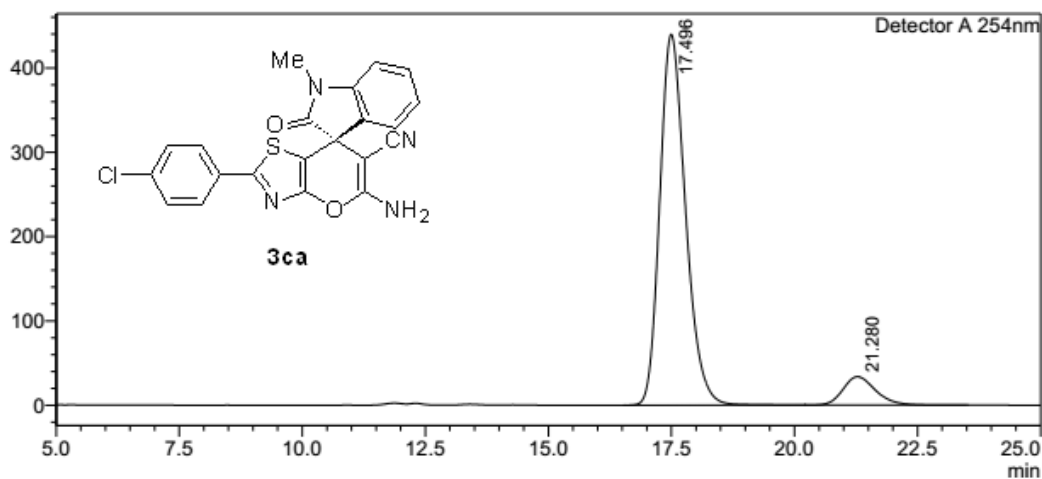

### <Peak Table>

Detector A 254nm

| Peak# | Ret. Time | Area     | Height | Conc.  | Unit | Mark | Name |
|-------|-----------|----------|--------|--------|------|------|------|
| 1     | 17.496    | 16011348 | 439641 | 91.151 |      |      |      |
| 2     | 21.280    | 1554313  | 33653  | 8.849  |      | V    |      |
| Total |           | 17565662 | 473294 |        |      |      |      |

### <Chromatogram>

mV

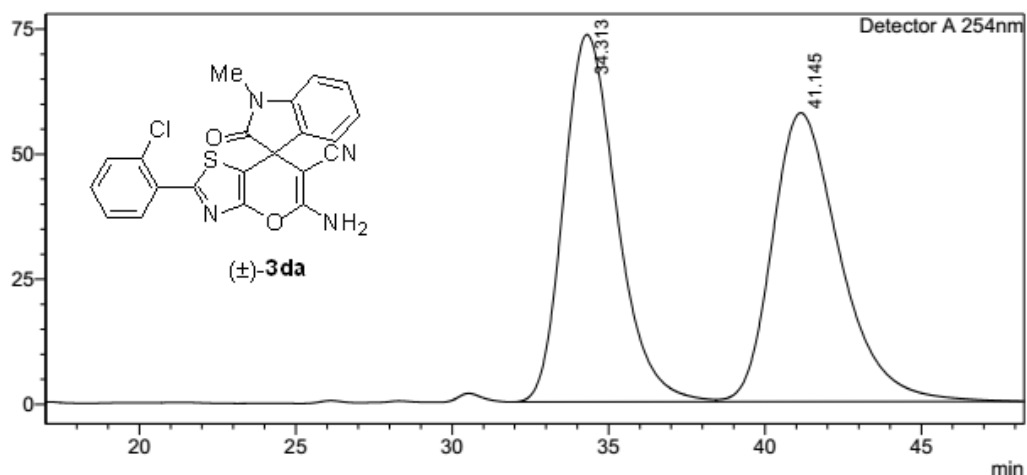

### <Peak Table>

Detector A 254nm

| Peak# | Ret. Time | Area     | Height | Conc.  | Unit | Mark | Name |
|-------|-----------|----------|--------|--------|------|------|------|
| 1     | 34.313    | 8678255  | 73437  | 49.969 |      |      |      |
| 2     | 41.145    | 8688920  | 57731  | 50.031 |      | V    |      |
| Total |           | 17367175 | 131168 |        |      |      |      |

### <Chromatogram>

mV

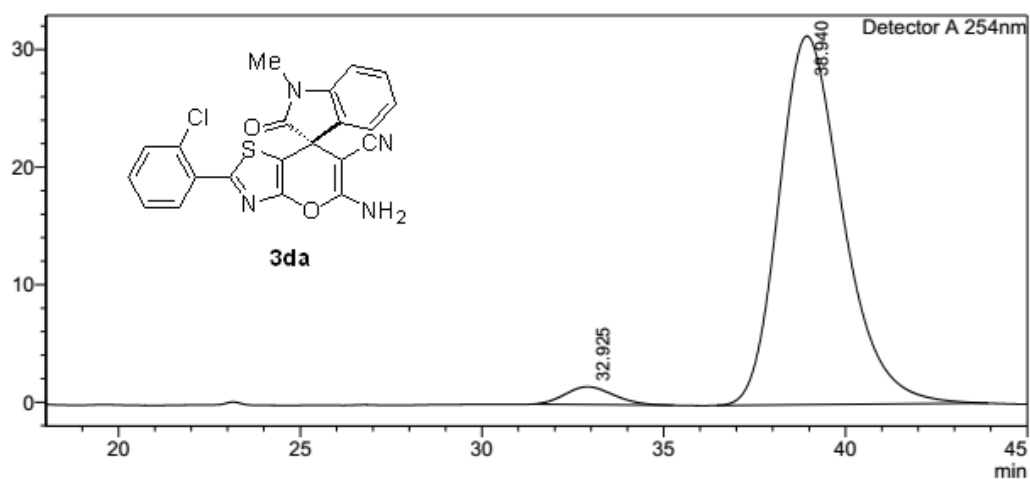

### <Peak Table>

Detector A 254nm

| Peak# | Ret. Time | Area    | Height | Conc.  | Unit | Mark | Name |
|-------|-----------|---------|--------|--------|------|------|------|
| 1     | 32.925    | 142042  | 1519   | 3.566  |      |      |      |
| 2     | 38.940    | 3841261 | 31368  | 96.434 |      |      |      |
| Total |           | 3983303 | 32888  |        |      |      |      |

### <Chromatogram>

mV

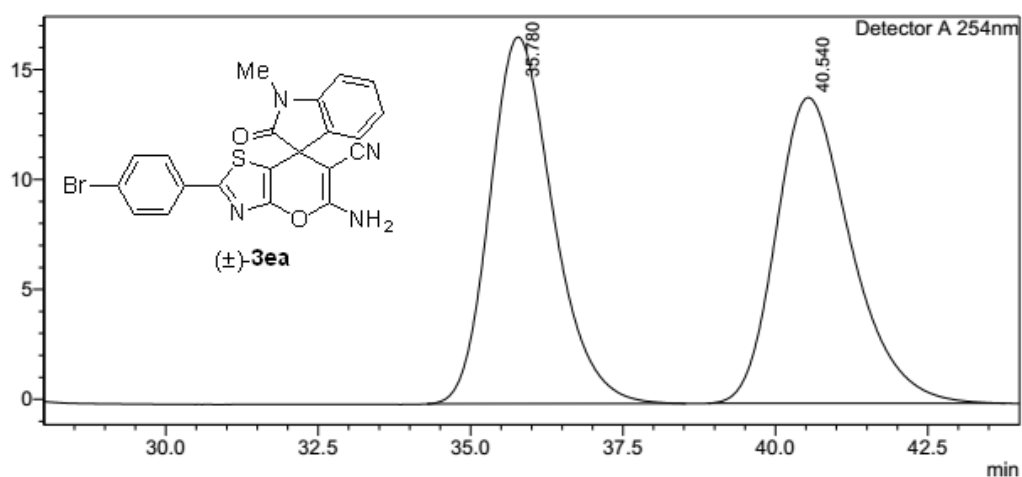

### <Peak Table>

Detector A 254nm

| Peak# | Ret. Time | Area    | Height | Conc.  | Unit | Mark | Name |
|-------|-----------|---------|--------|--------|------|------|------|
| 1     | 35.780    | 1206943 | 16681  | 50.268 |      |      |      |
| 2     | 40.540    | 1194083 | 13907  | 49.732 |      |      |      |
| Total |           | 2401026 | 30588  |        |      |      |      |

### <Chromatogram>

mV

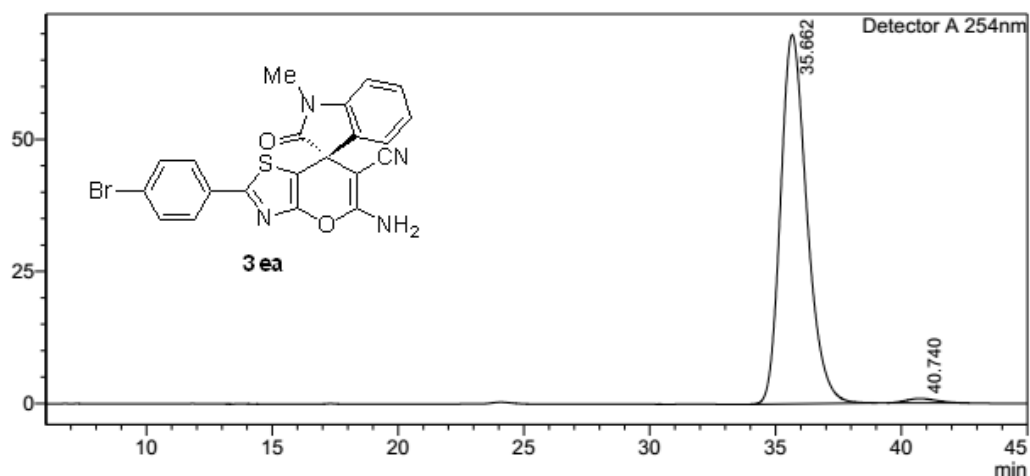

### <Peak Table>

Detector A 254nm

| Peak# | Ret. Time | Area    | Height | Conc.  | Unit | Mark | Name |
|-------|-----------|---------|--------|--------|------|------|------|
| 1     | 35.662    | 5075772 | 69872  | 98.626 |      |      |      |
| 2     | 40.740    | 70738   | 845    | 1.374  |      |      |      |
| Total |           | 5146510 | 70717  |        |      |      |      |

### <Chromatogram>

mV

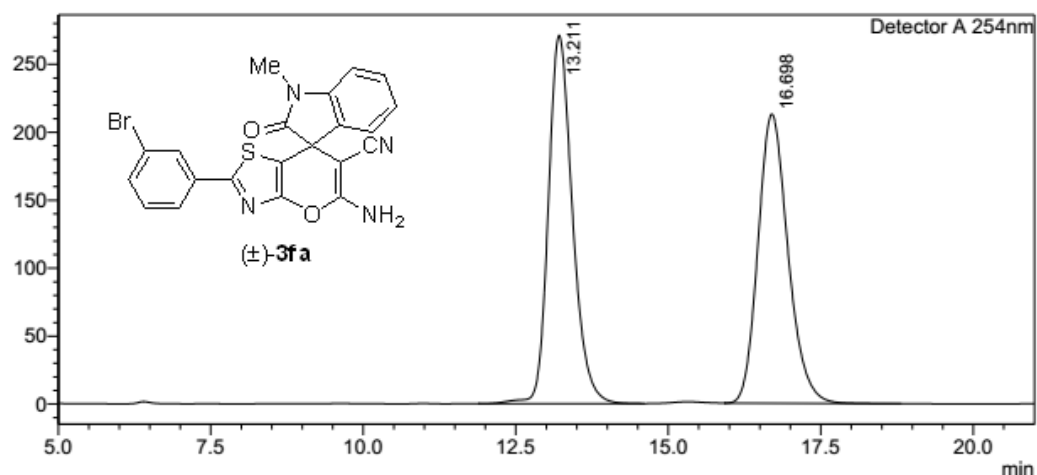

### <Peak Table>

Detector A 254nm

| Peak# | Ret. Time | Area     | Height | Conc.  | Unit | Mark | Name |
|-------|-----------|----------|--------|--------|------|------|------|
| 1     | 13.211    | 7475249  | 270996 | 50.645 |      |      |      |
| 2     | 16.698    | 7284702  | 212738 | 49.355 |      |      |      |
| Total |           | 14759951 | 483734 |        |      |      |      |

### <Chromatogram>

mV

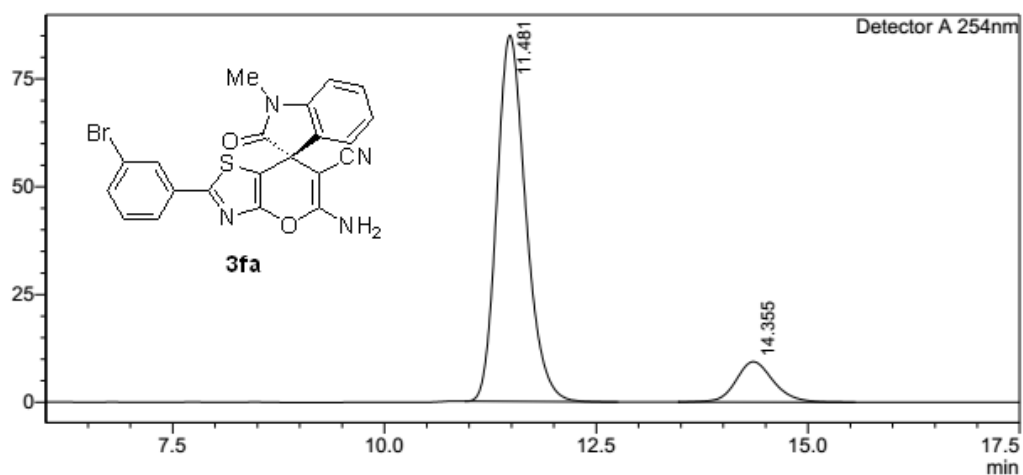

### <Peak Table>

Detector A 254nm

| Peak# | Ret. Time | Area    | Height | Conc.  | Unit | Mark | Name |
|-------|-----------|---------|--------|--------|------|------|------|
| 1     | 11.481    | 2022887 | 84906  | 87.533 |      |      |      |
| 2     | 14.355    | 288109  | 9354   | 12.467 |      |      |      |
| Total |           | 2310996 | 94261  |        |      |      |      |



### <Chromatogram>

mV

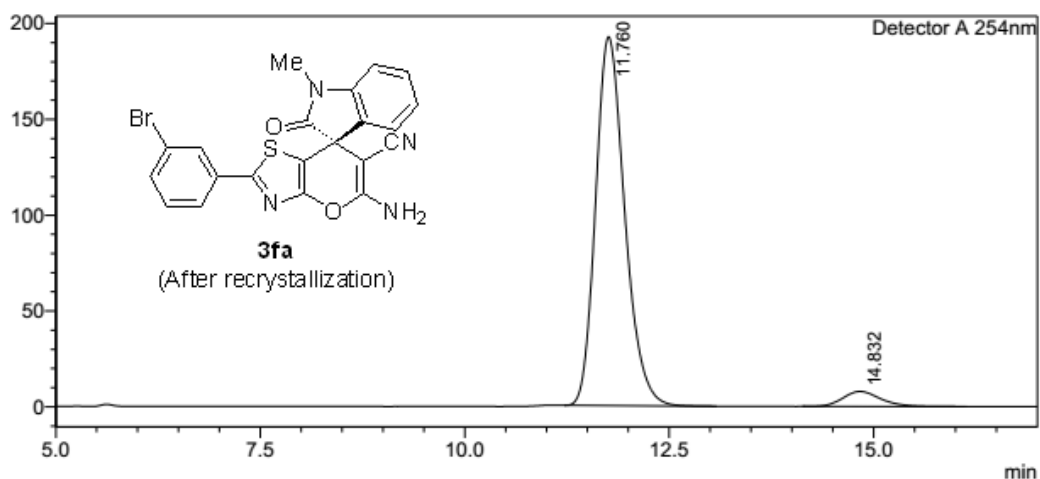

### <Peak Table>

Detector A 254nm

| Peak# | Ret. Time | Area    | Height | Conc.  | Unit | Mark | Name |
|-------|-----------|---------|--------|--------|------|------|------|
| 1     | 11.760    | 4773268 | 192412 | 95.000 |      |      |      |
| 2     | 14.832    | 251232  | 7810   | 5.000  |      |      |      |
| Total |           | 5024500 | 200222 |        |      |      |      |

### <Chromatogram>

mV

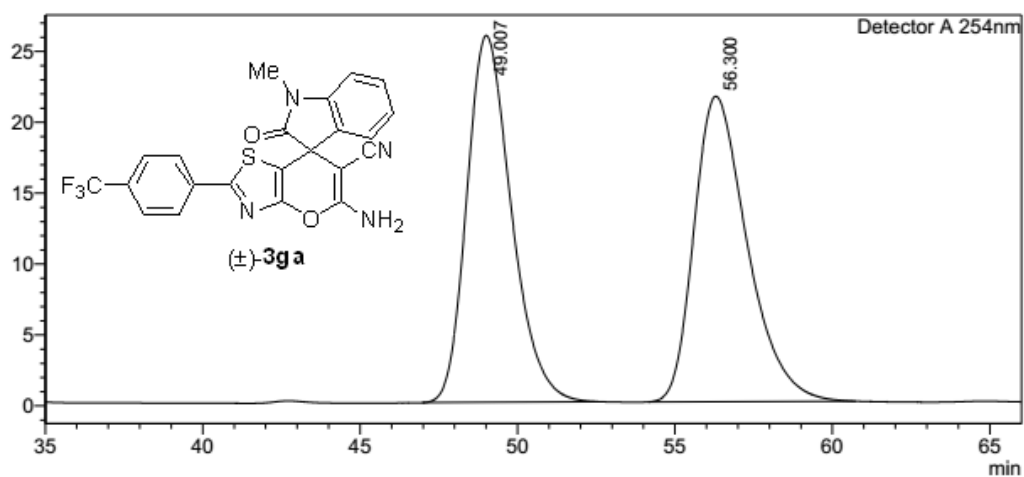

### <Peak Table>

Detector A 254nm

| Peak# | Ret. Time | Area    | Height | Conc.  | Unit | Mark | Name |
|-------|-----------|---------|--------|--------|------|------|------|
| 1     | 49.007    | 2551289 | 25874  | 50.195 |      |      |      |
| 2     | 56.300    | 2531480 | 21537  | 49.805 |      |      |      |
| Total |           | 5082770 | 47412  |        |      |      |      |

### <Chromatogram>

mV

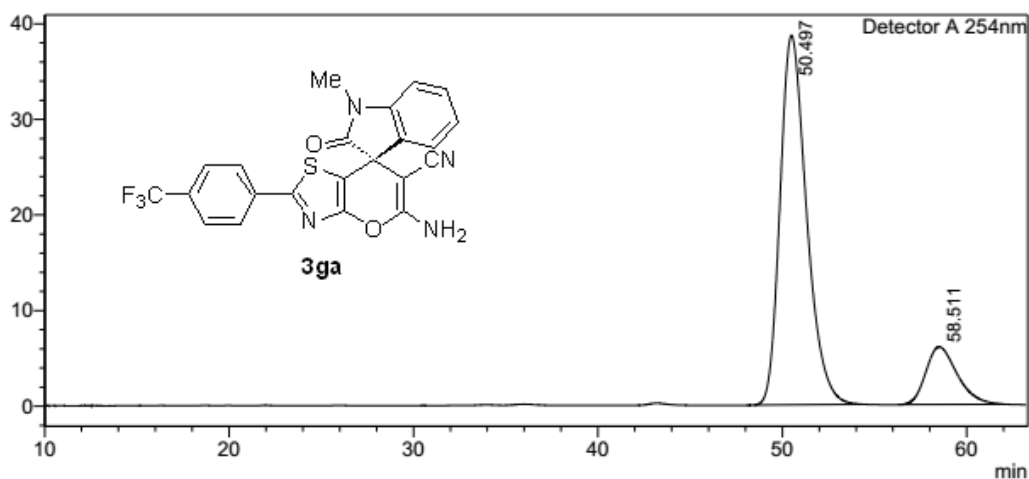

### <Peak Table>

Detector A 254nm

| Peak# | Ret. Time | Area    | Height | Conc.  | Unit | Mark | Name |
|-------|-----------|---------|--------|--------|------|------|------|
| 1     | 50.497    | 3862639 | 38608  | 84.349 |      |      |      |
| 2     | 58.511    | 716738  | 6028   | 15.651 |      |      |      |
| Total |           | 4579376 | 44636  |        |      |      |      |

### <Chromatogram>

mV

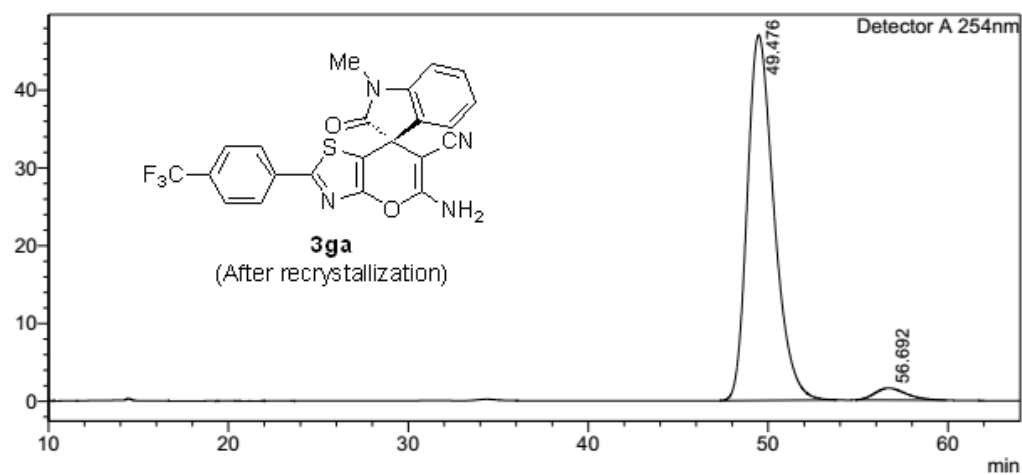

### <Peak Table>

Detector A 254nm

| Peak# | Ret. Time | Area    | Height | Conc.  | Unit | Mark | Name |
|-------|-----------|---------|--------|--------|------|------|------|
| 1     | 49.476    | 4848934 | 47010  | 96.338 |      |      |      |
| 2     | 56.692    | 184312  | 1533   | 3.662  |      |      |      |
| Total |           | 5033246 | 48543  |        |      |      |      |

### <Chromatogram>

mV

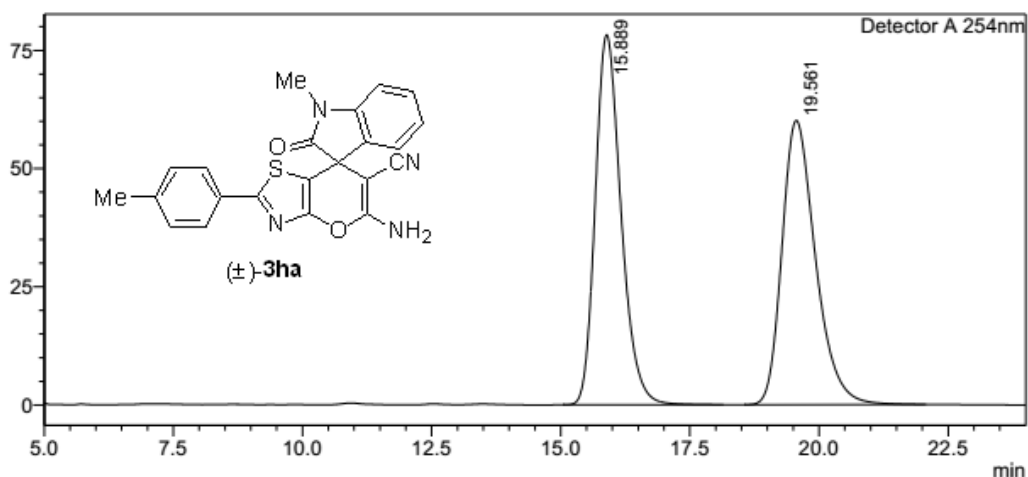

### <Peak Table>

Detector A 254nm

| Peak# | Ret. Time | Area    | Height | Conc.  | Unit | Mark | Name |
|-------|-----------|---------|--------|--------|------|------|------|
| 1     | 15.889    | 2721576 | 78240  | 50.056 |      |      |      |
| 2     | 19.561    | 2715518 | 60112  | 49.944 |      |      |      |
| Total |           | 5437094 | 138351 |        |      |      |      |

### <Chromatogram>

mV

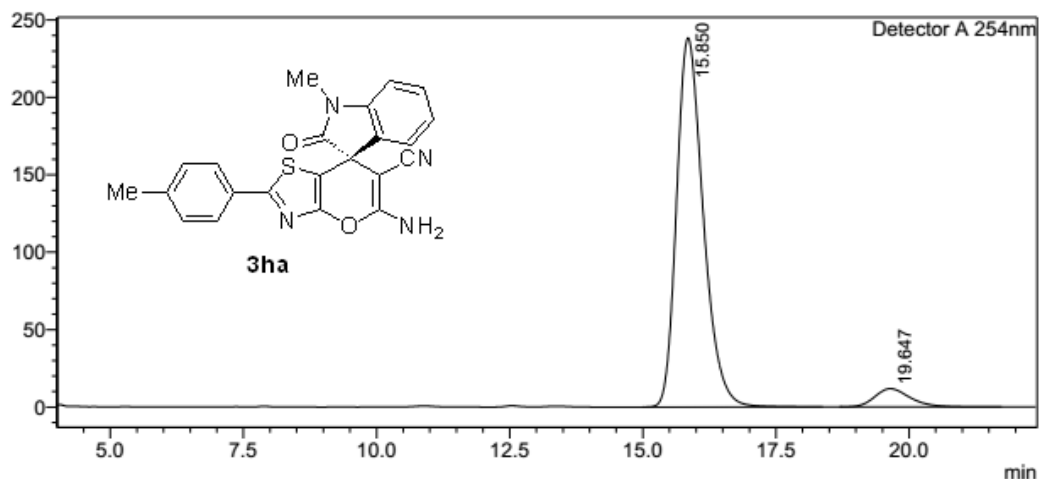

### <Peak Table>

Detector A 254nm

| Peak# | Ret. Time | Area    | Height | Conc.  | Unit | Mark | Name |
|-------|-----------|---------|--------|--------|------|------|------|
| 1     | 15.850    | 8307913 | 238440 | 93.852 |      | S    |      |
| 2     | 19.647    | 544193  | 11768  | 6.148  |      |      |      |
| Total |           | 8852106 | 250207 |        |      |      |      |

### <Chromatogram>

mV

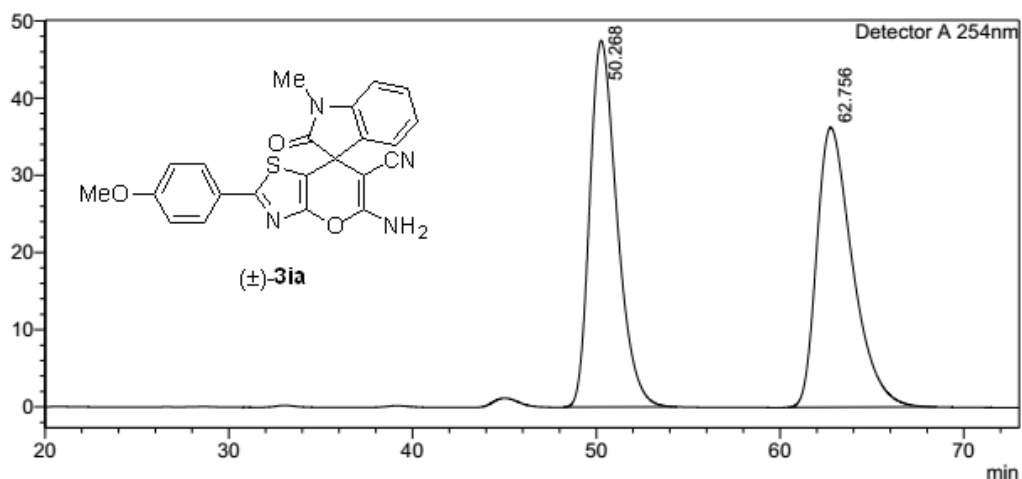

### <Peak Table>

Detector A 254nm

| Peak# | Ret. Time | Area    | Height | Conc.  | Unit | Mark | Name |
|-------|-----------|---------|--------|--------|------|------|------|
| 1     | 50.268    | 4899235 | 47465  | 50.066 |      |      |      |
| 2     | 62.756    | 4886325 | 36237  | 49.934 |      |      |      |
| Total |           | 9785561 | 83702  |        |      |      |      |

### <Chromatogram>

mV

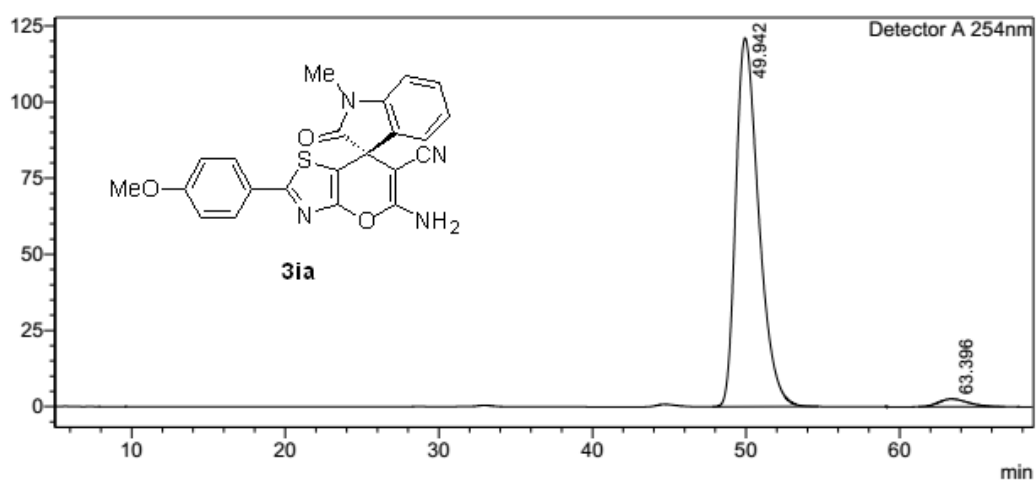

### <Peak Table>

Detector A 254nm

| Peak# | Ret. Time | Area     | Height | Conc.  | Unit | Mark | Name |
|-------|-----------|----------|--------|--------|------|------|------|
| 1     | 49.942    | 12581928 | 121031 | 97.381 |      |      |      |
| 2     | 63.396    | 338346   | 2549   | 2.619  |      |      |      |
| Total |           | 12920275 | 123580 |        |      |      |      |

### <Chromatogram>

mV

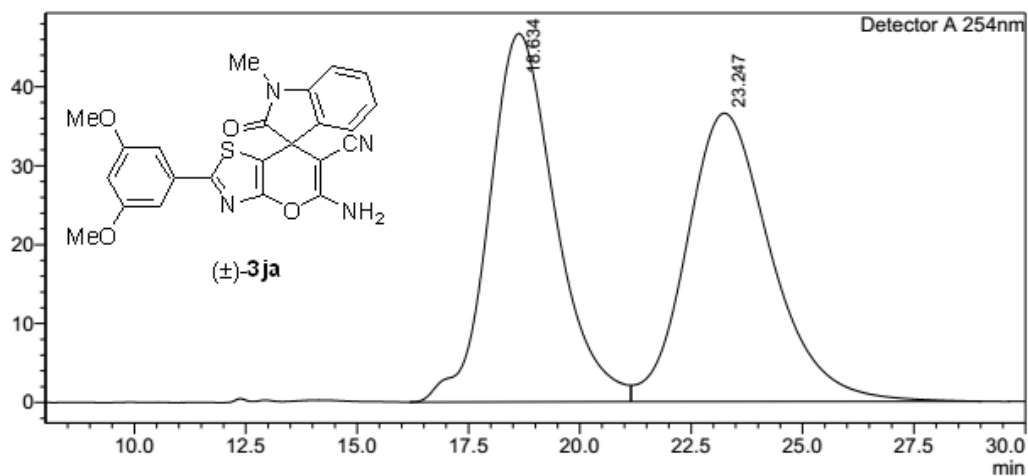

### <Peak Table>

Detector A 254nm

| Peak# | Ret. Time | Area    | Height | Conc.  | Unit | Mark | Name |
|-------|-----------|---------|--------|--------|------|------|------|
| 1     | 18.634    | 4817166 | 46672  | 49.998 |      |      |      |
| 2     | 23.247    | 4817595 | 36547  | 50.002 |      | V    |      |
| Total |           | 9634761 | 83219  |        |      |      |      |

### <Chromatogram>

mV

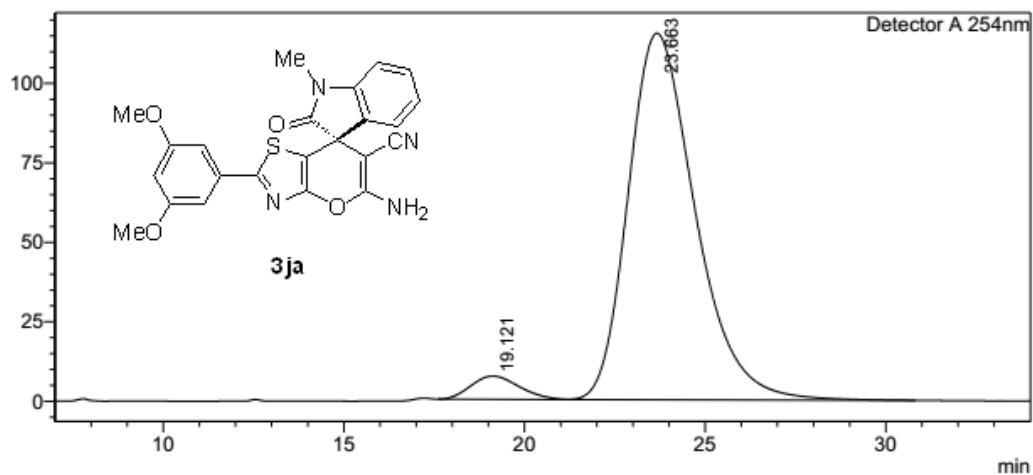

### <Peak Table>

Detector A 254nm

| Peak# | Ret. Time | Area     | Height | Conc.  | Unit | Mark | Name |
|-------|-----------|----------|--------|--------|------|------|------|
| 1     | 19.121    | 679778   | 7318   | 4.370  |      |      |      |
| 2     | 23.663    | 14877105 | 115323 | 95.630 |      | V    |      |
| Total |           | 15556883 | 122641 |        |      |      |      |

## 5. Copies of HPLC Spectra

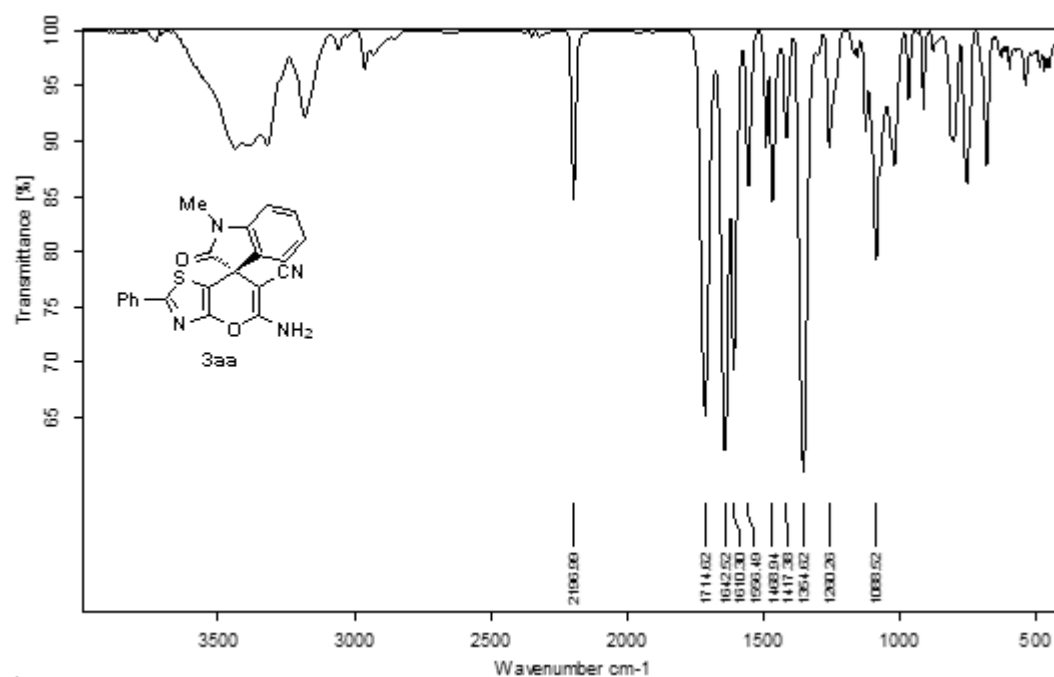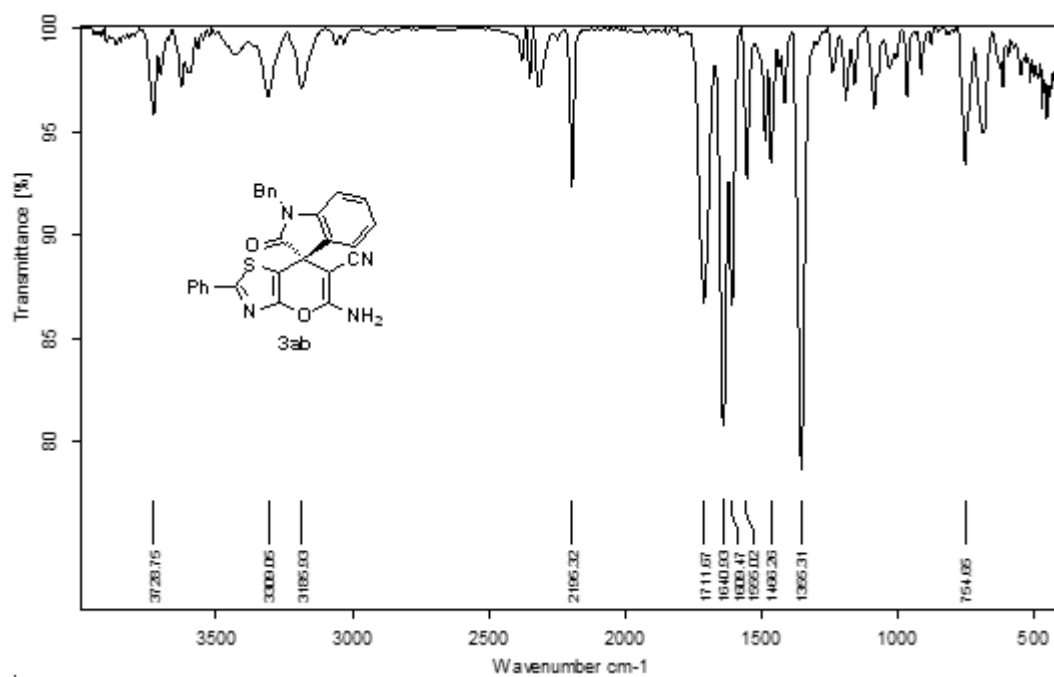

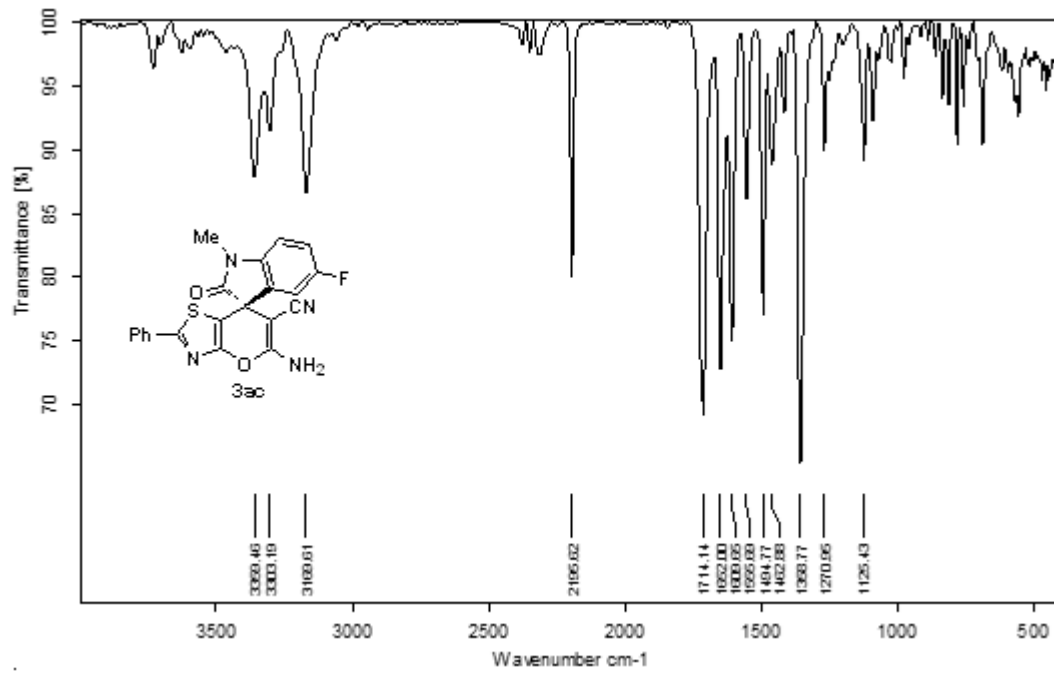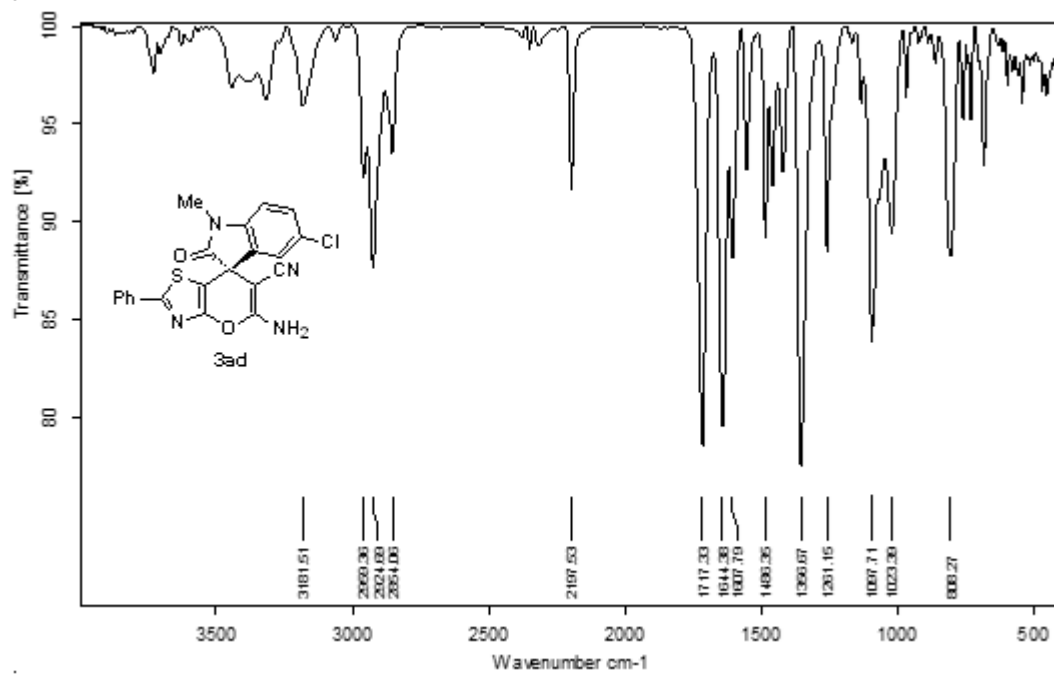

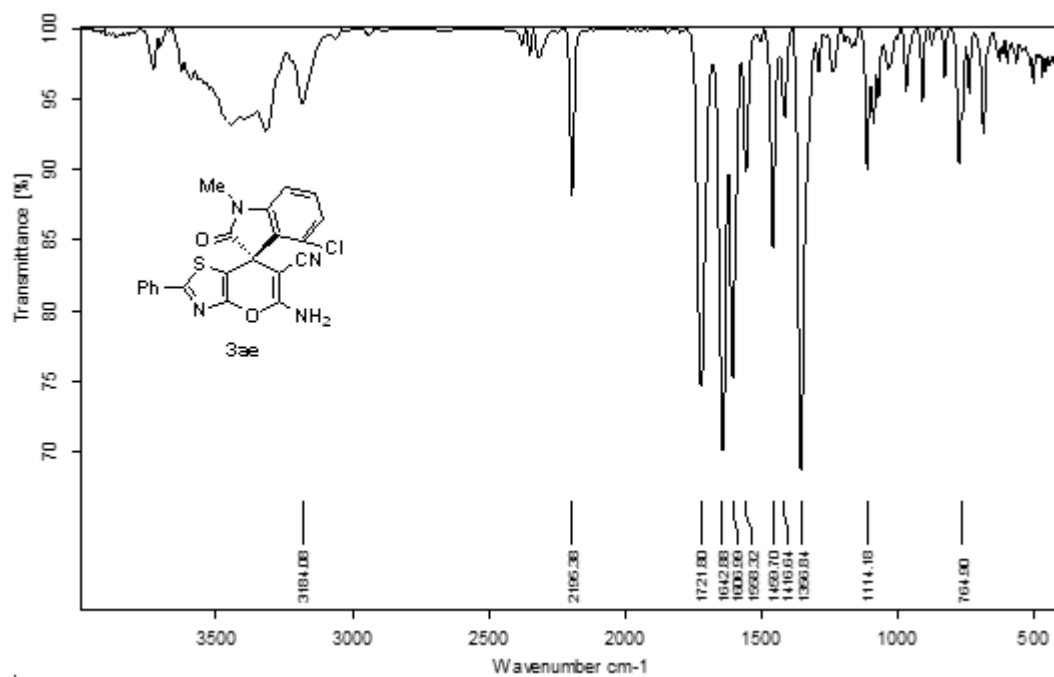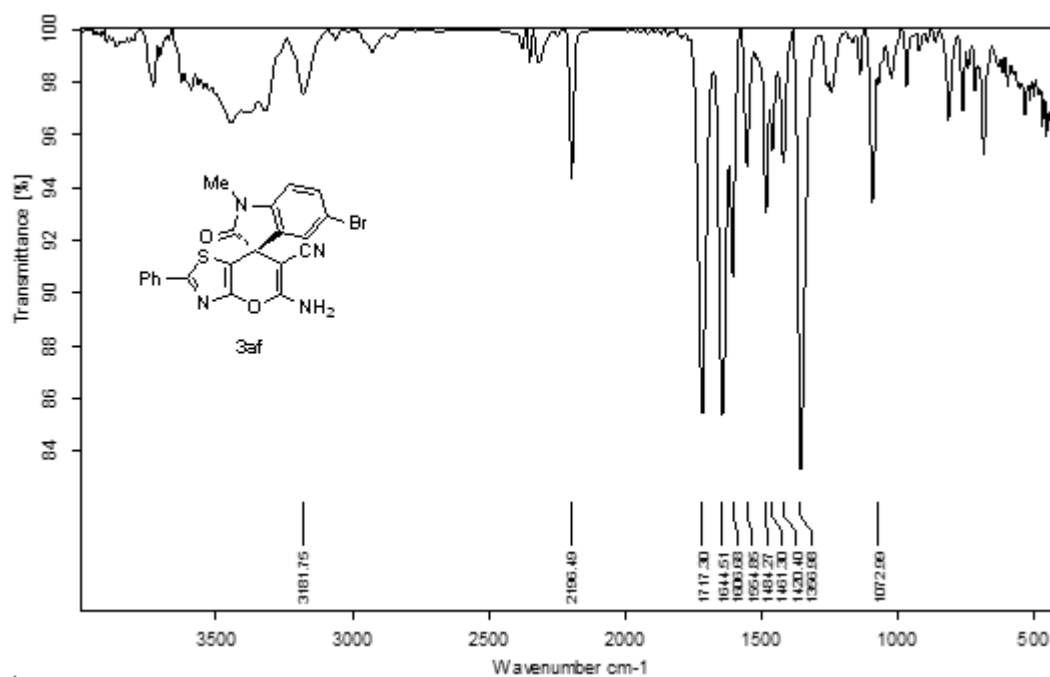



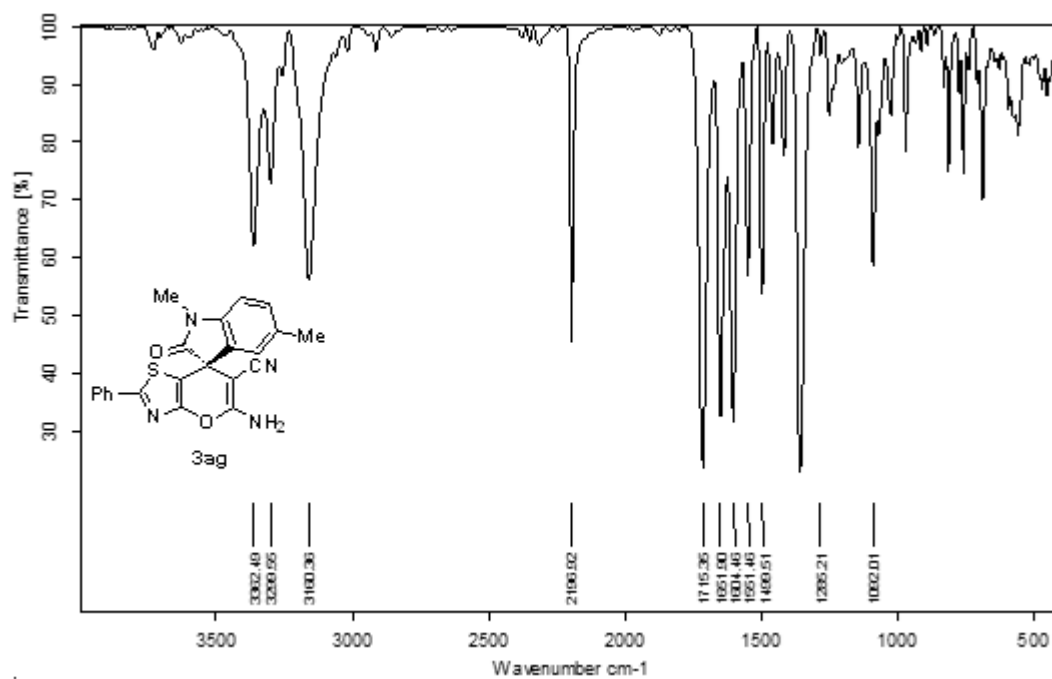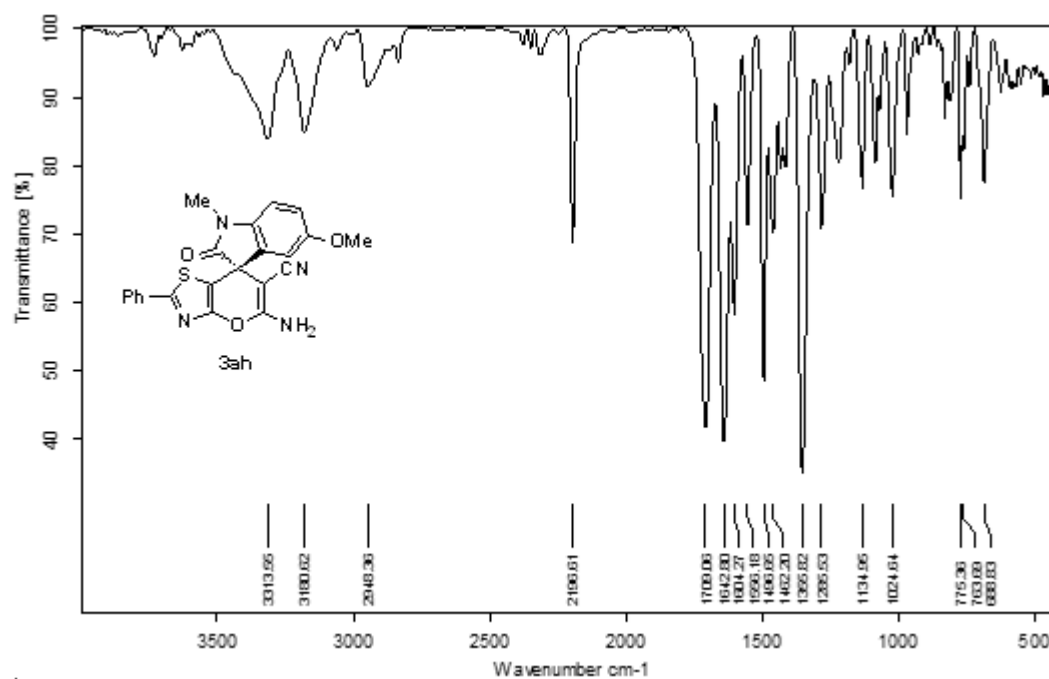

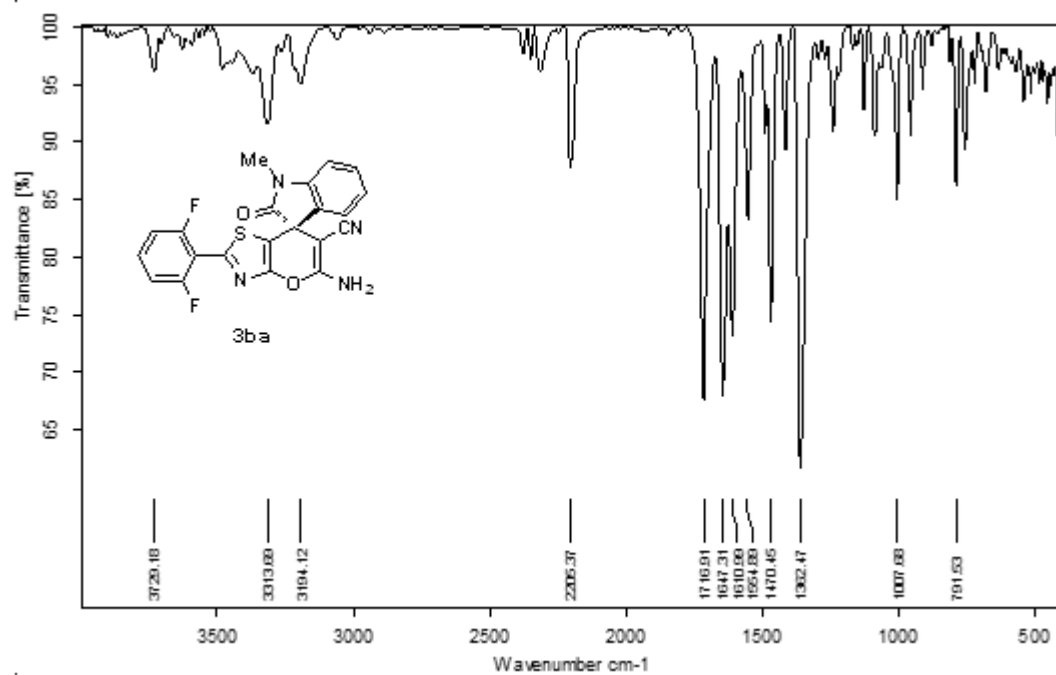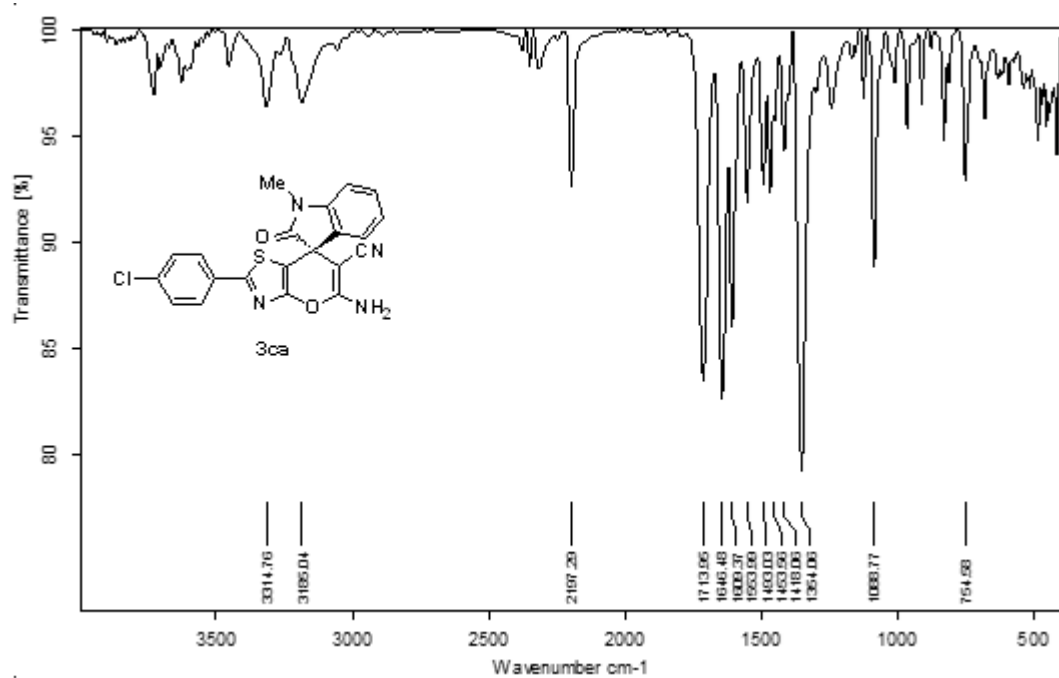

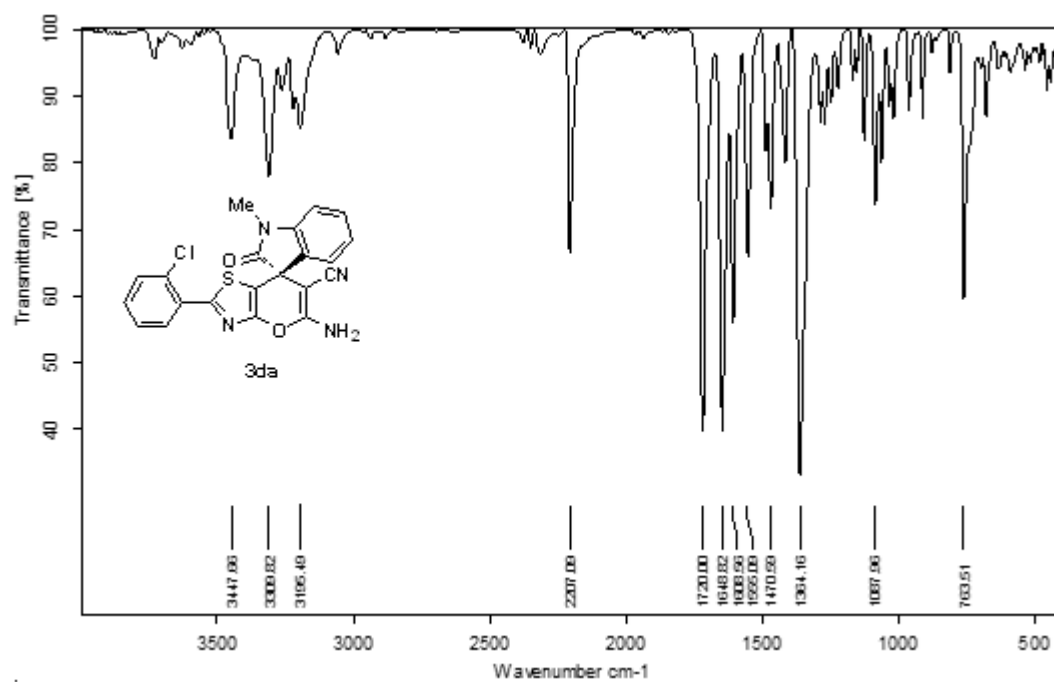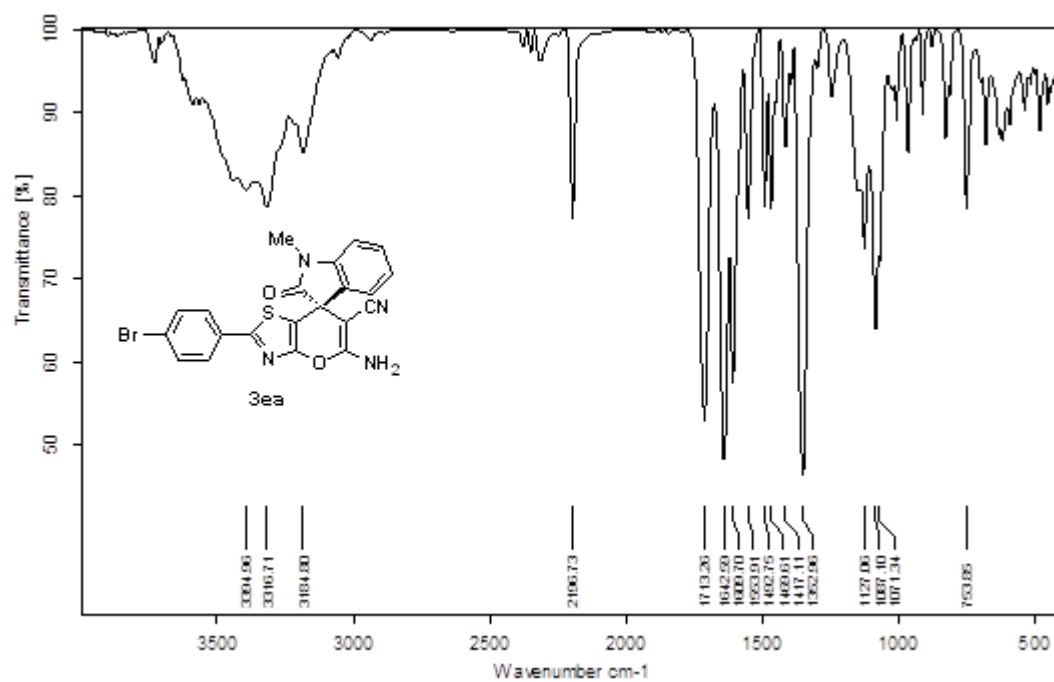

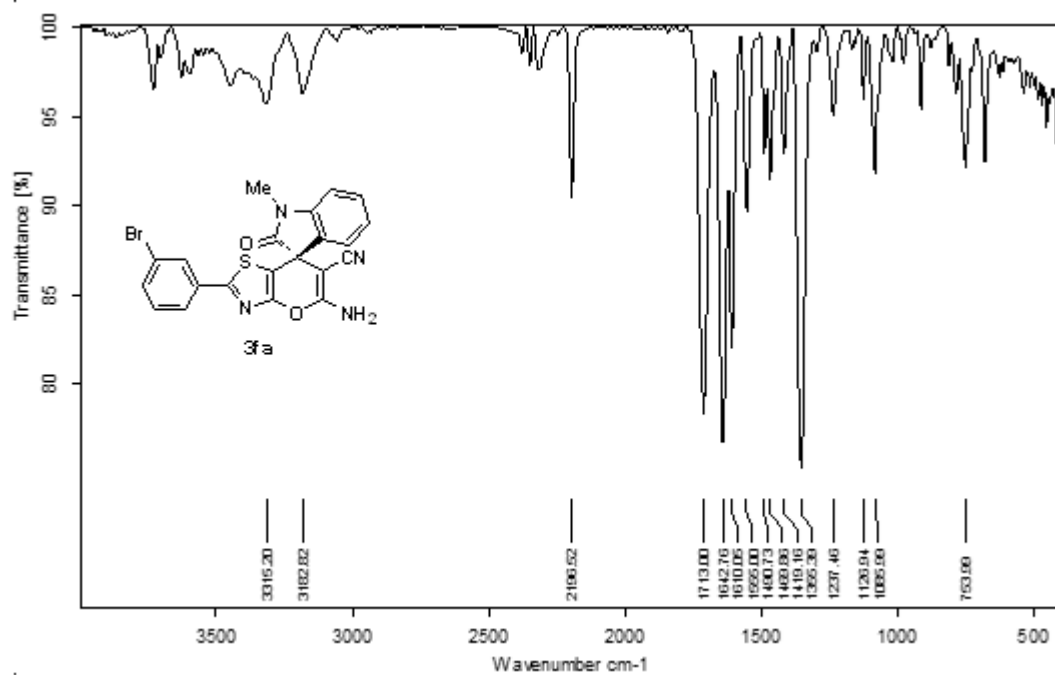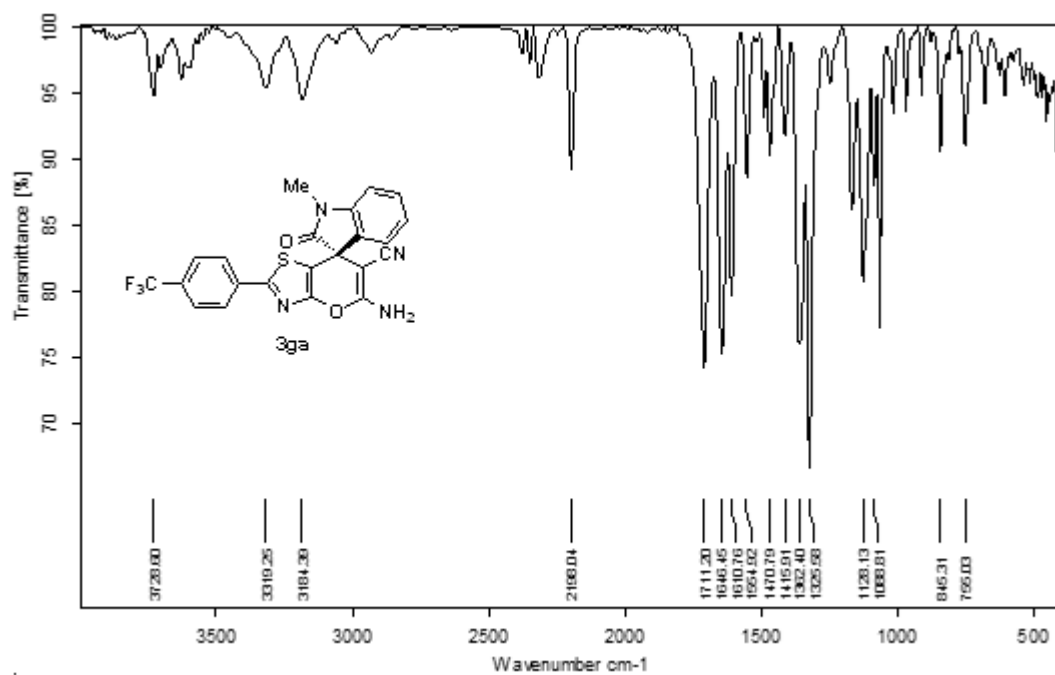

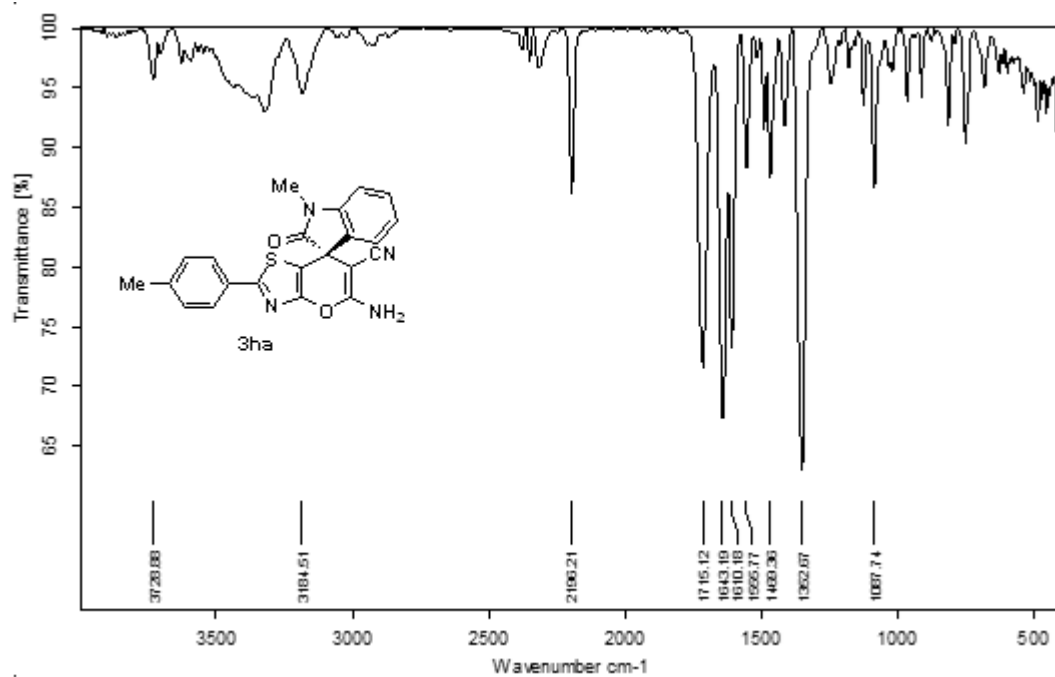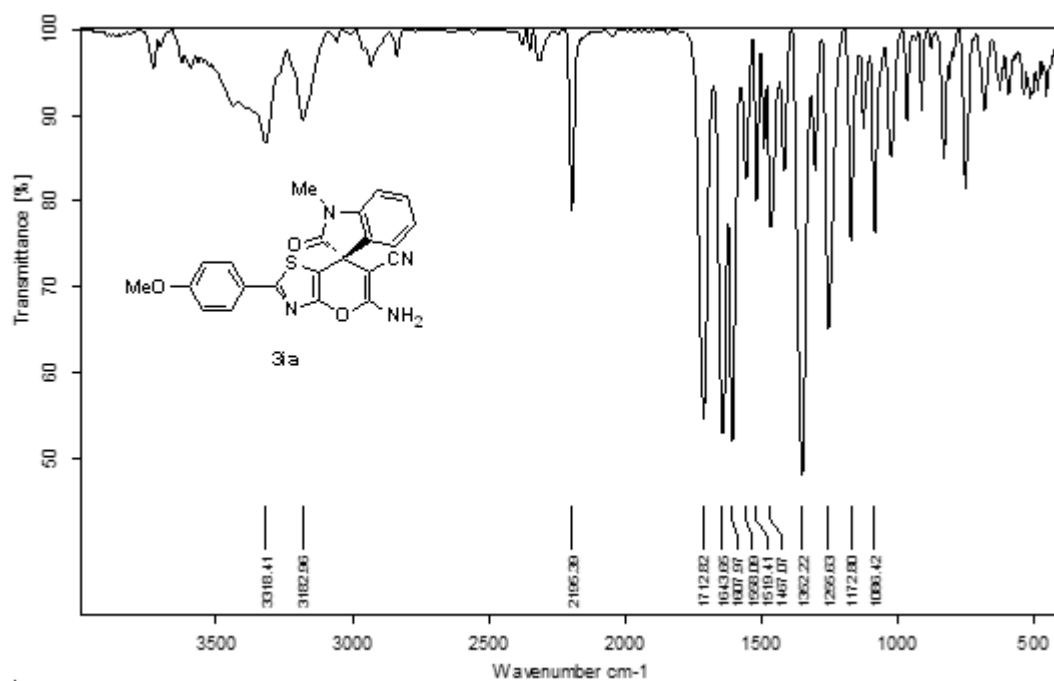

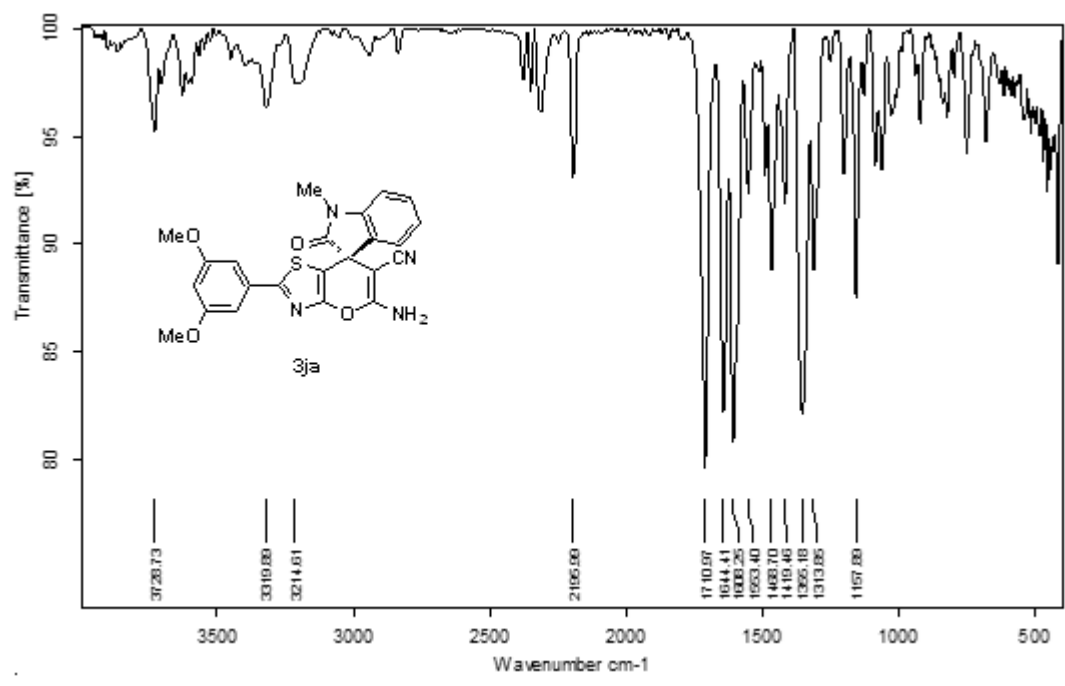

Supplement: c6ra14178a1.pdf [file c6ra14178a1.pdf]
